# Supplementary material
Source: publisher figshare collection journal article supplement (https://acs.figshare.com/ndownloader/files/6217299)

## Supporting Information

### Synthesis of Quinazolines from *N,N'*-Disubstituted Amidines via I<sub>2</sub>/KI-Mediated Oxidative C–C Bond Formation

Zhigang Lv, Bingnan Wang, Zhiyuan Hu, Yiming Zhou, Wenquan Yu,\* and Junbiao Chang\*

*College of Chemistry and Molecular Engineering, Zhengzhou University, Zhengzhou, Henan  
Province 450001, China*

#### CONTENTS:

|                                                                              |     |
|------------------------------------------------------------------------------|-----|
| 1. Schemes for the Preparation of Substrates <b>1</b>                        | S2  |
| 2. <sup>1</sup> H NMR and <sup>13</sup> C NMR Spectra of Substrates <b>1</b> | S3  |
| 3. <sup>1</sup> H NMR and <sup>13</sup> C NMR Spectra of Products <b>2</b>   | S26 |

## 1. Schemes for the Preparation of Substrates 1

### Scheme S1. Preparation of Substrates 1a-j

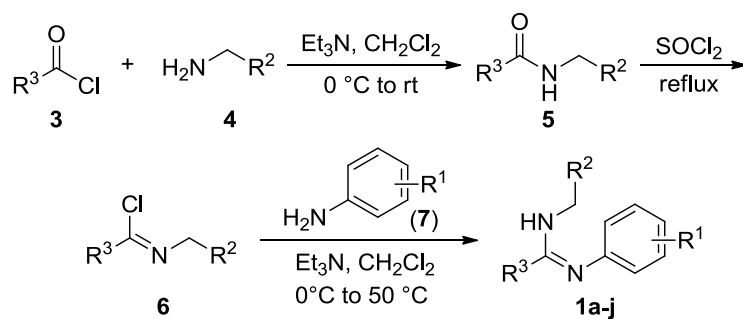

### Scheme S2. Preparation of Substrates 1k-w

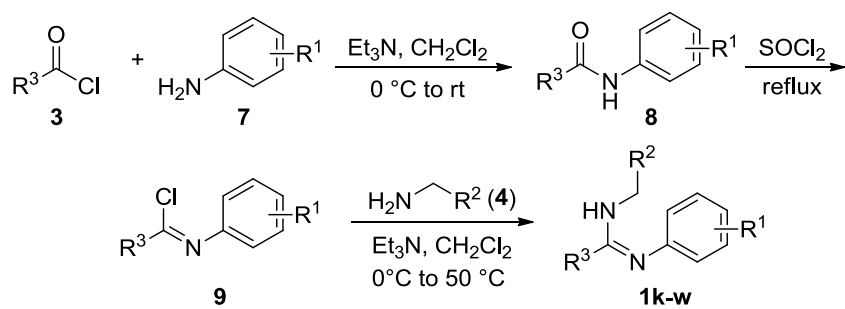

## 2. $^1\text{H}$ NMR and $^{13}\text{C}$ NMR Spectra of Substrates 1

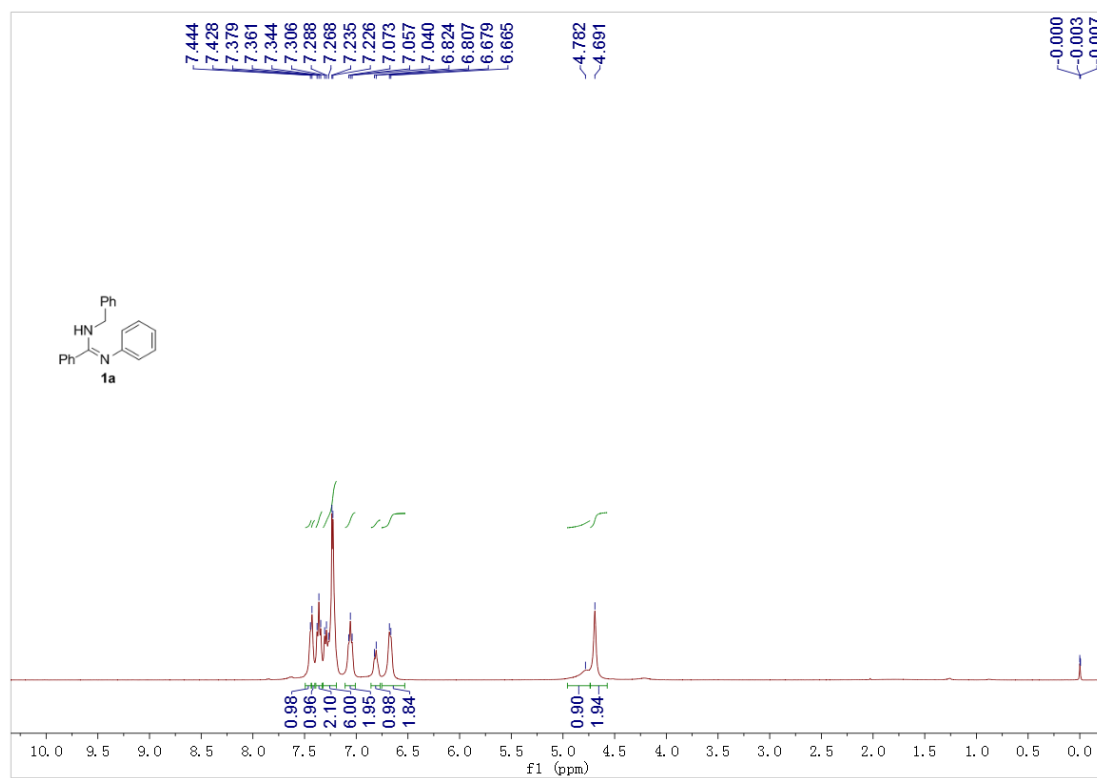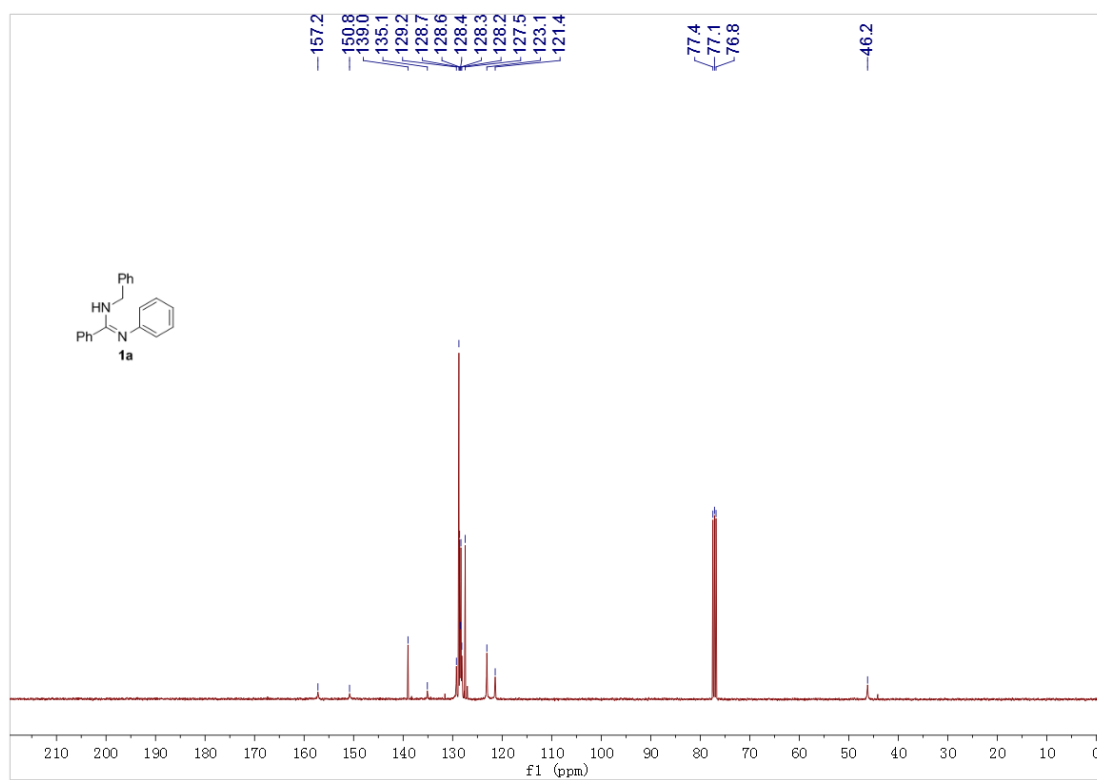

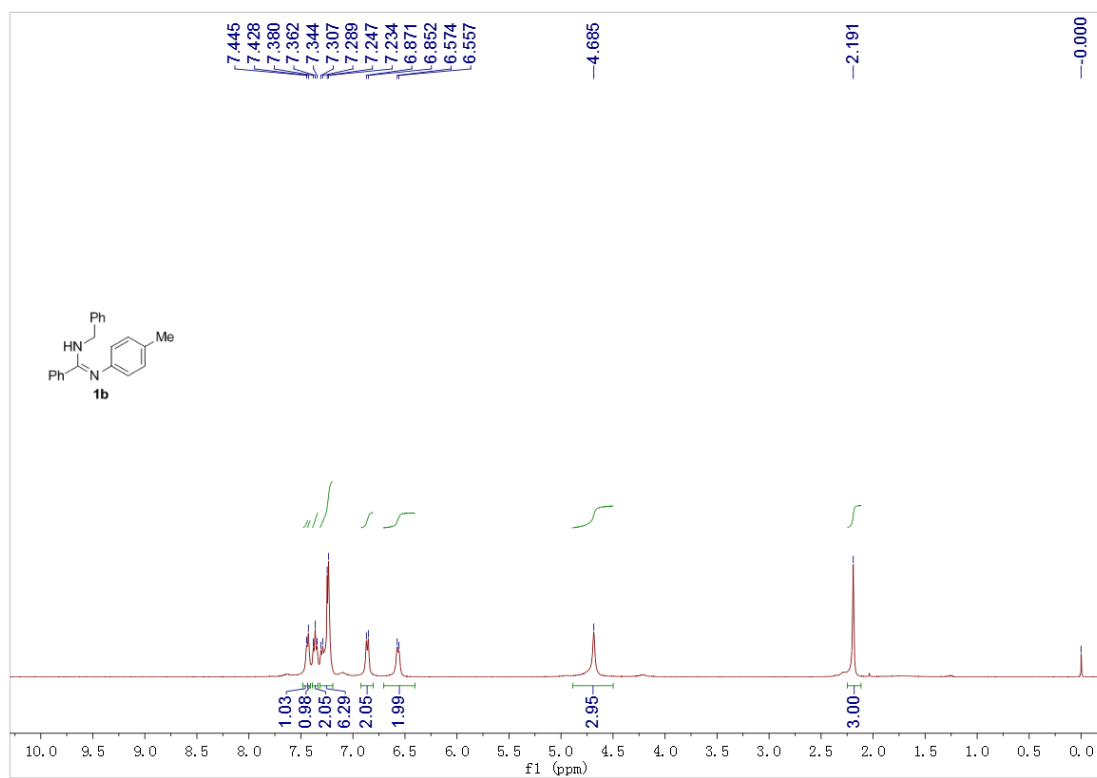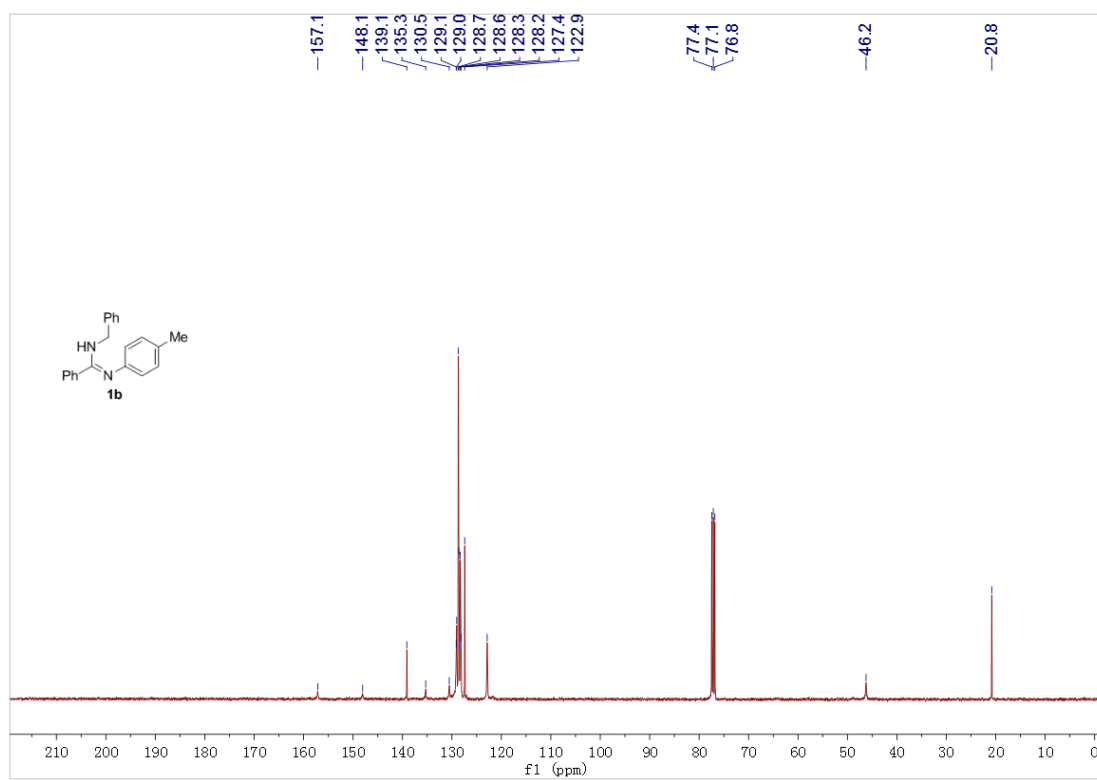

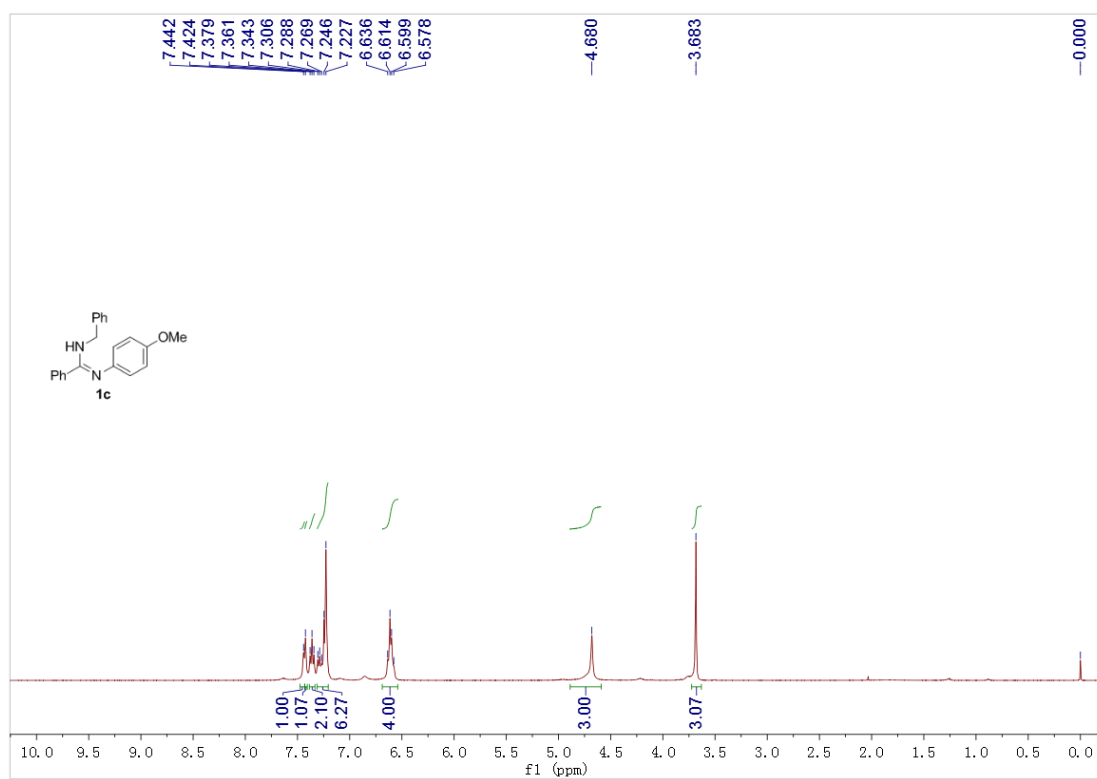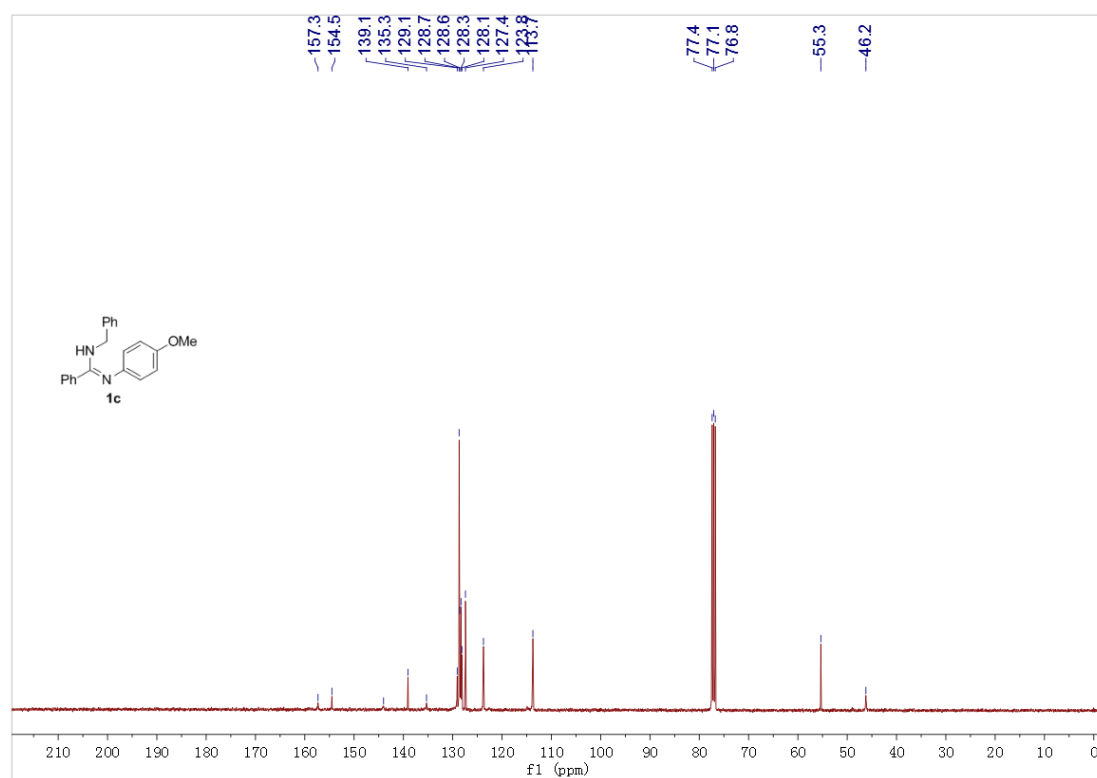

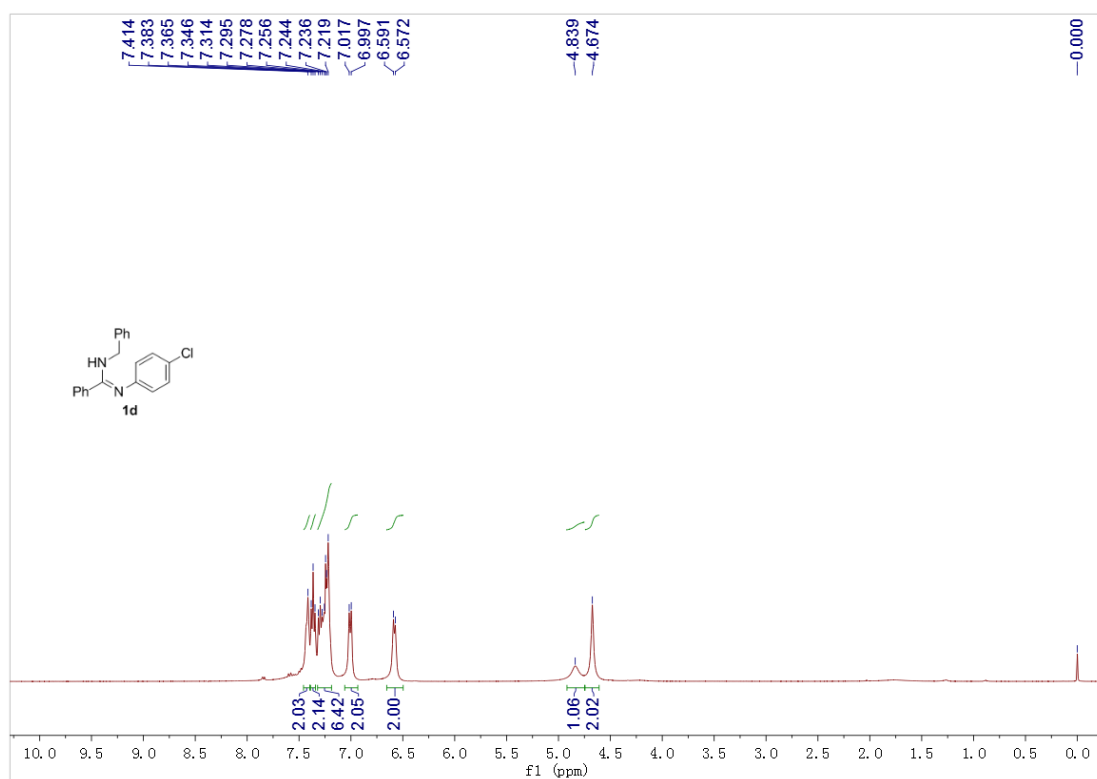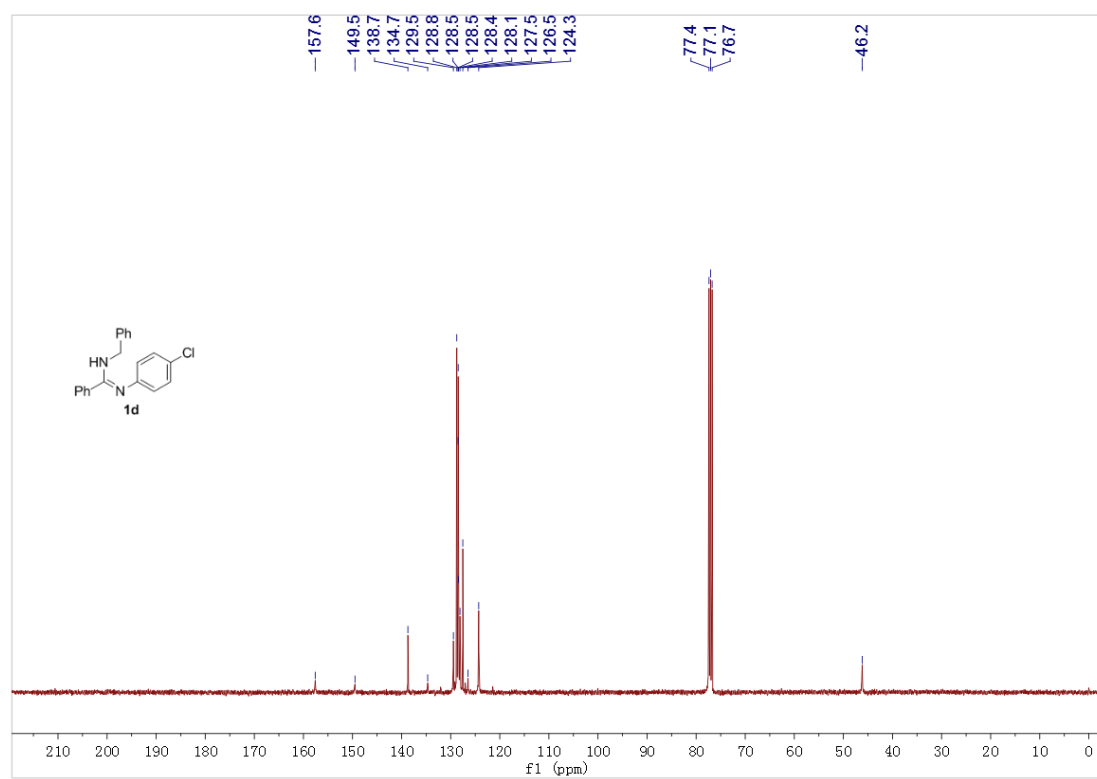

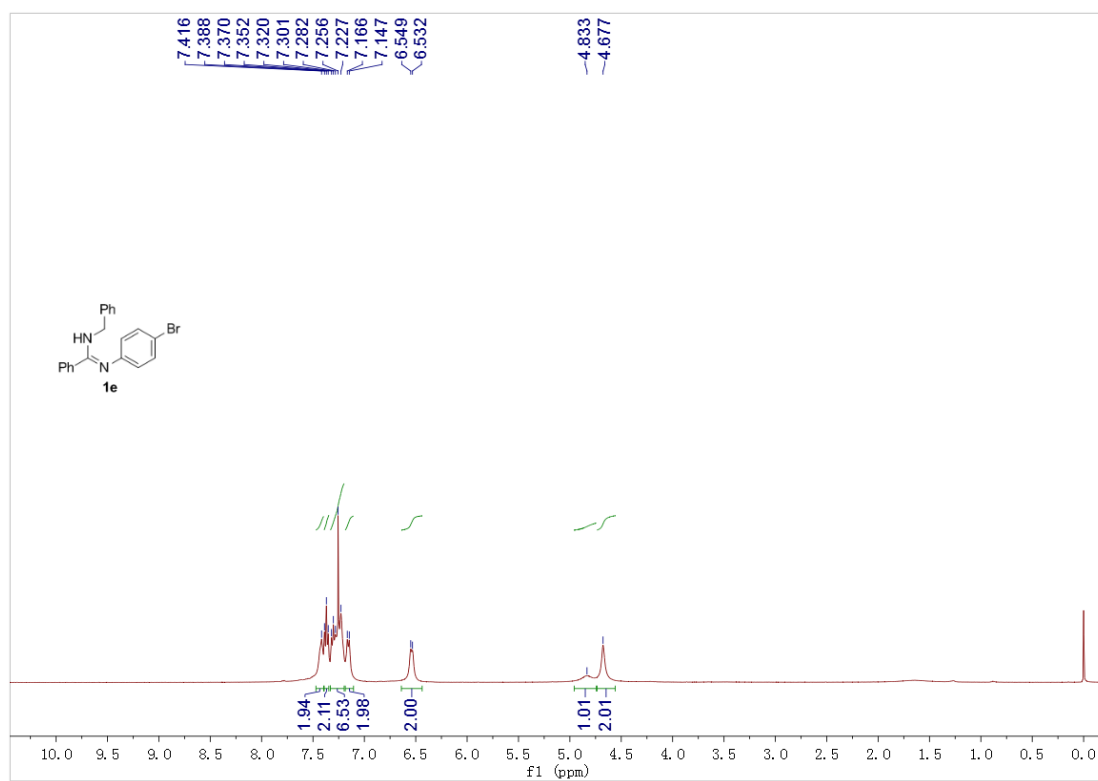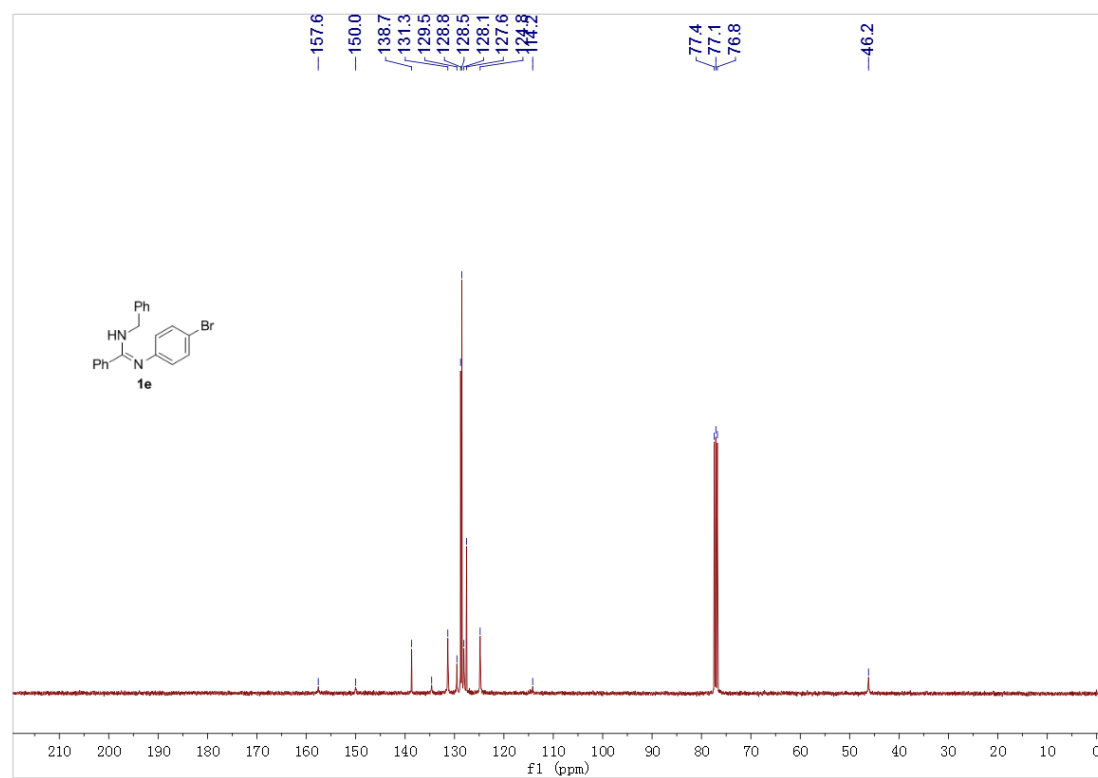

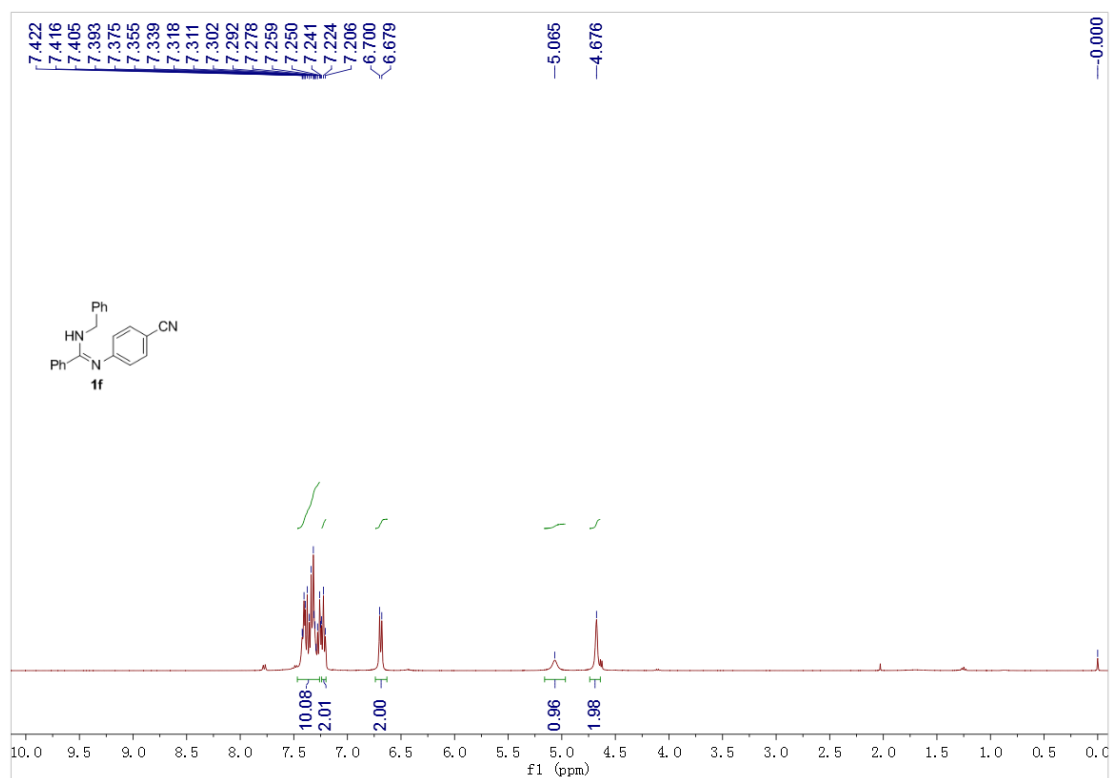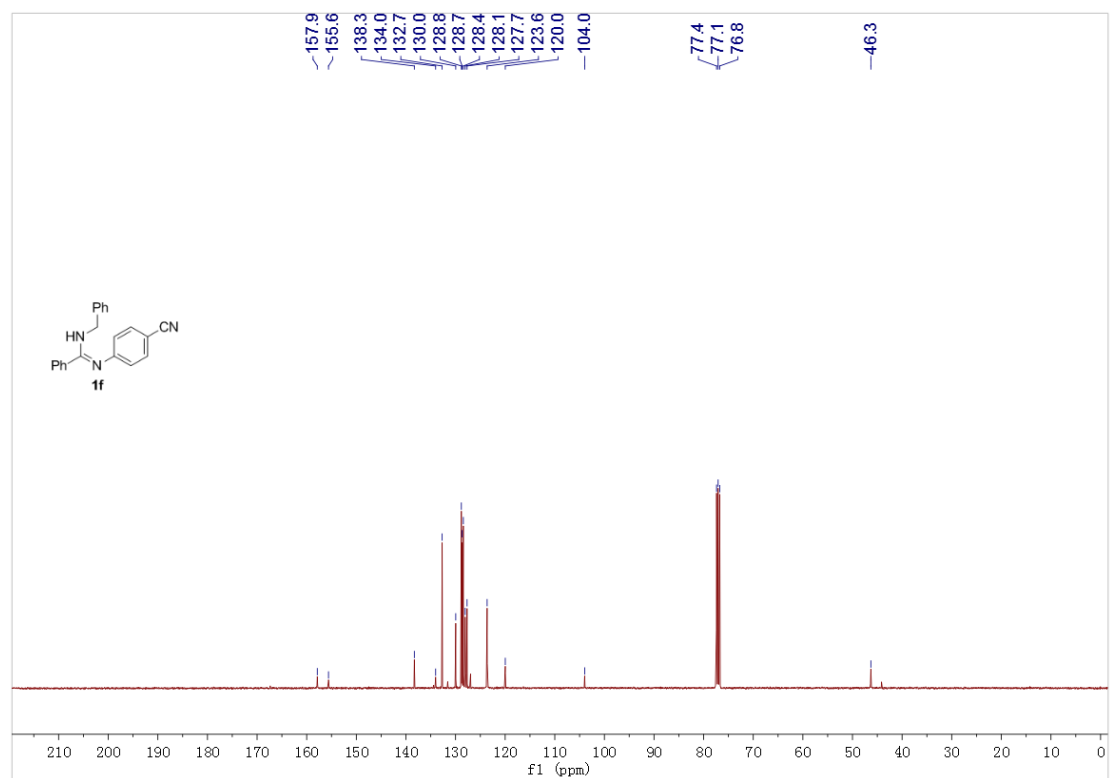



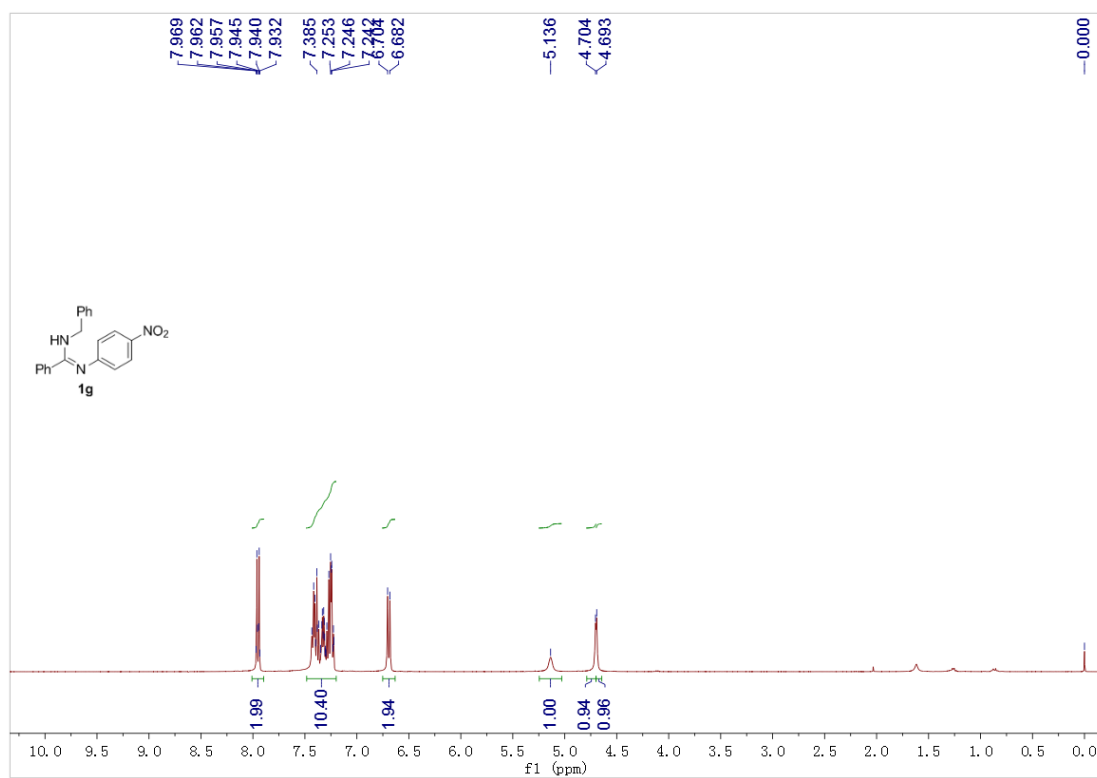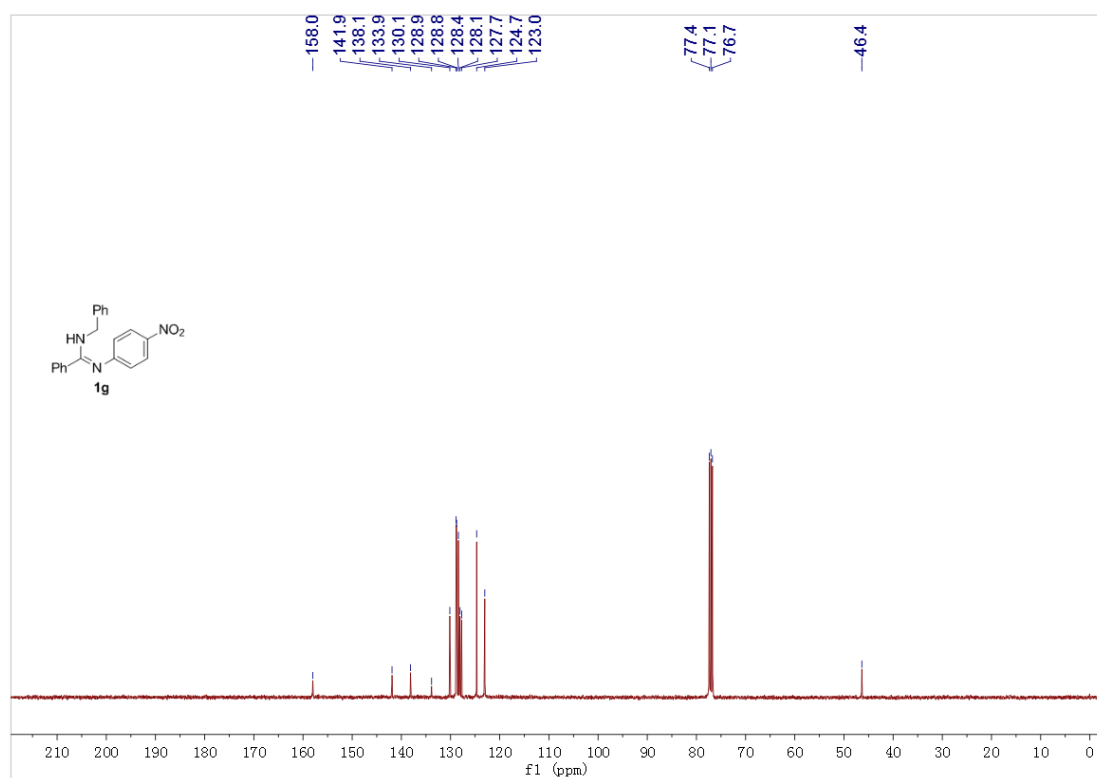

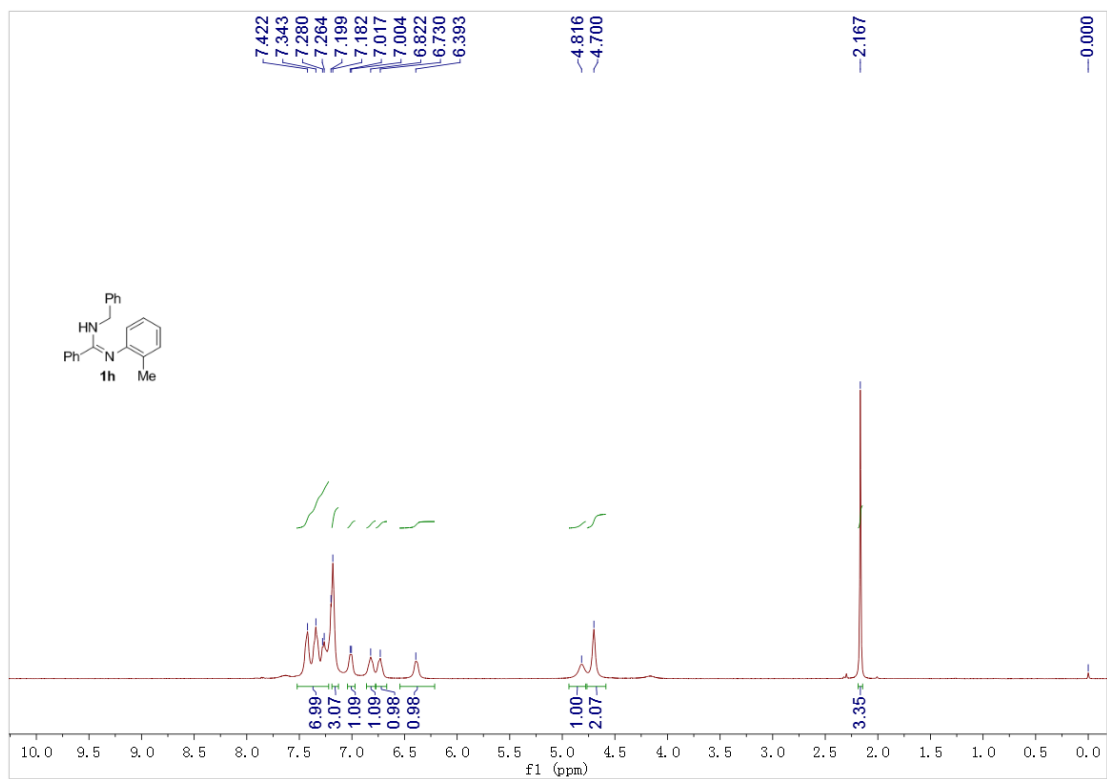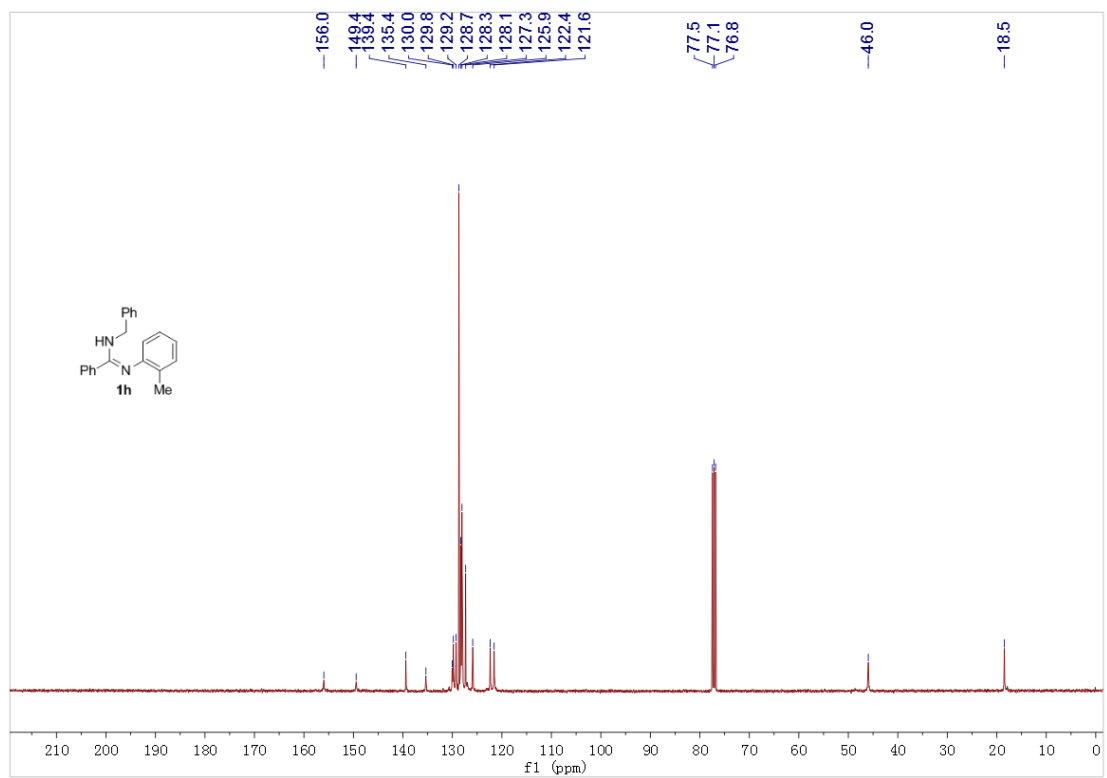

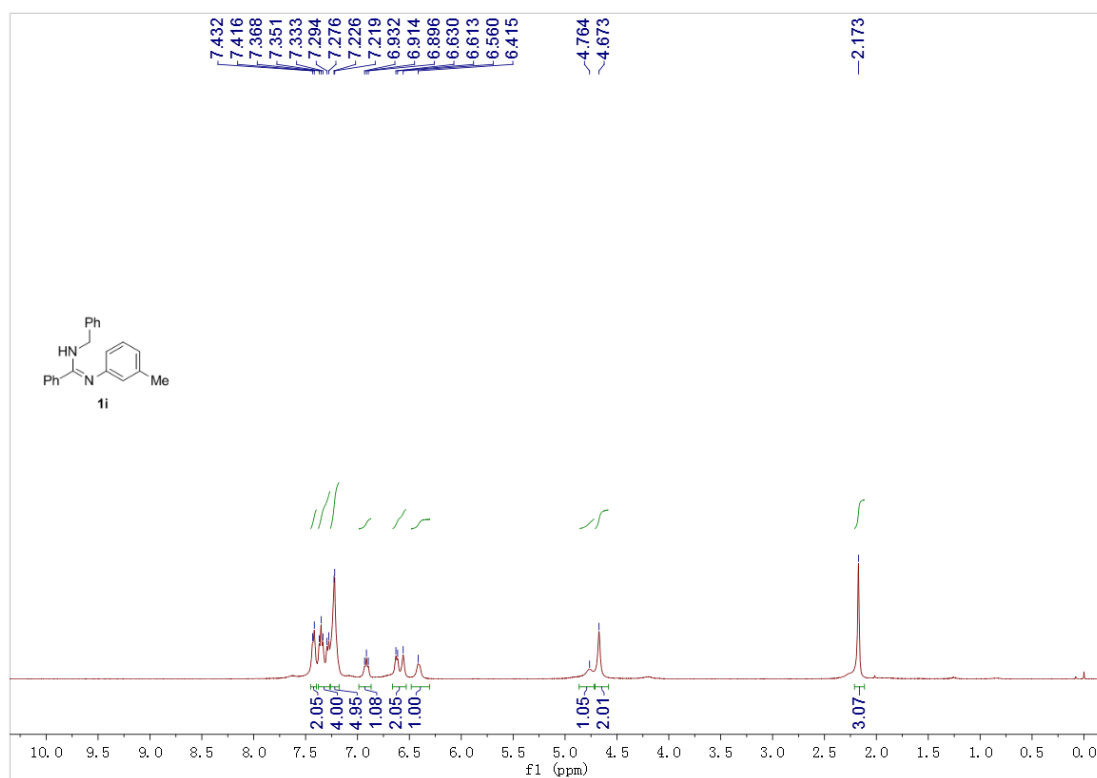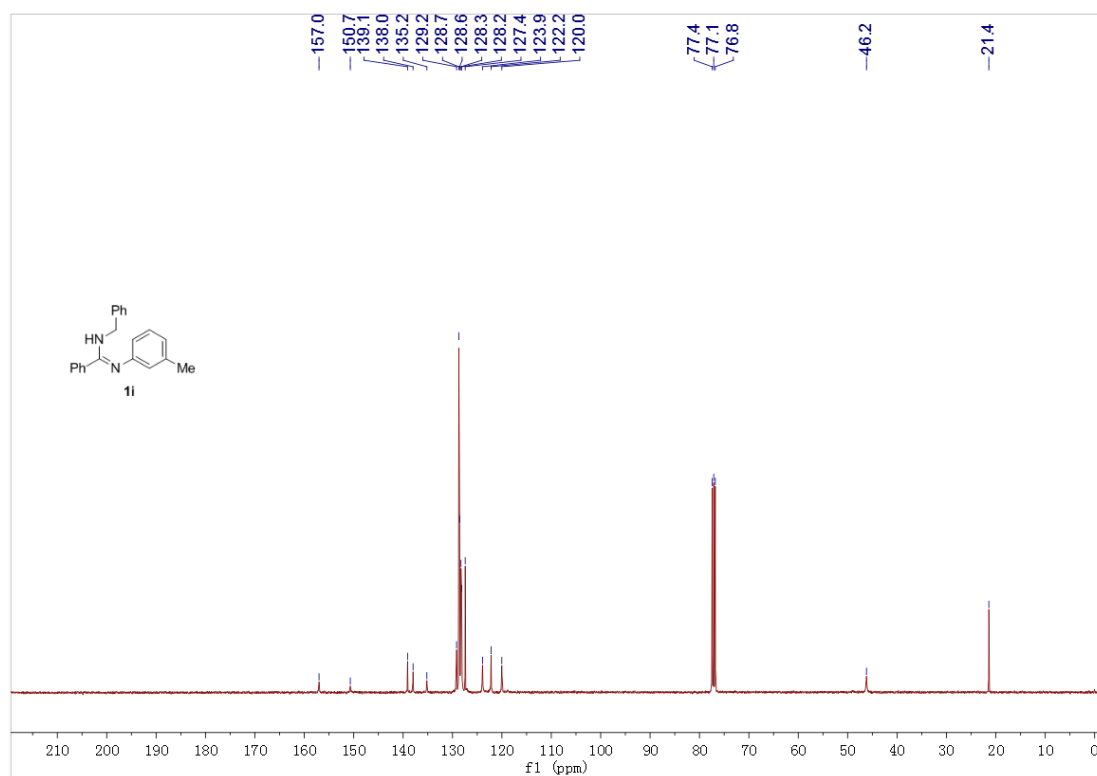

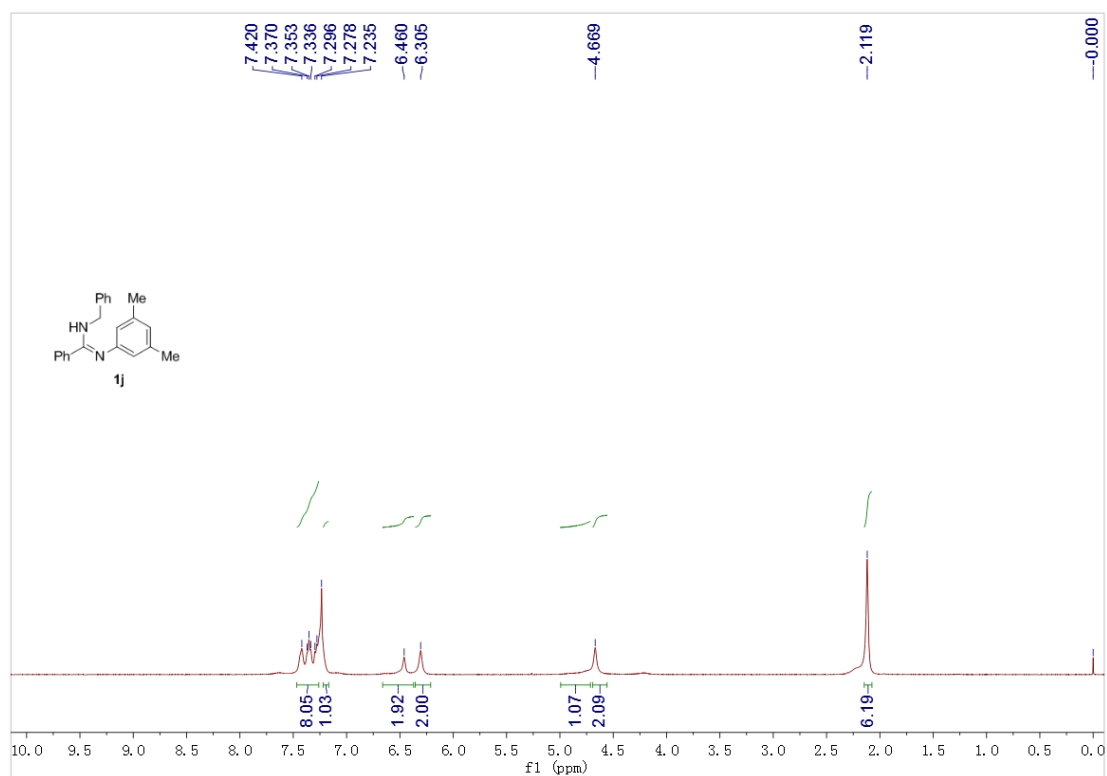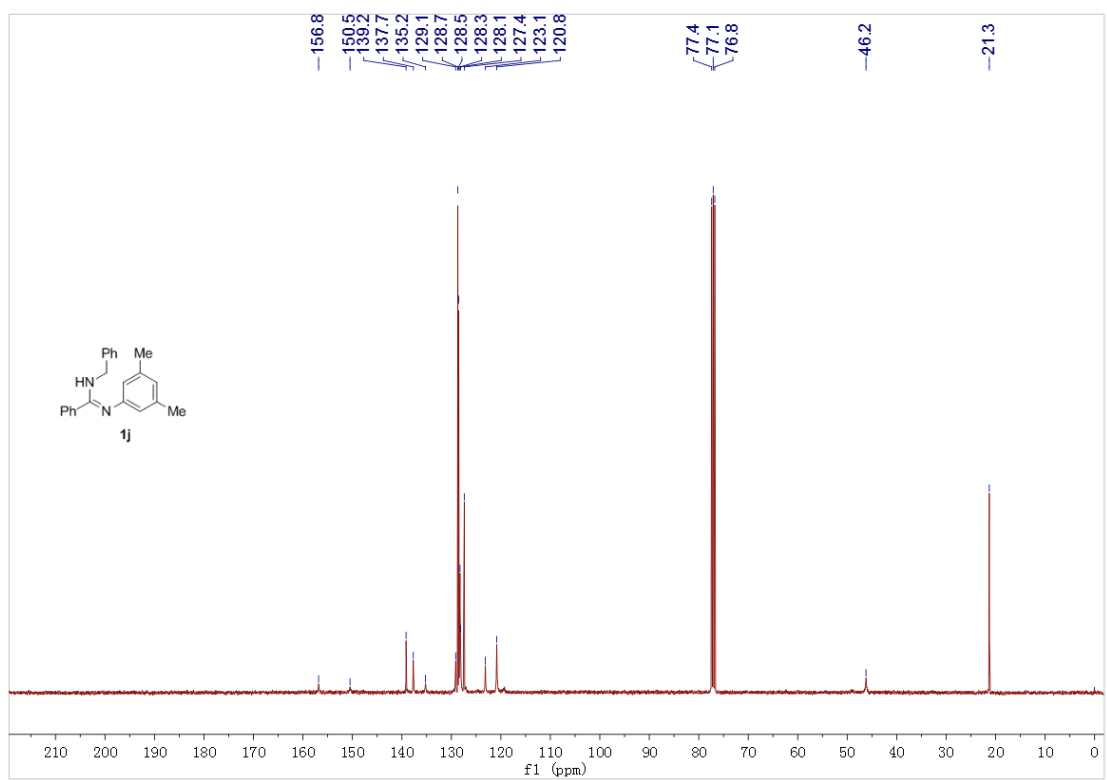

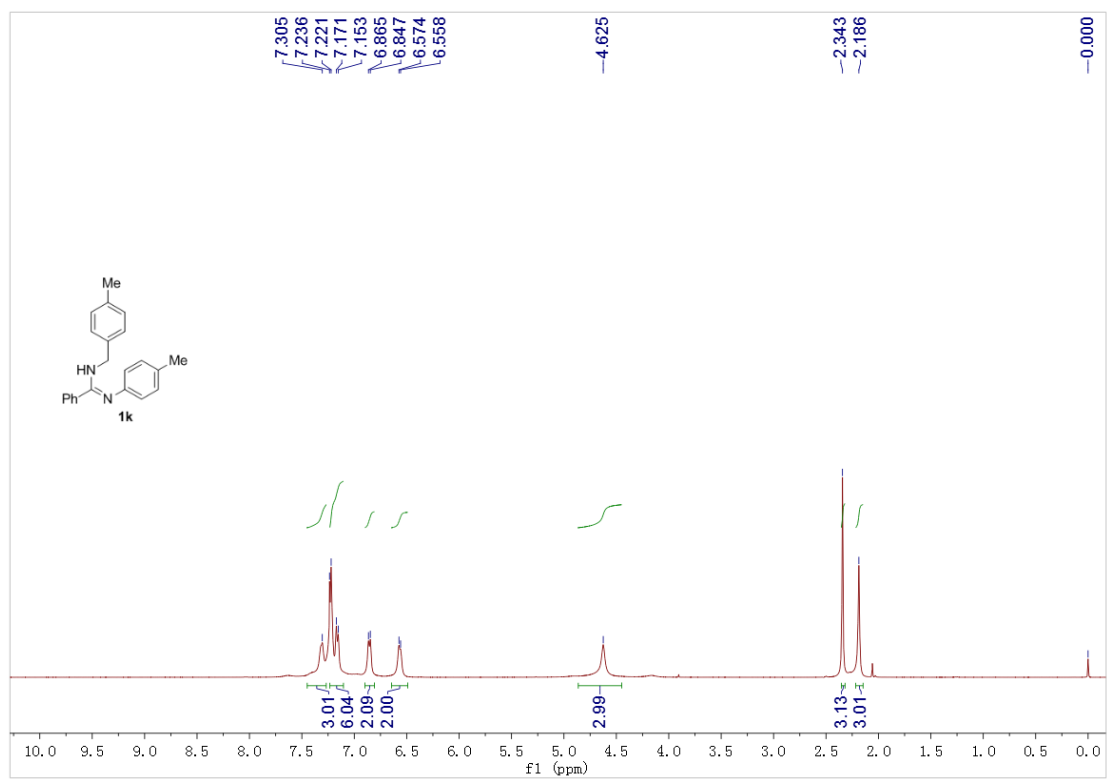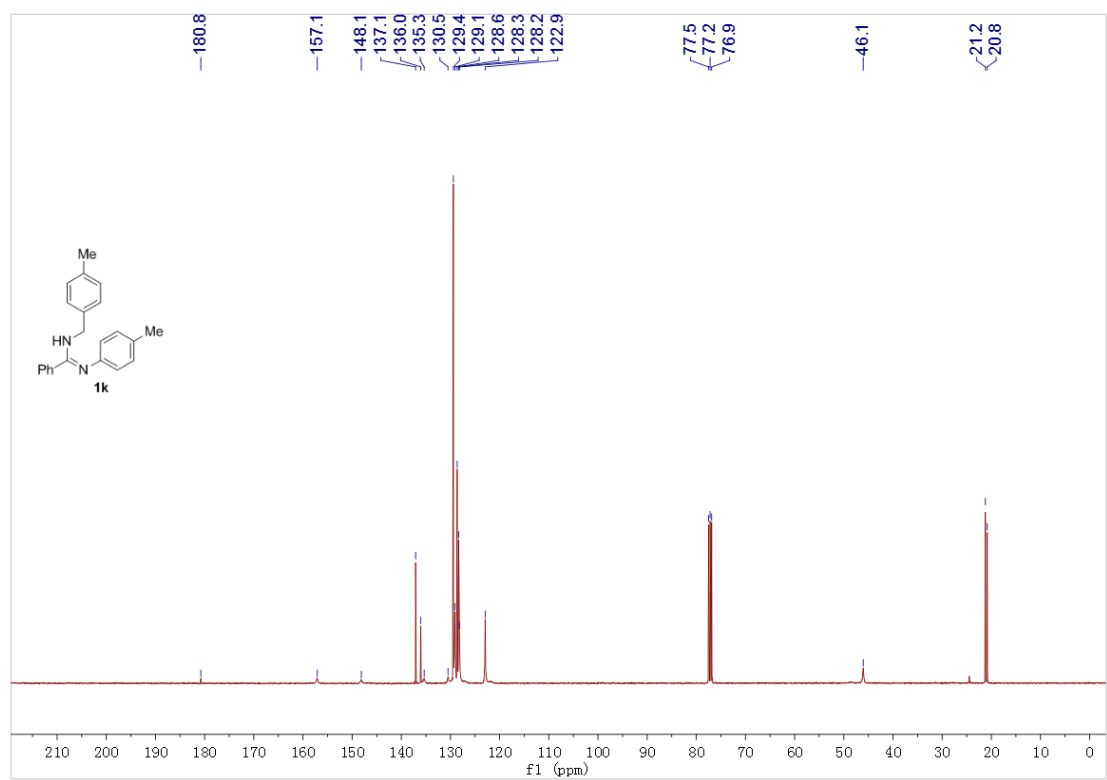

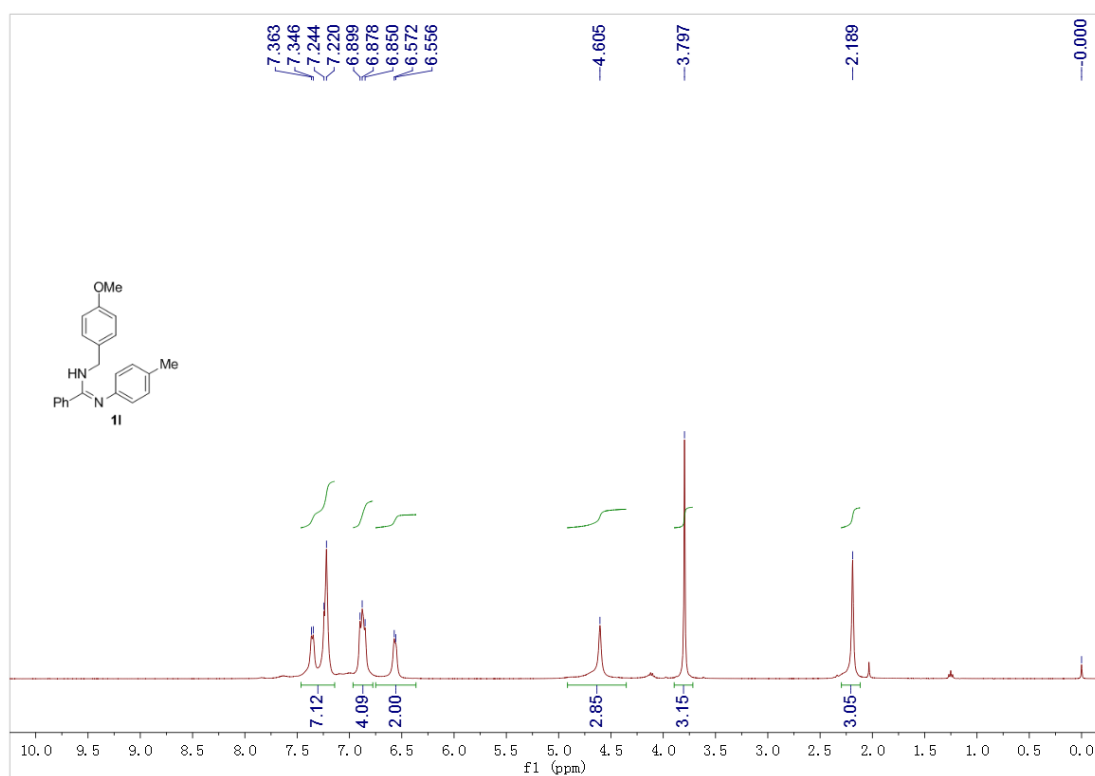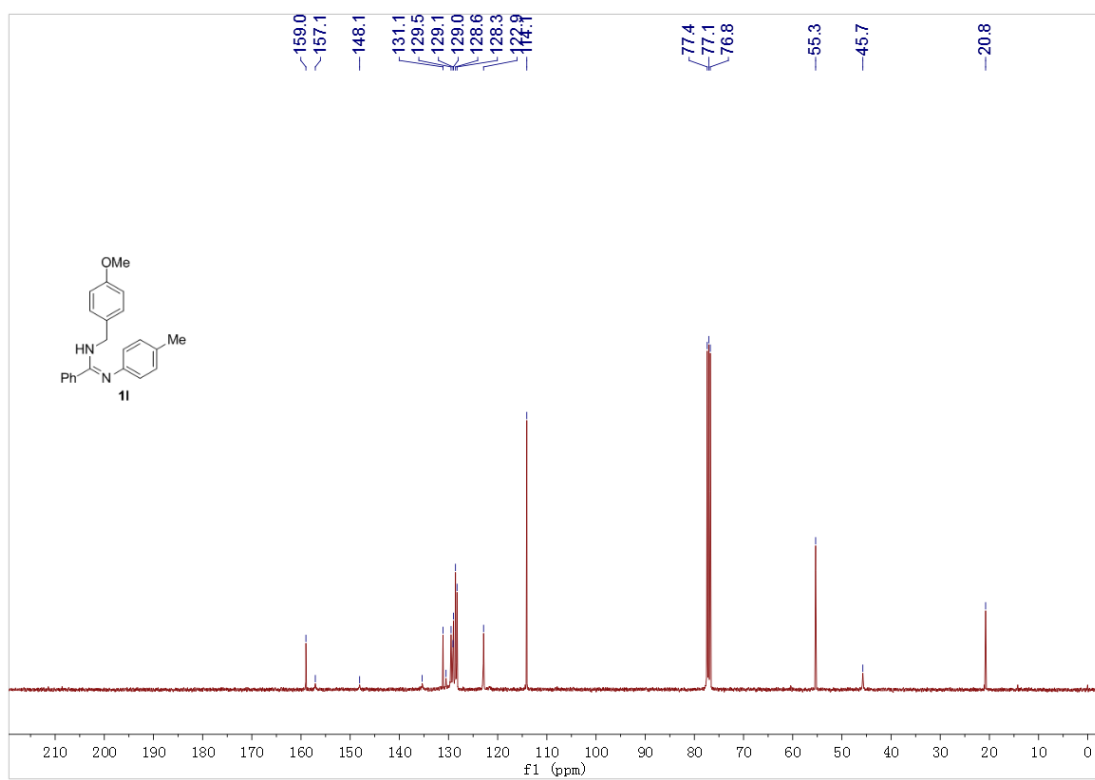

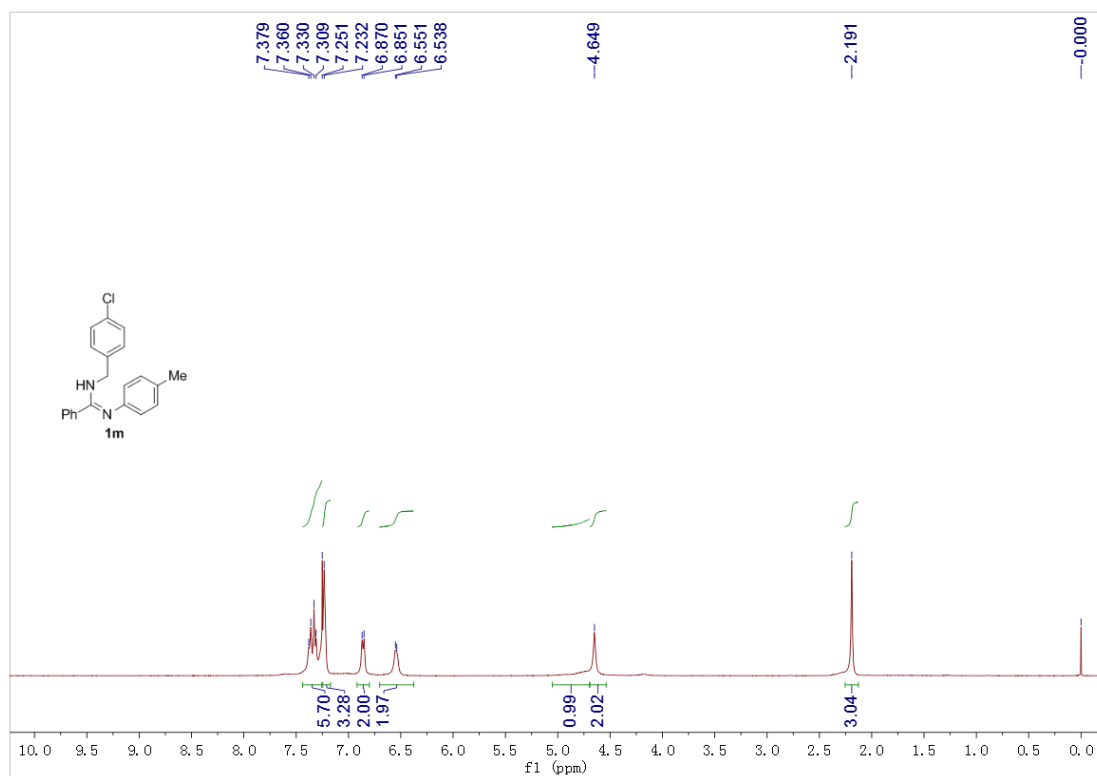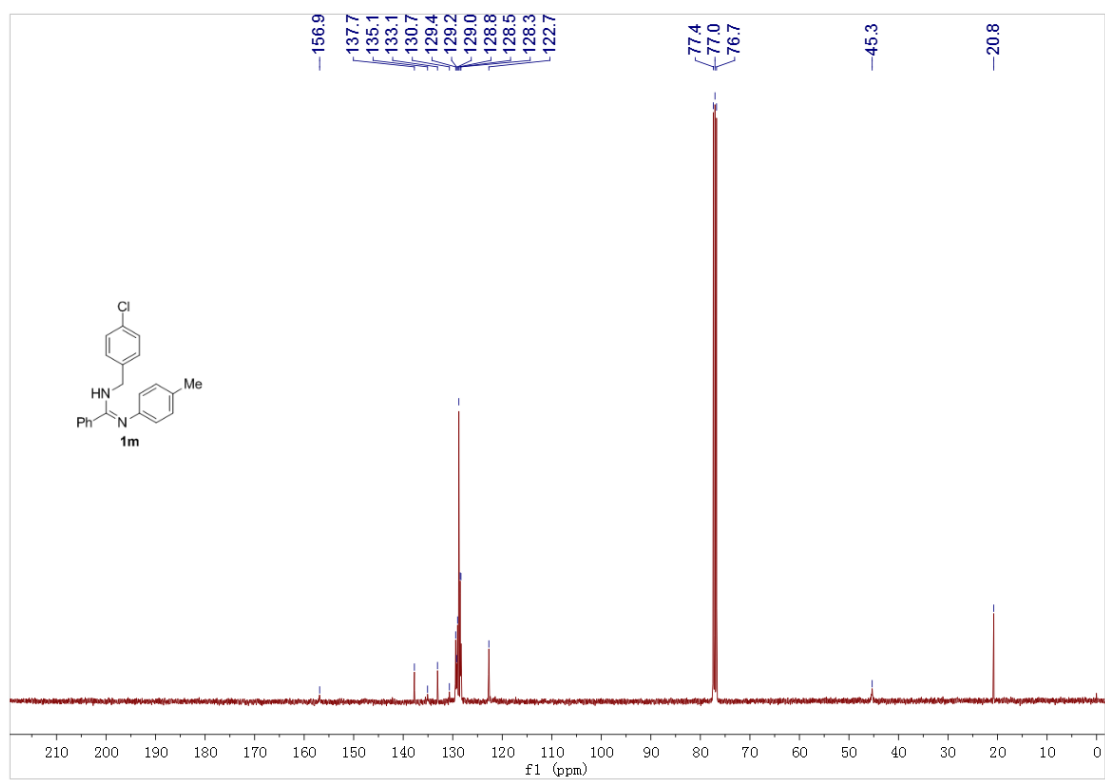

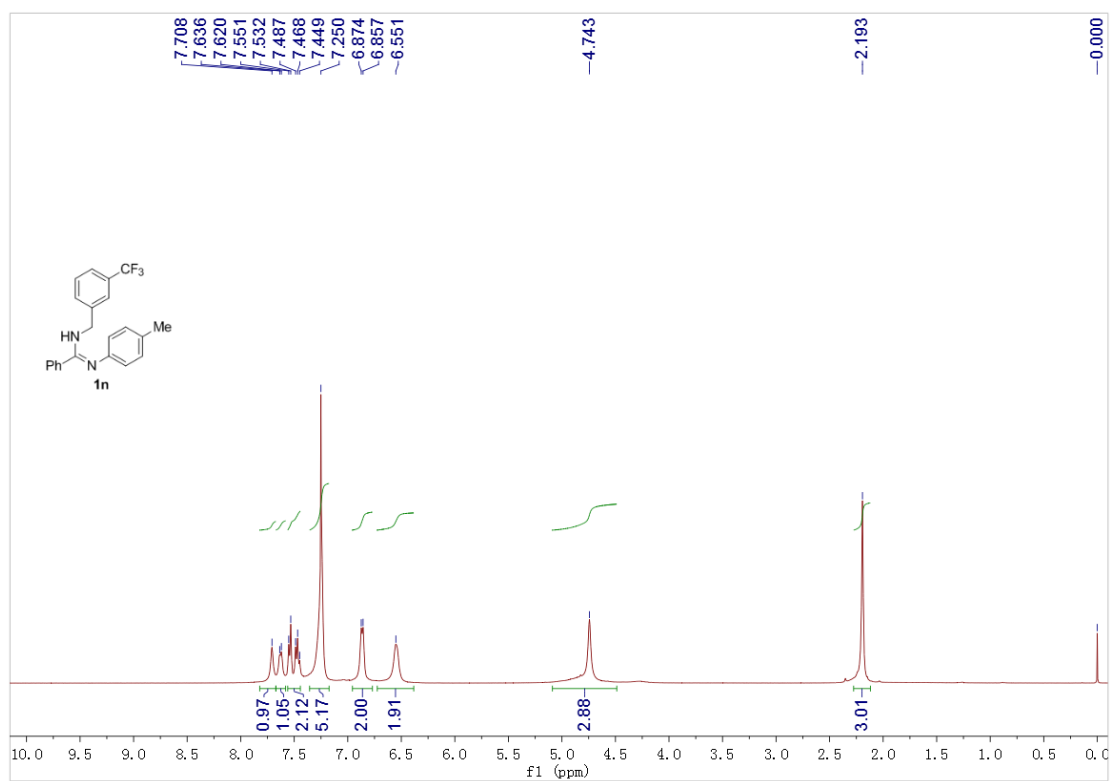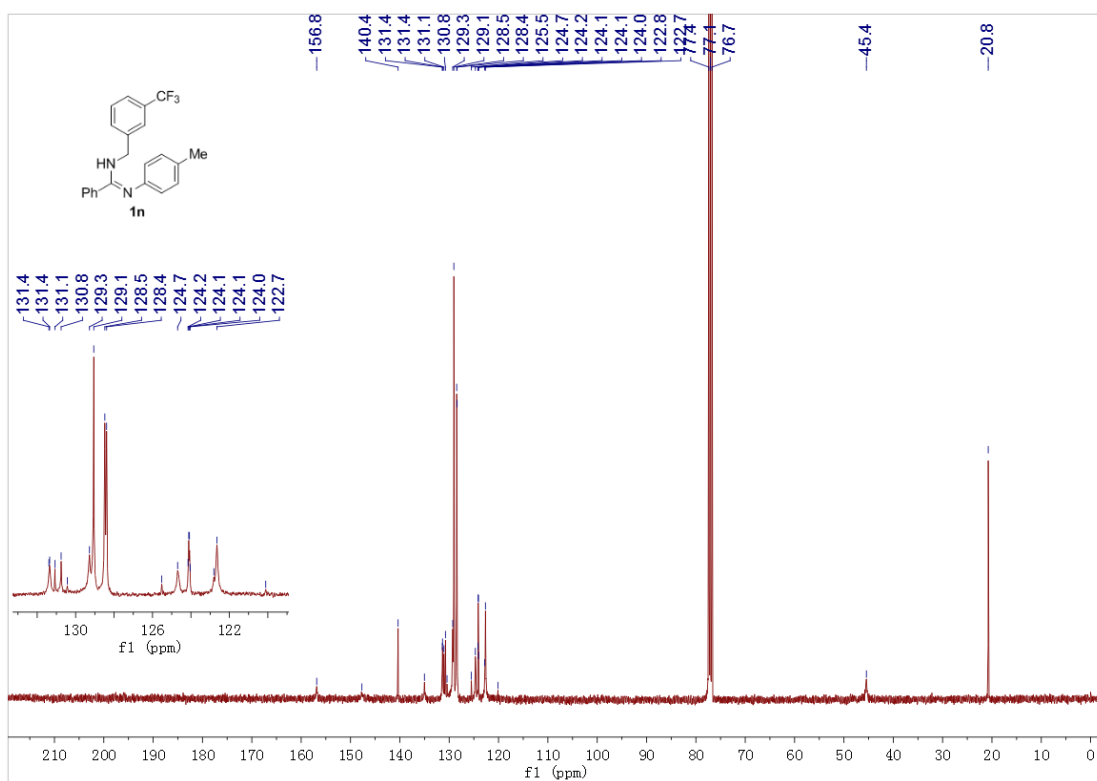



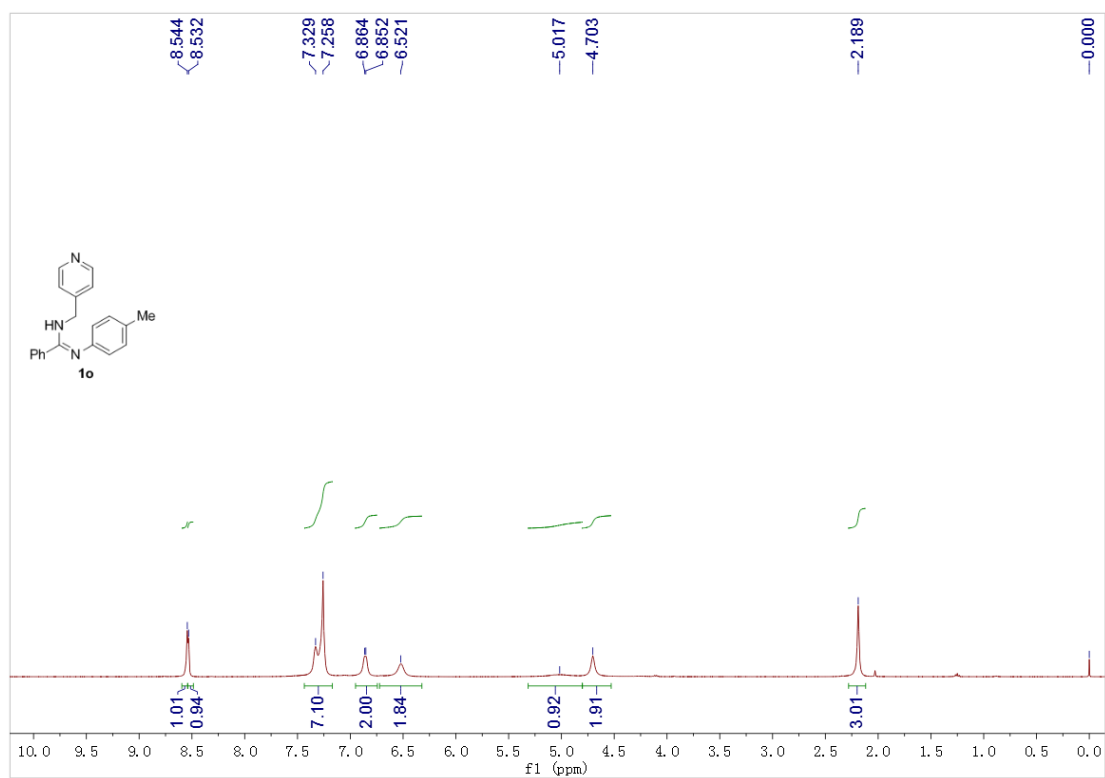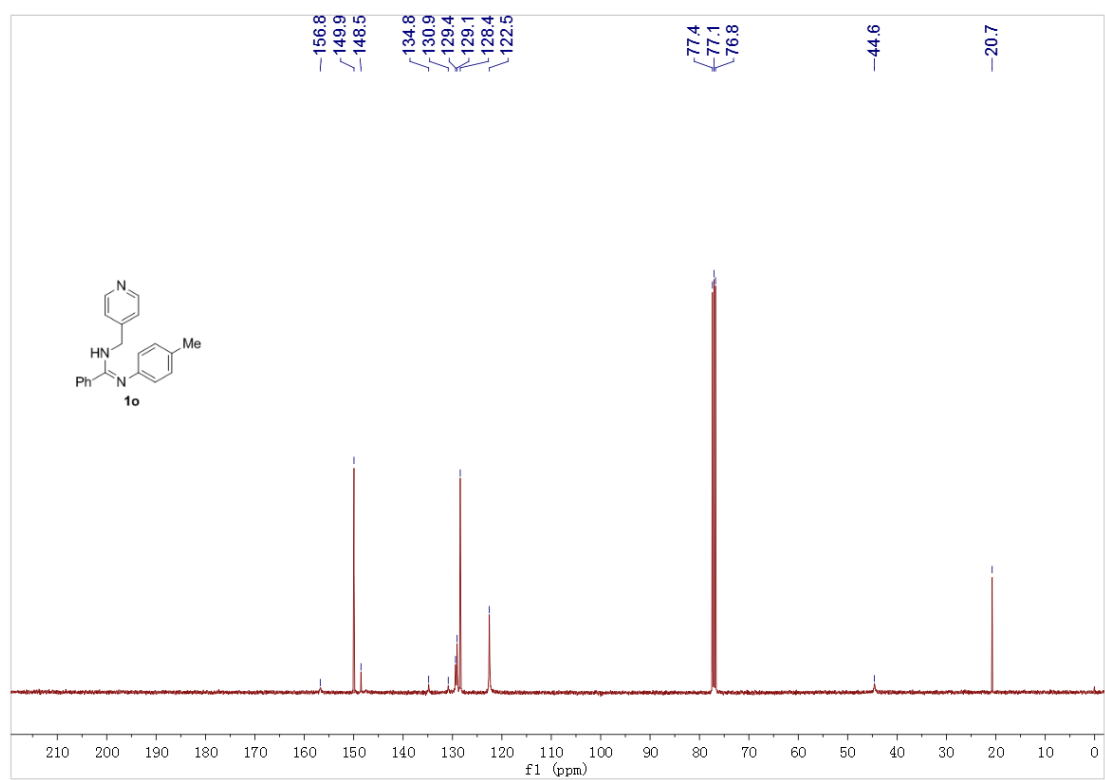

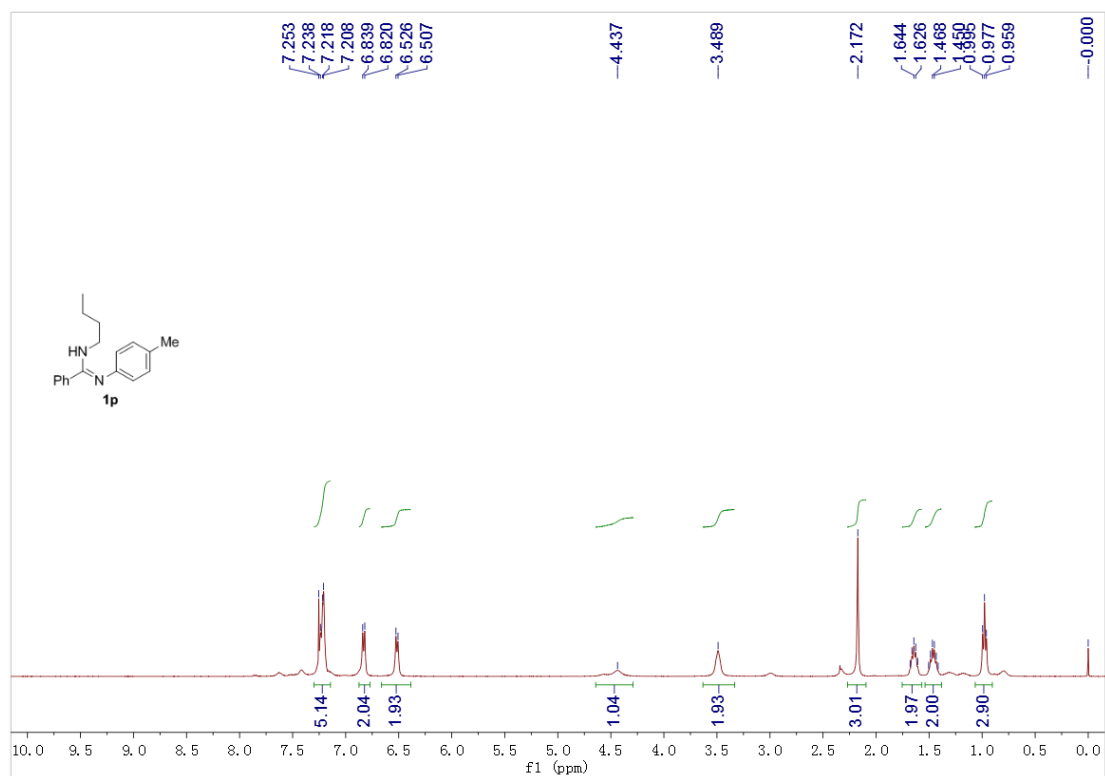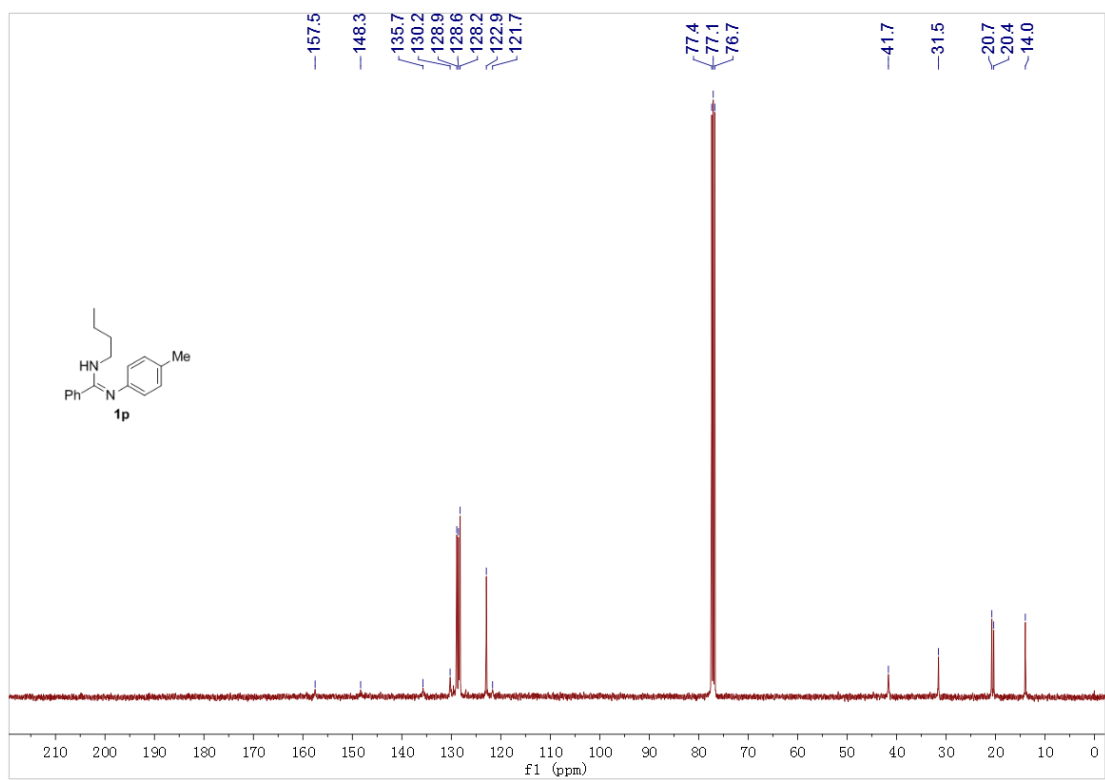

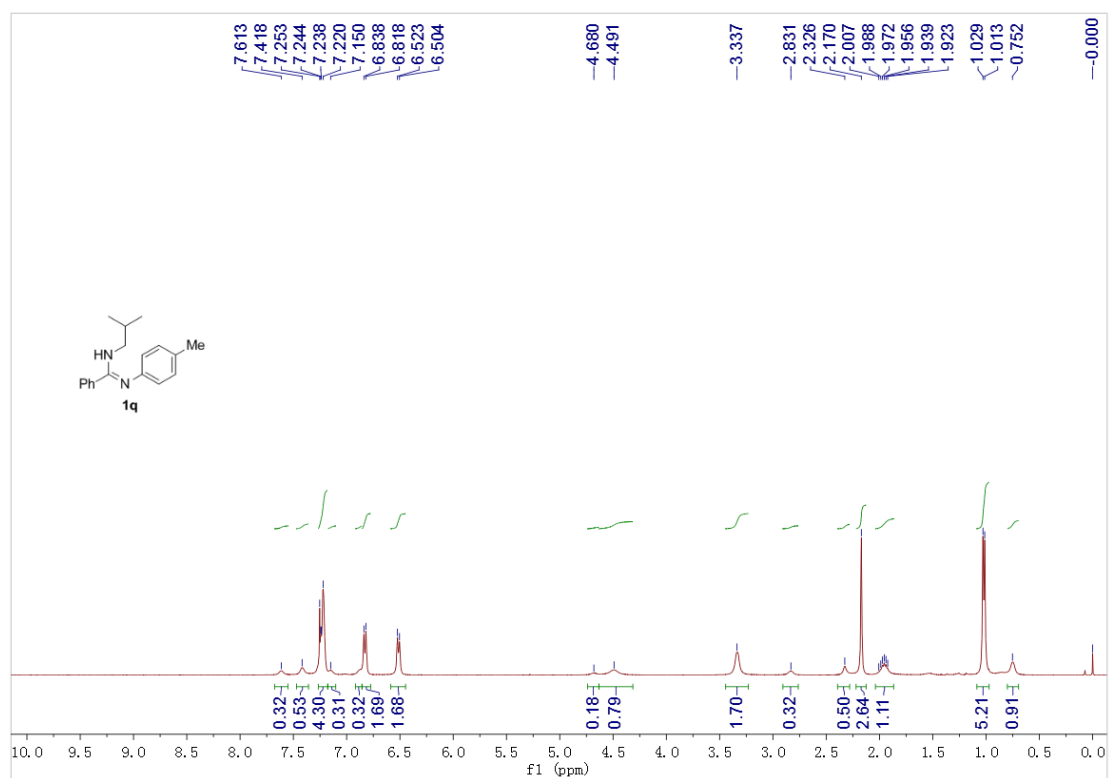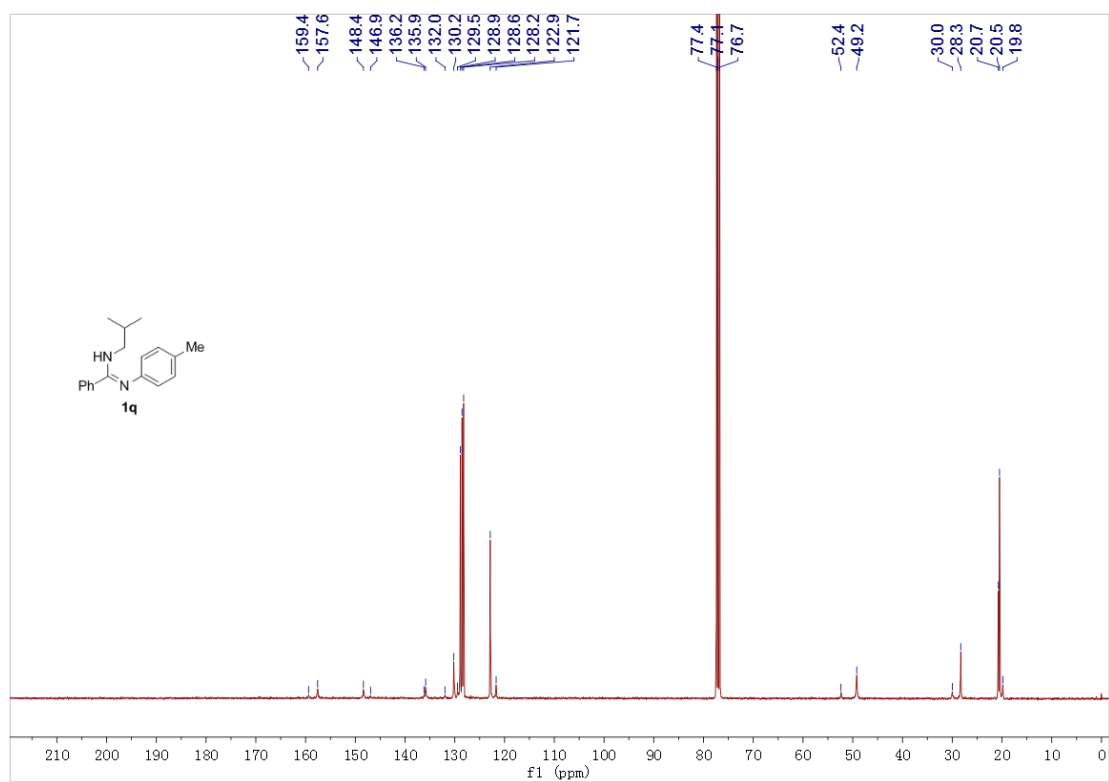

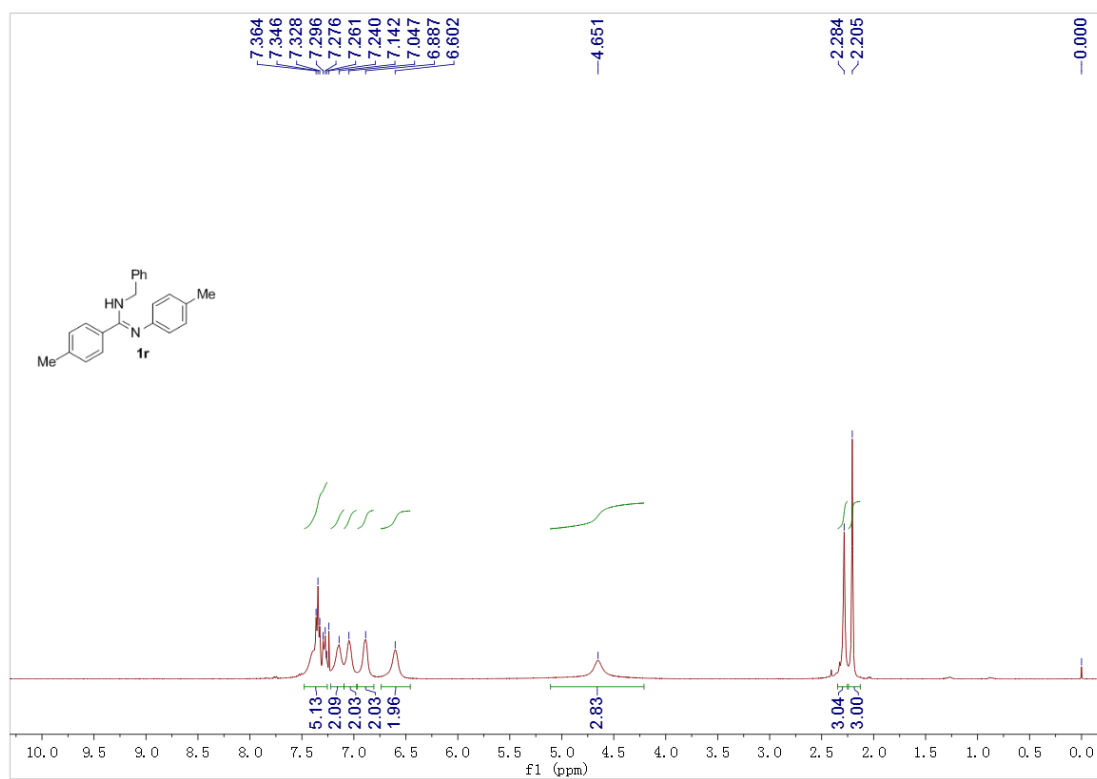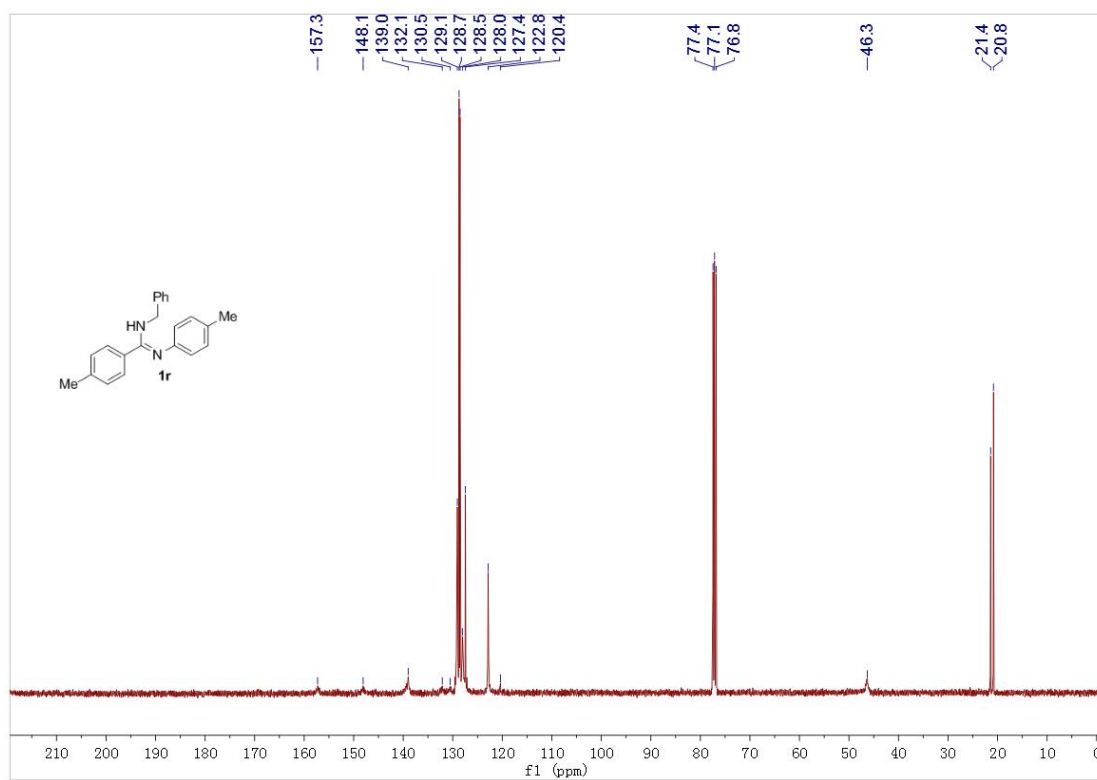

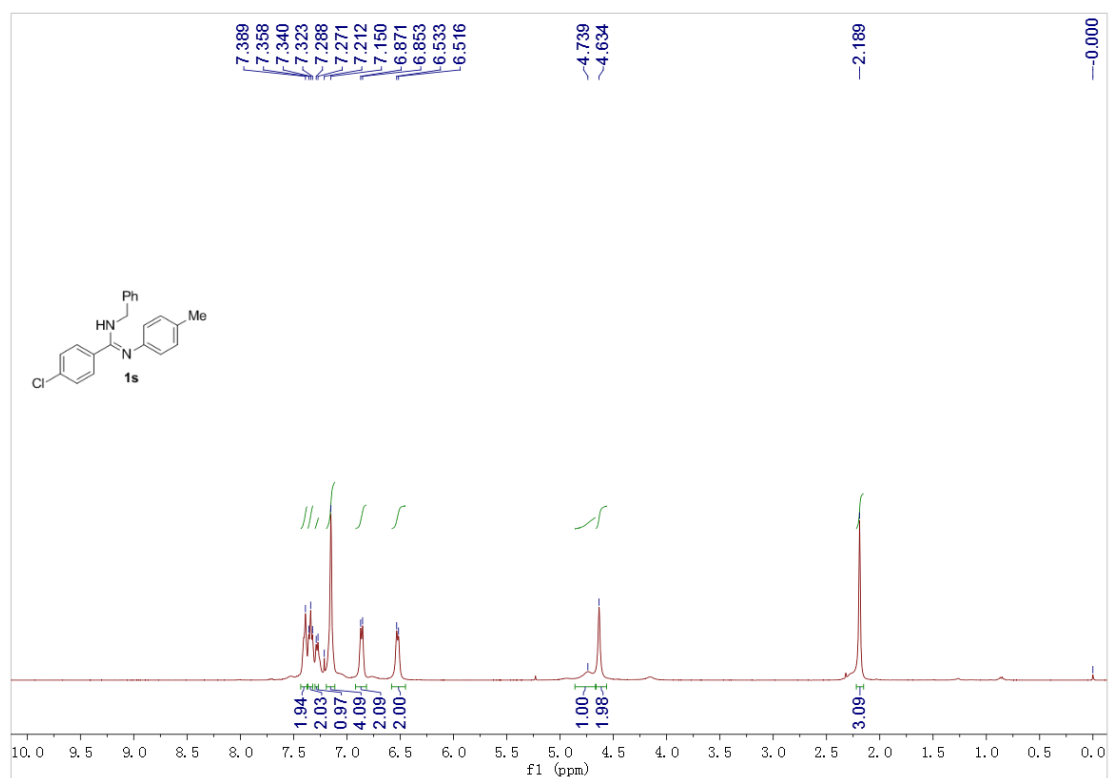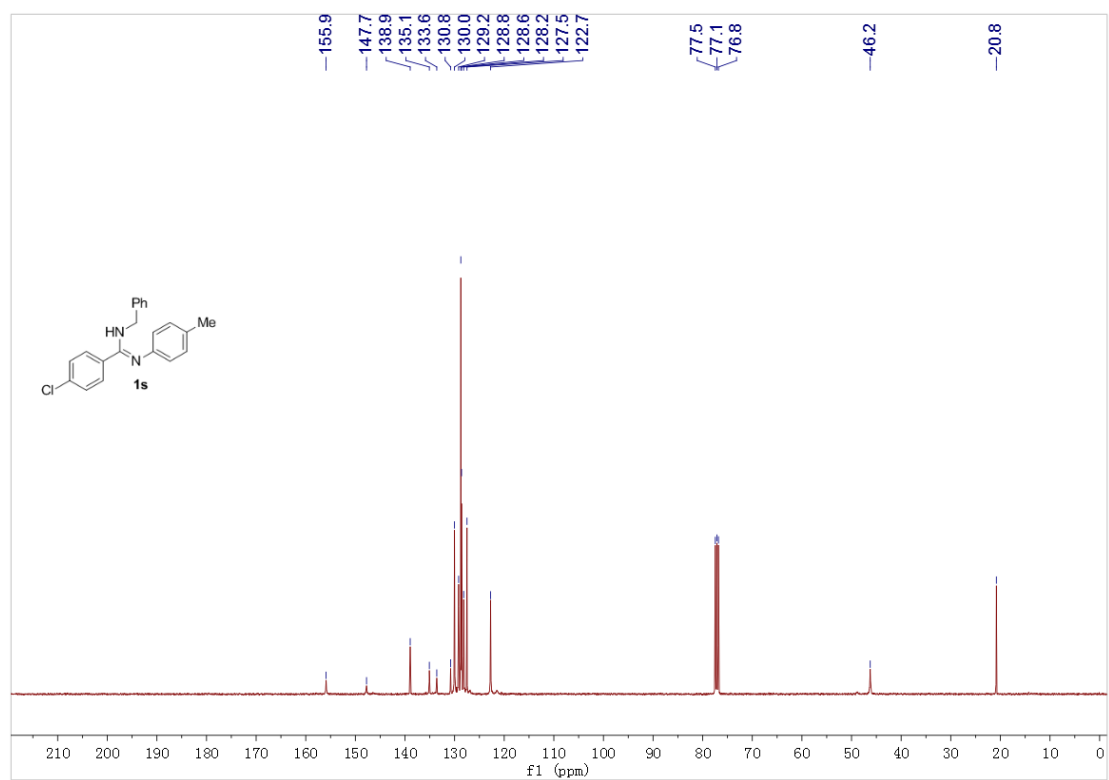

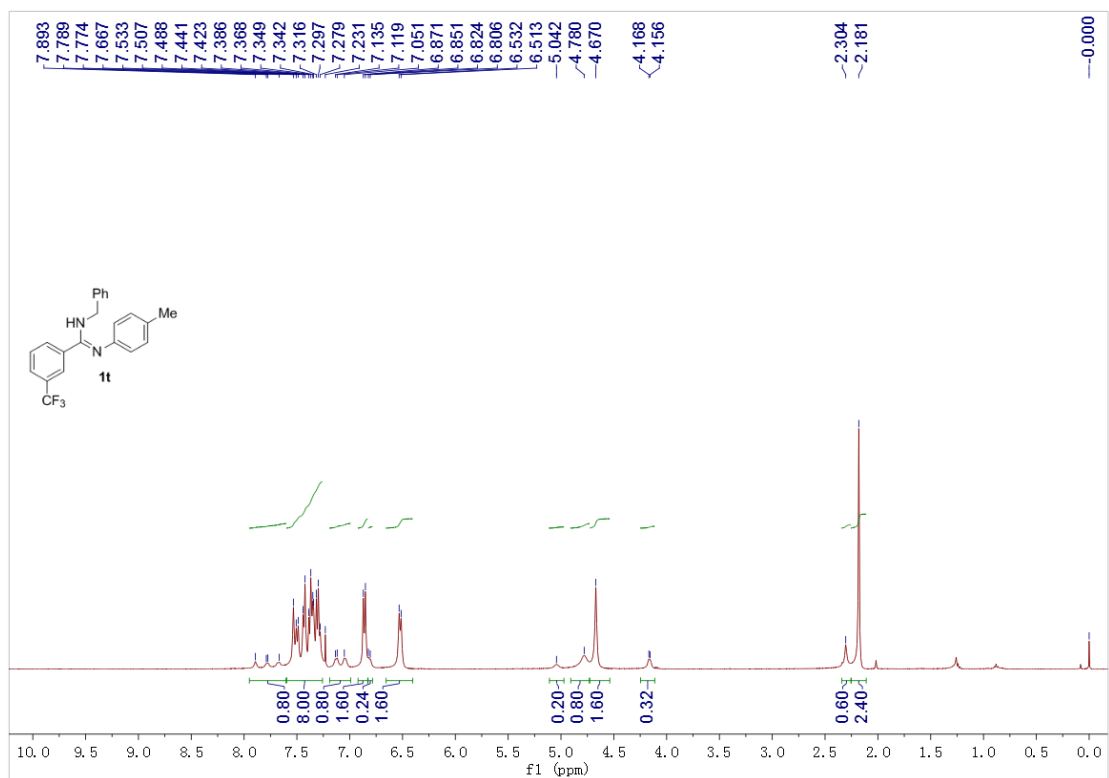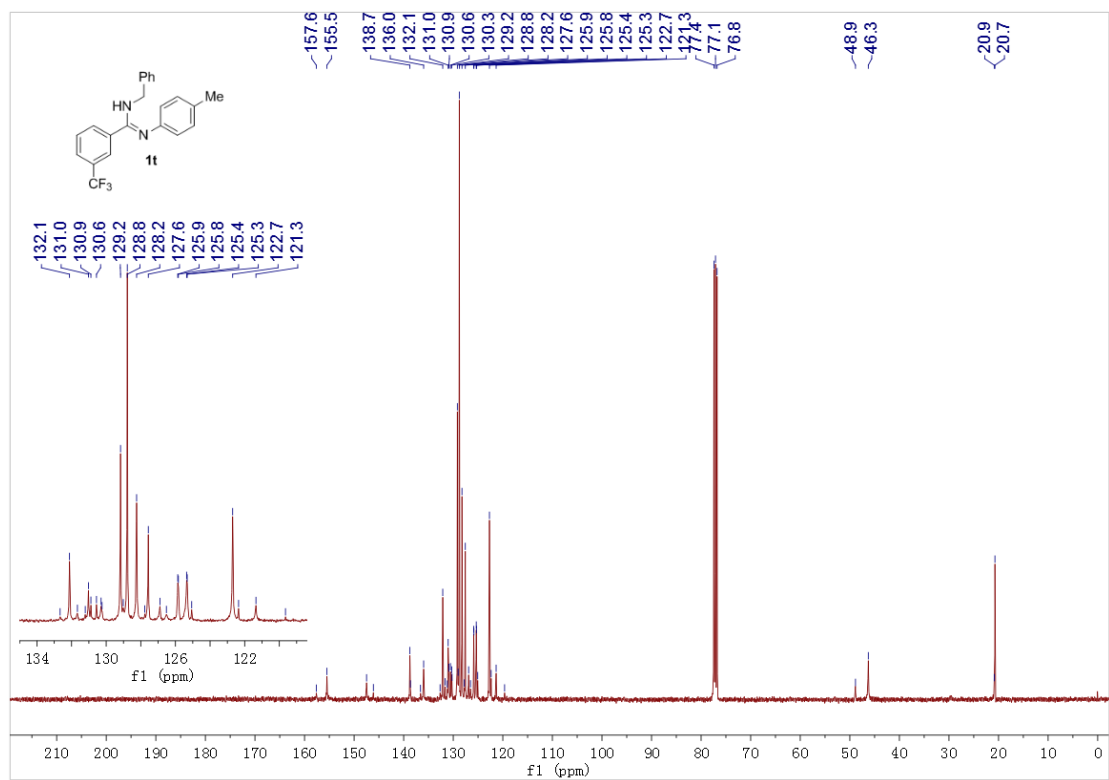

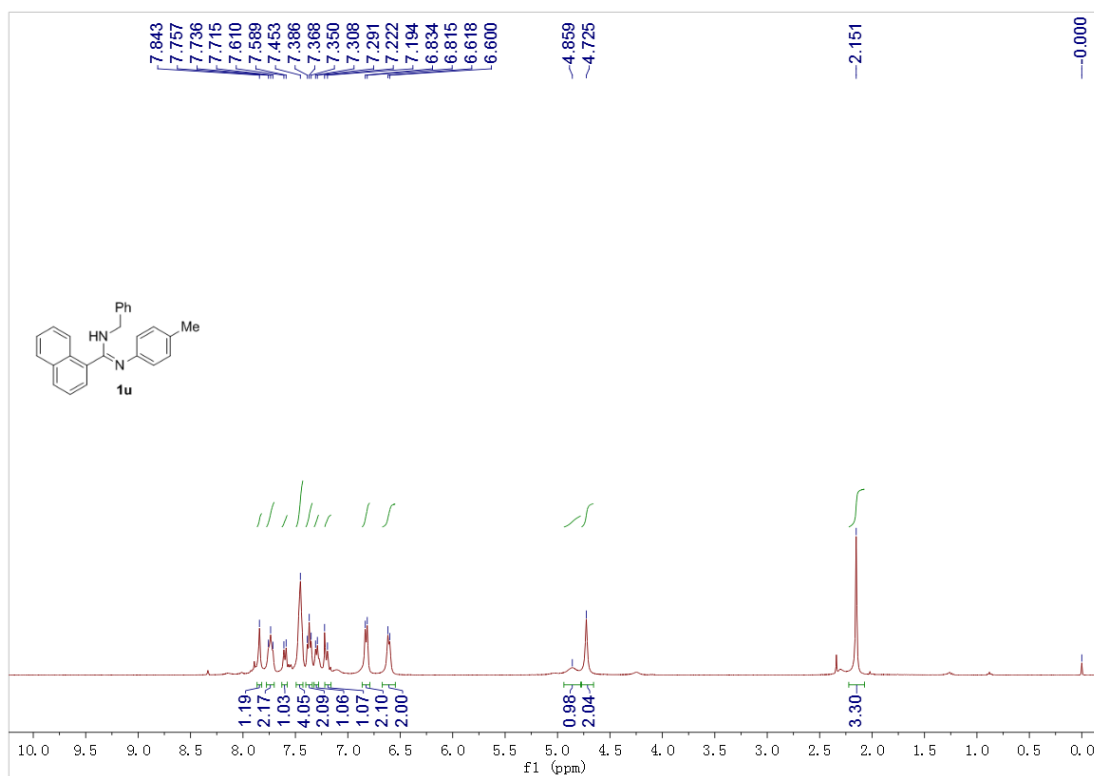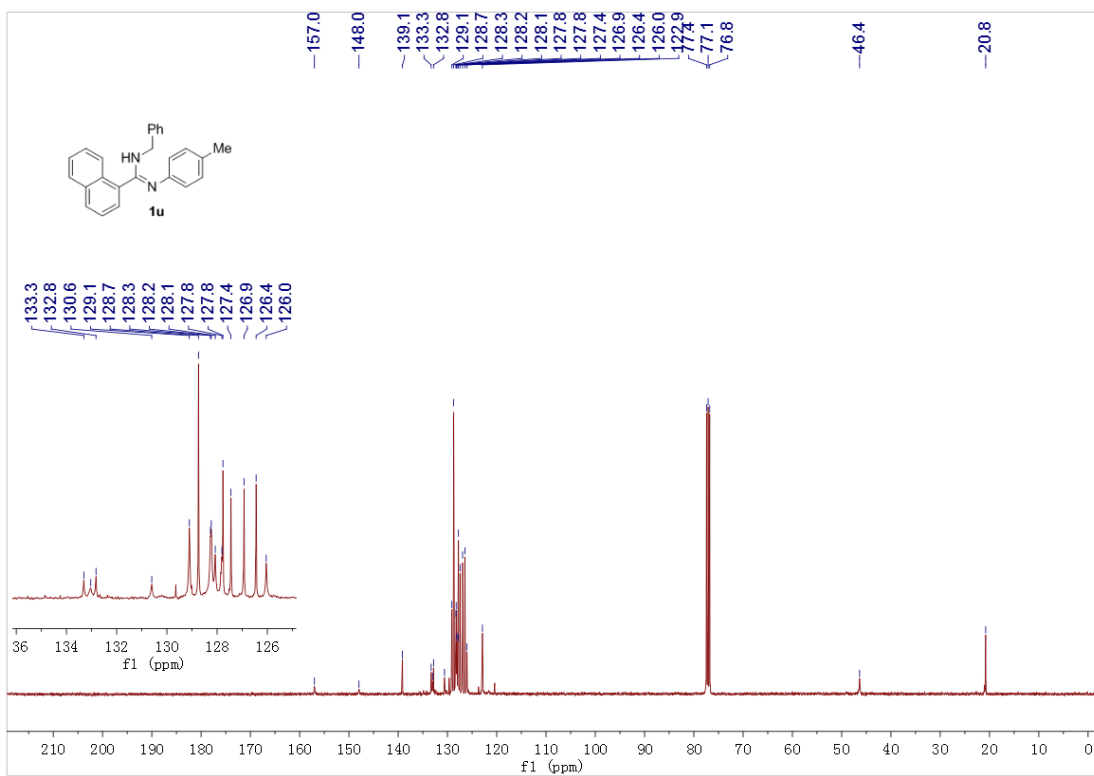

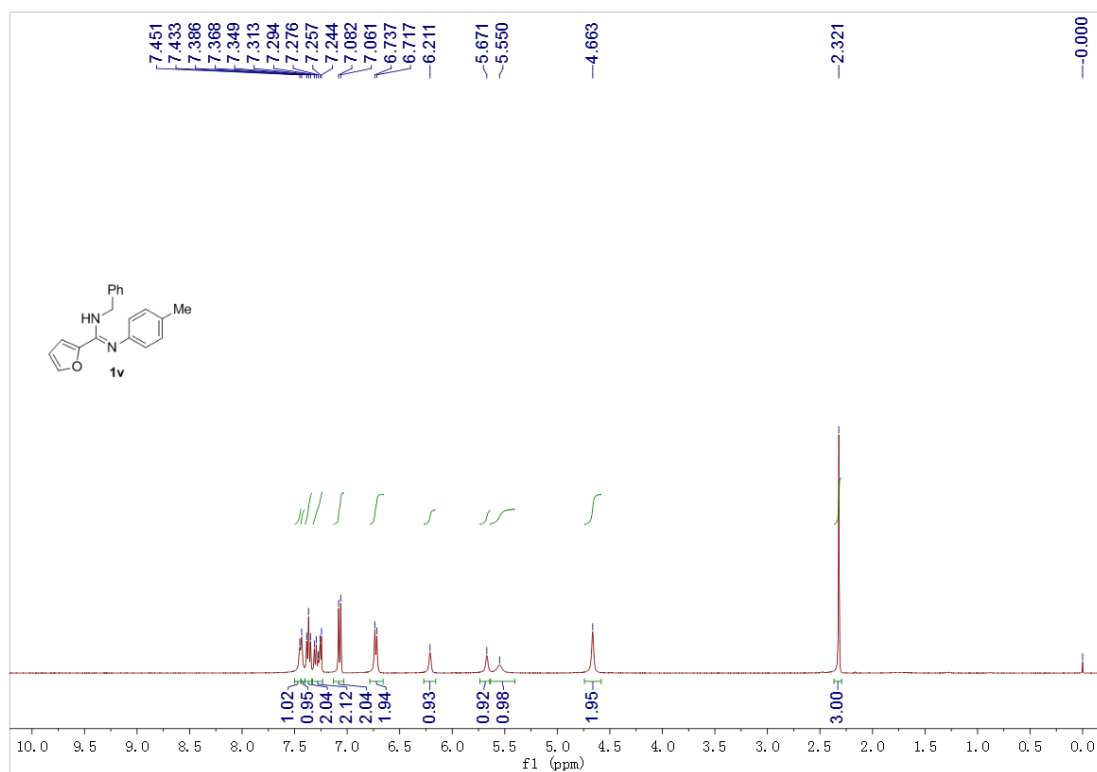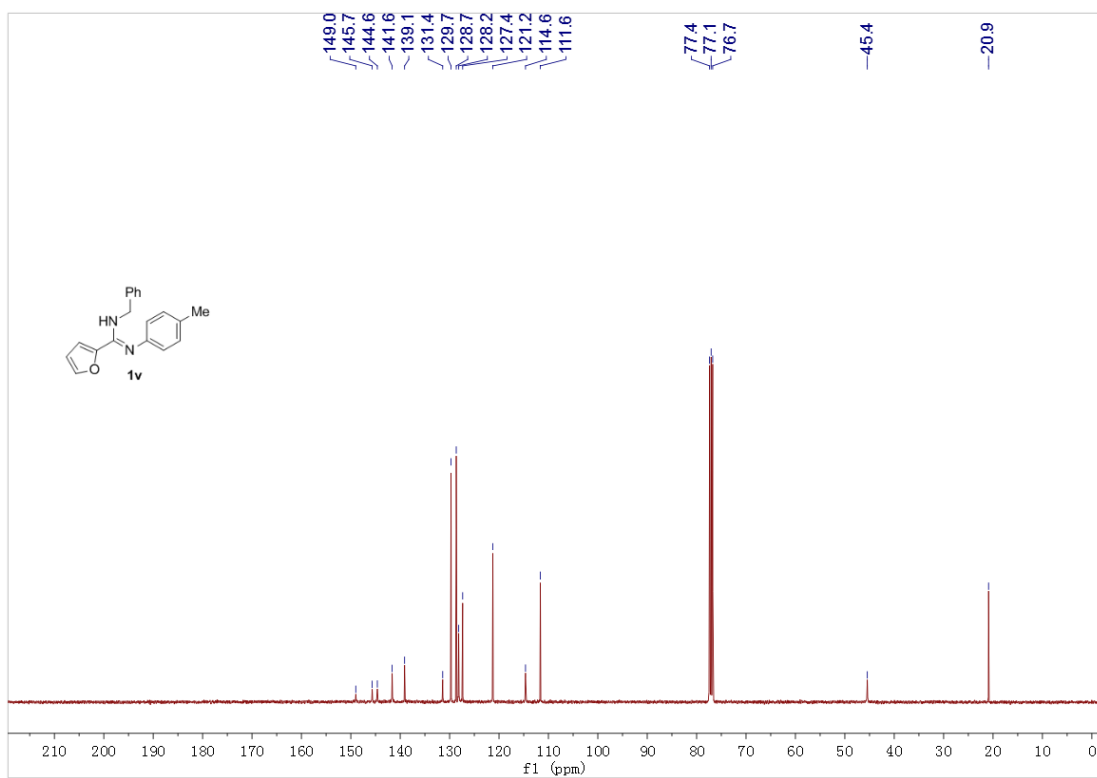



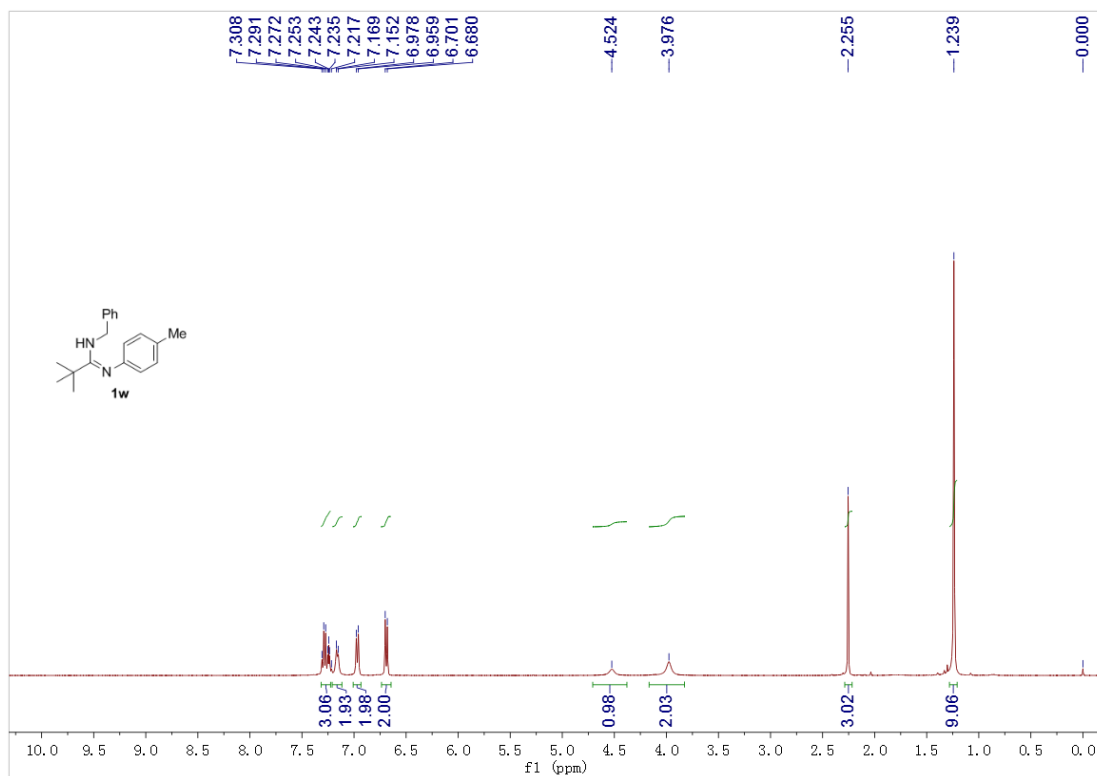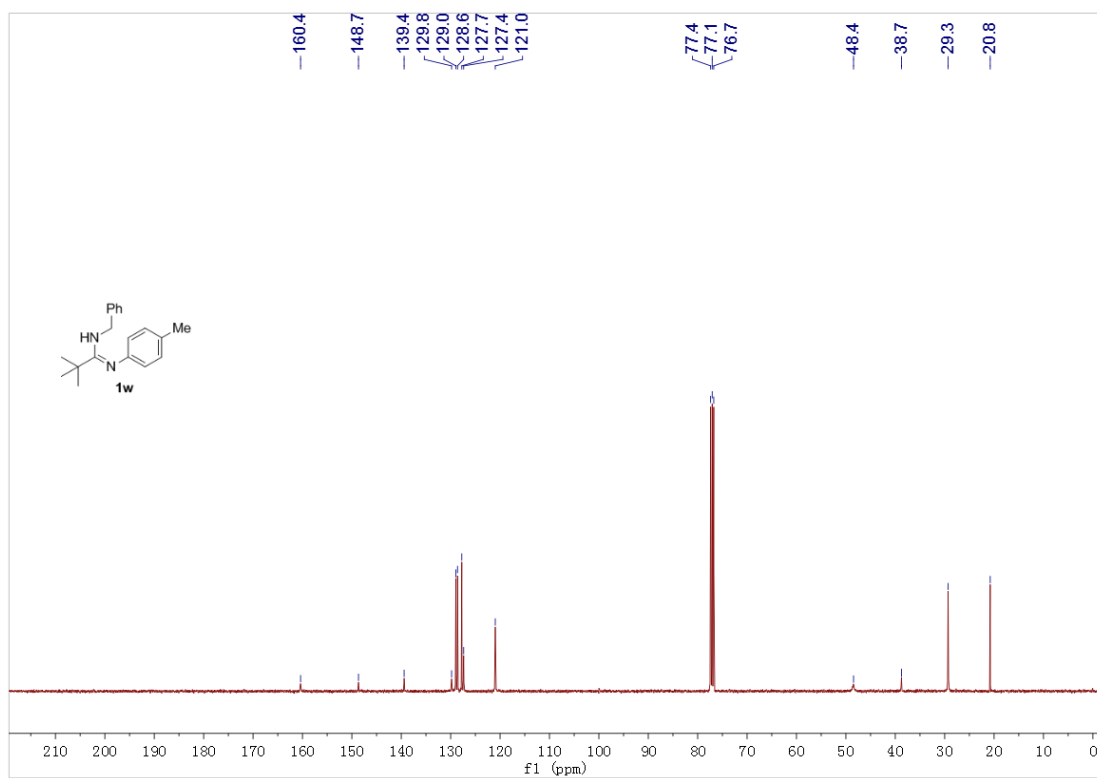

### 3. $^1\text{H}$ NMR and $^{13}\text{C}$ NMR Spectra of Products 2

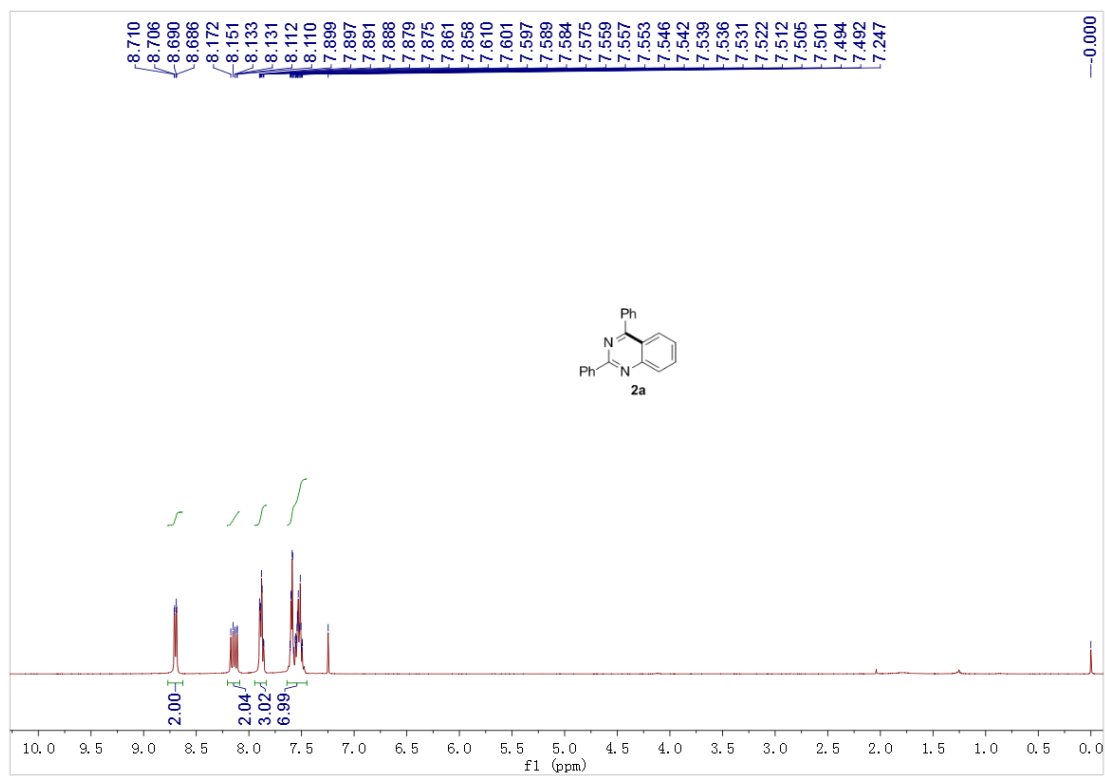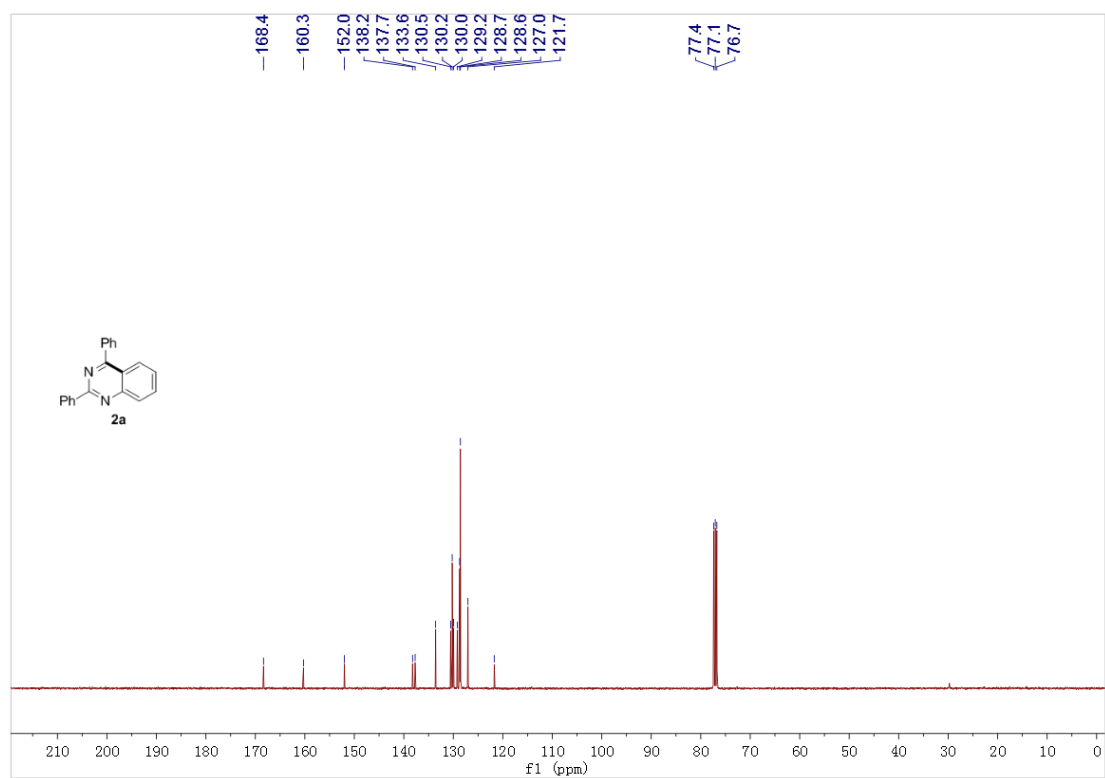

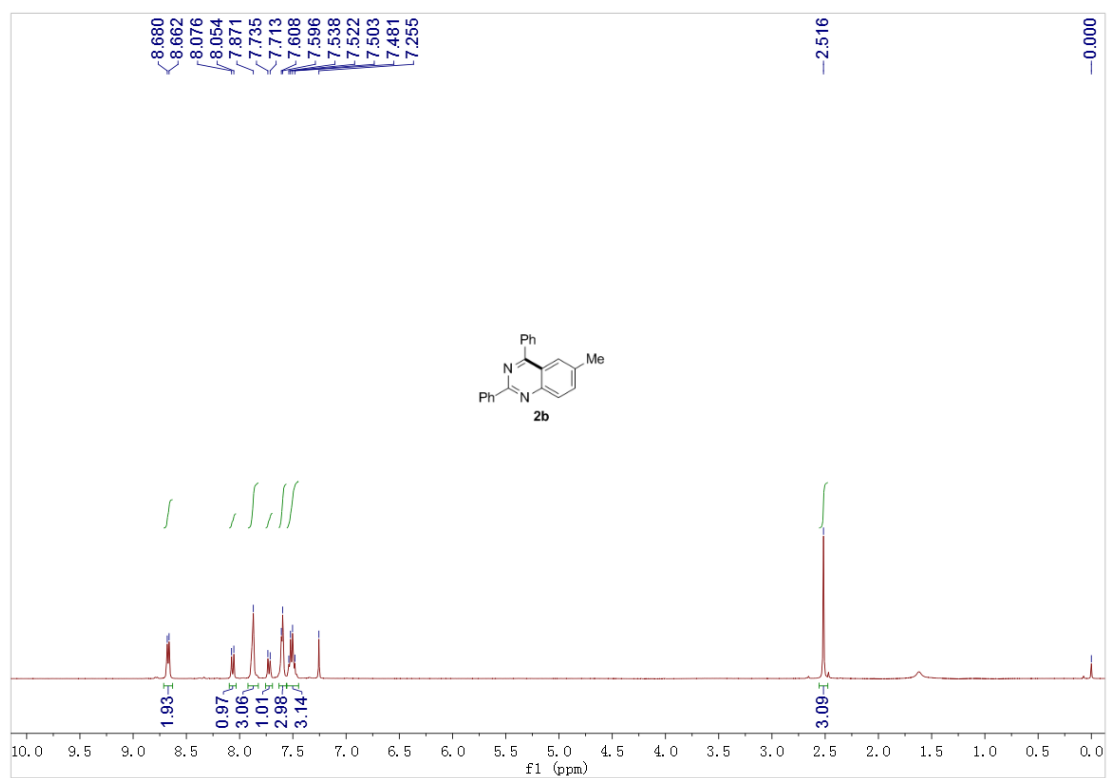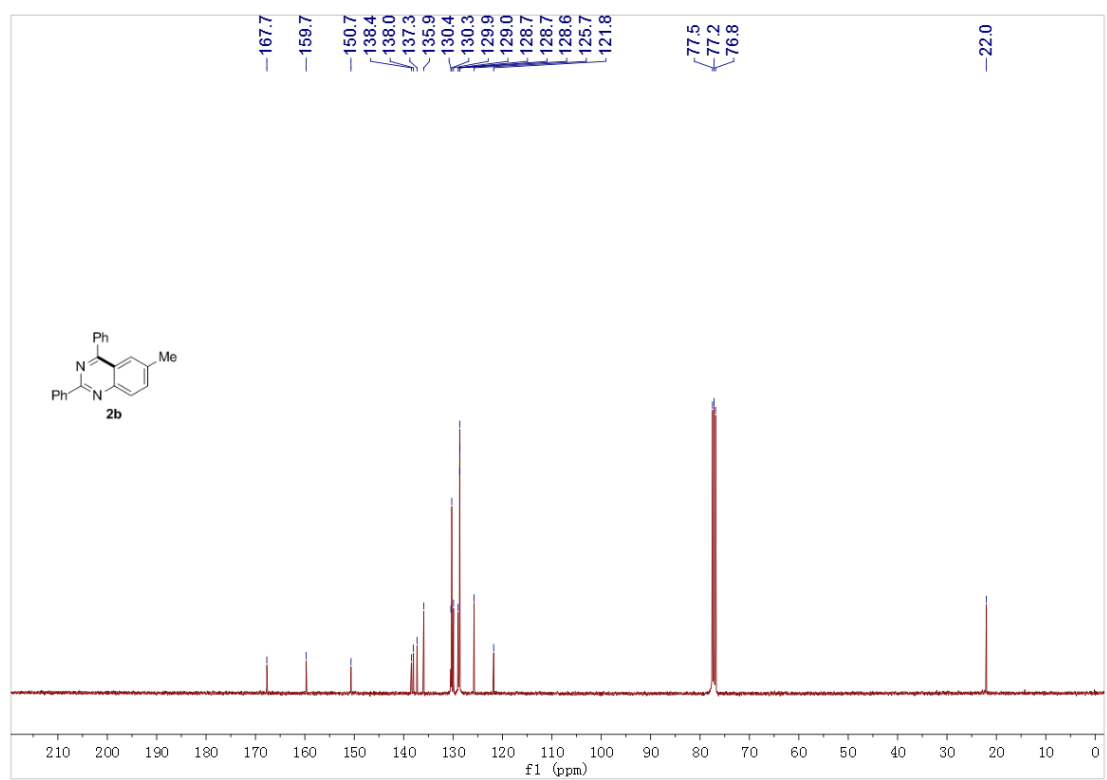

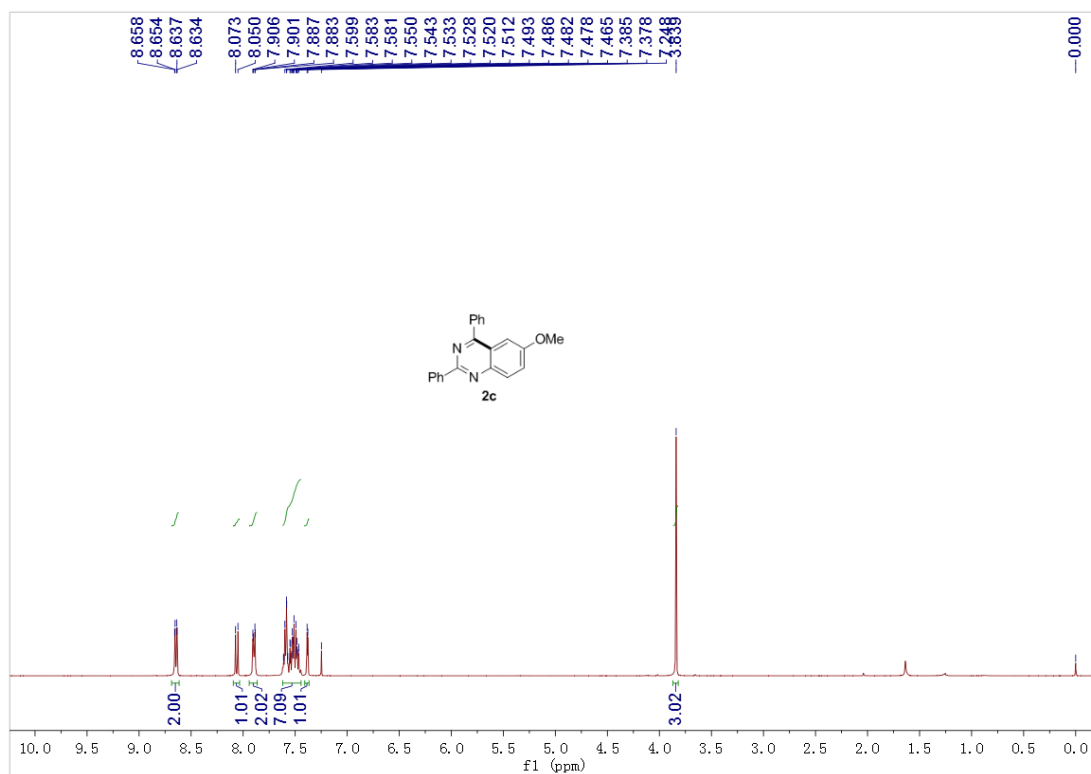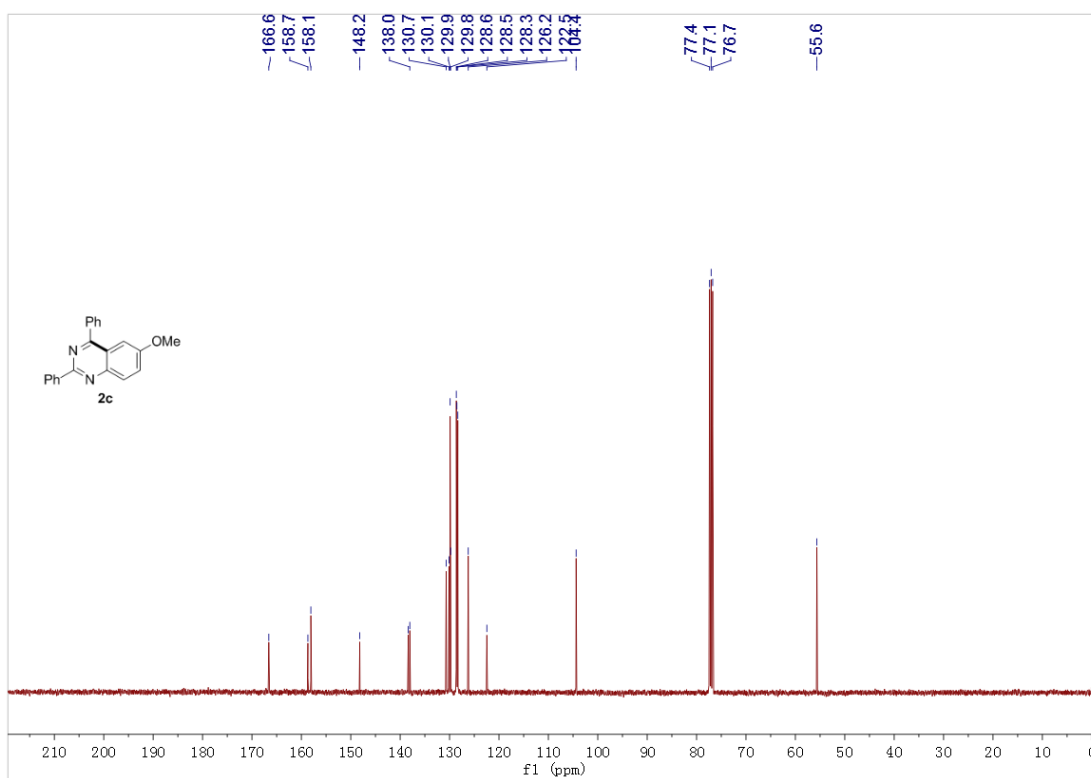

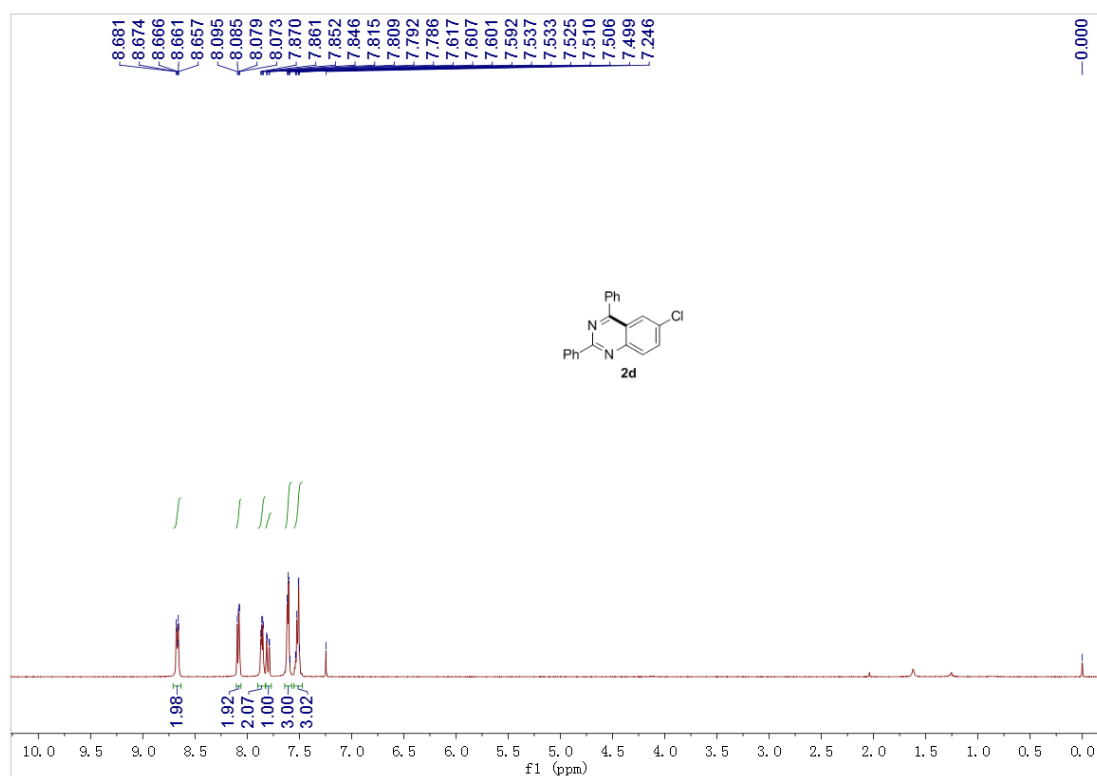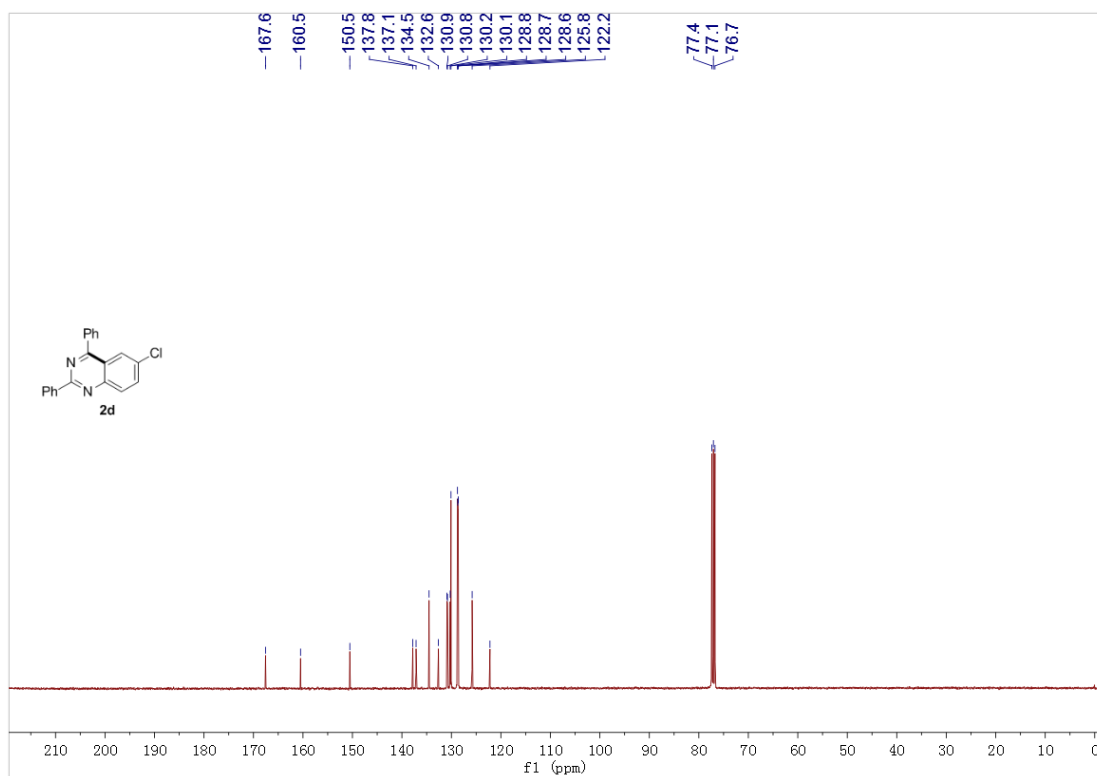

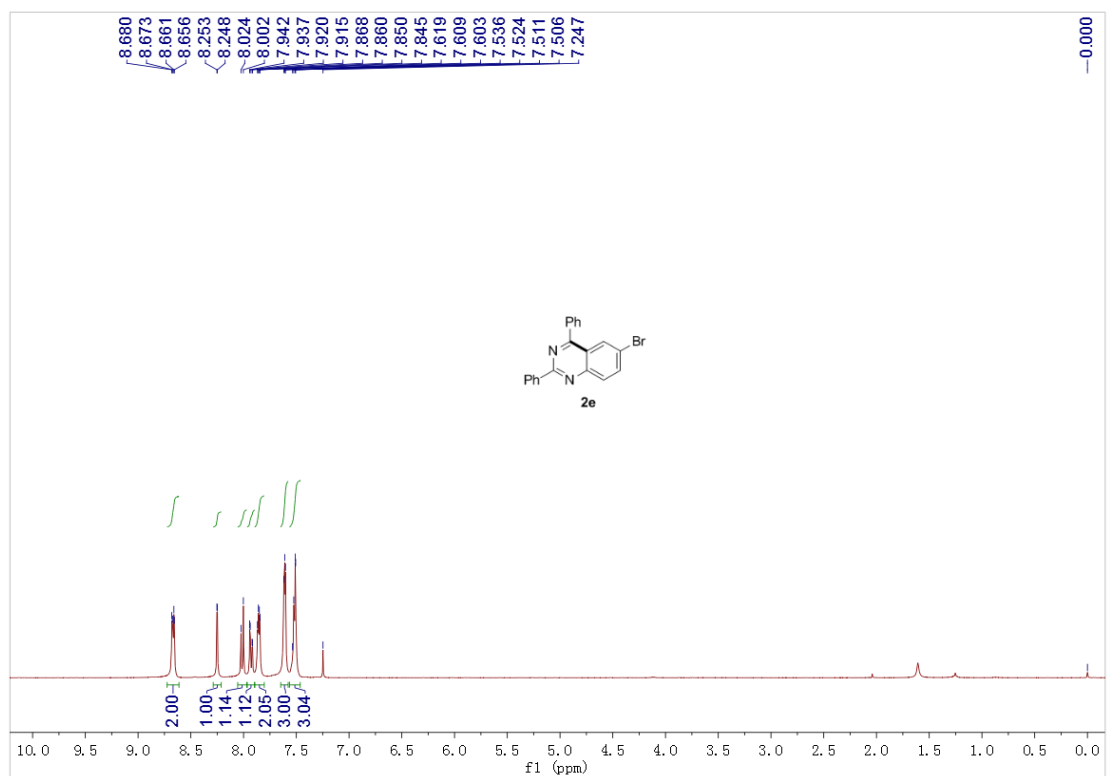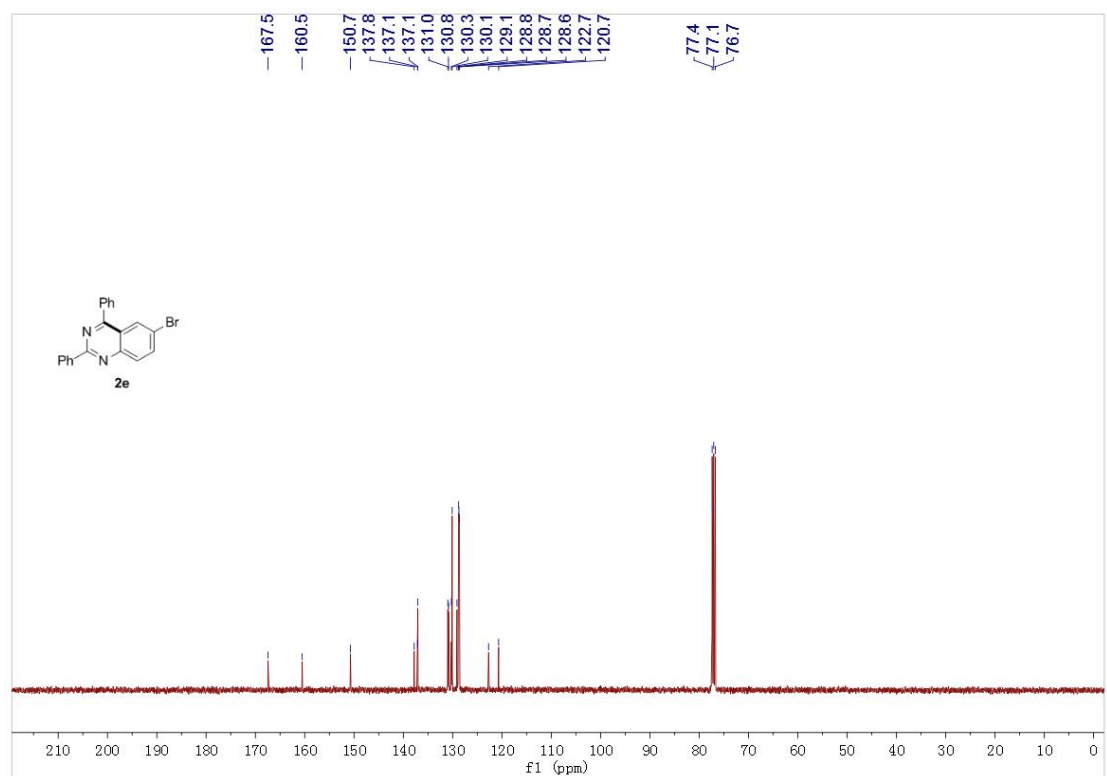

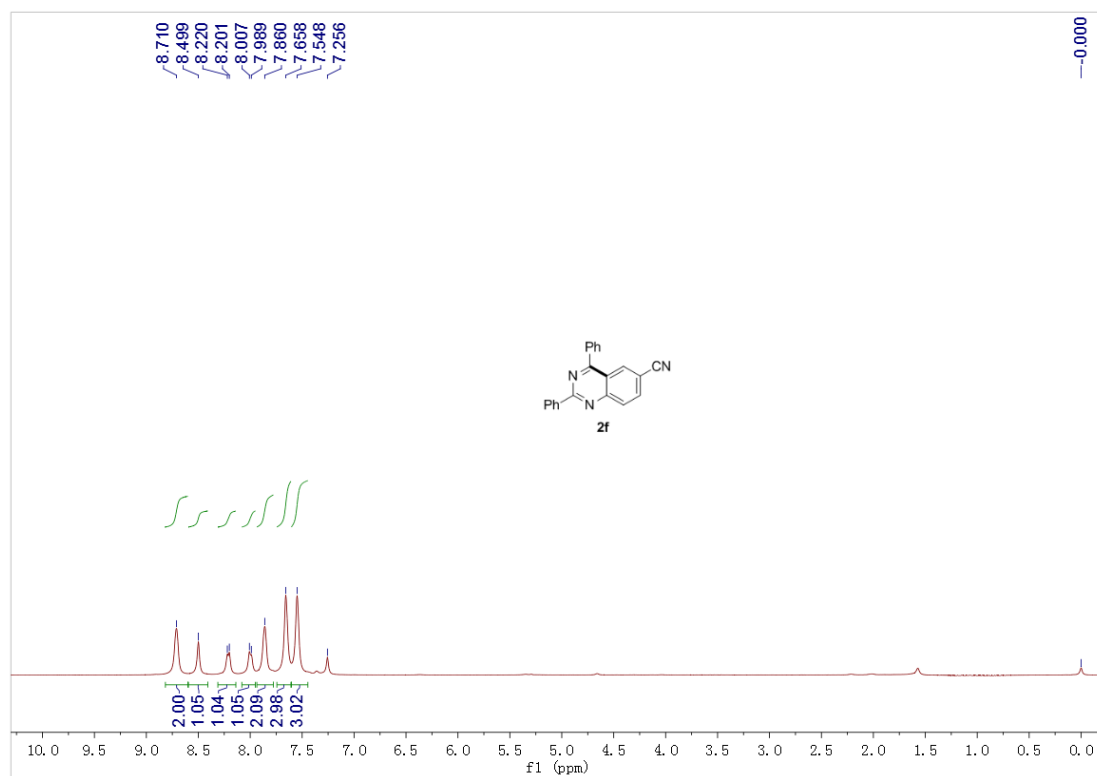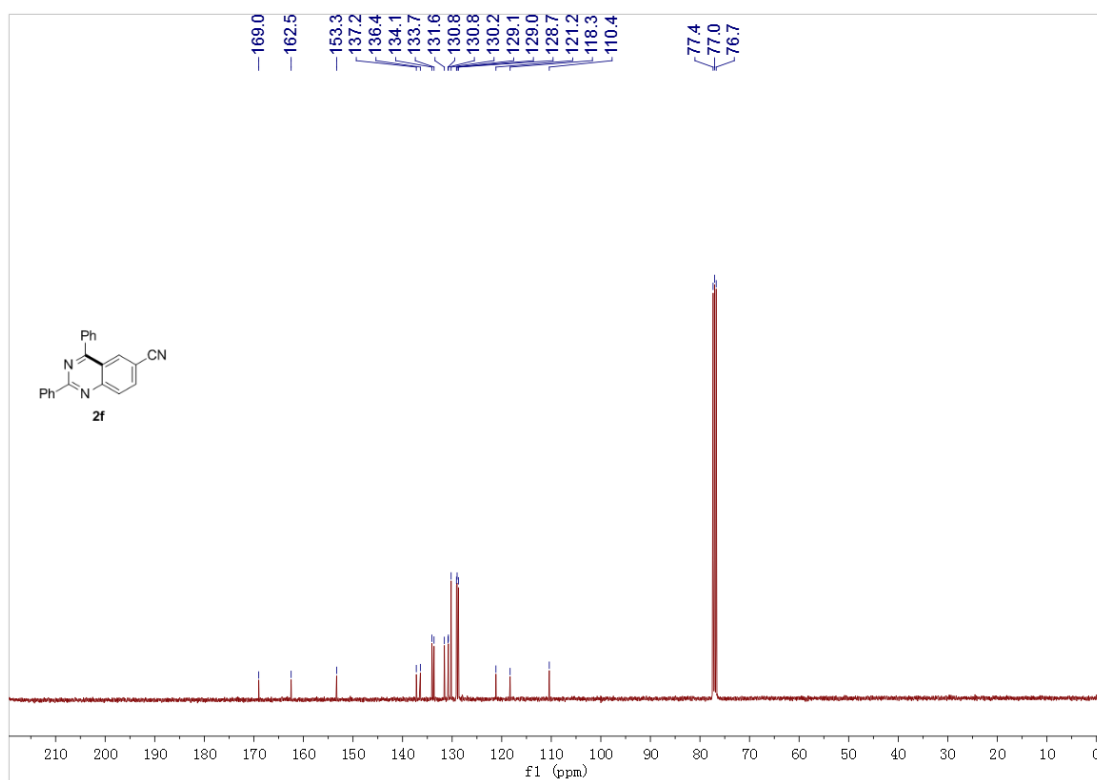

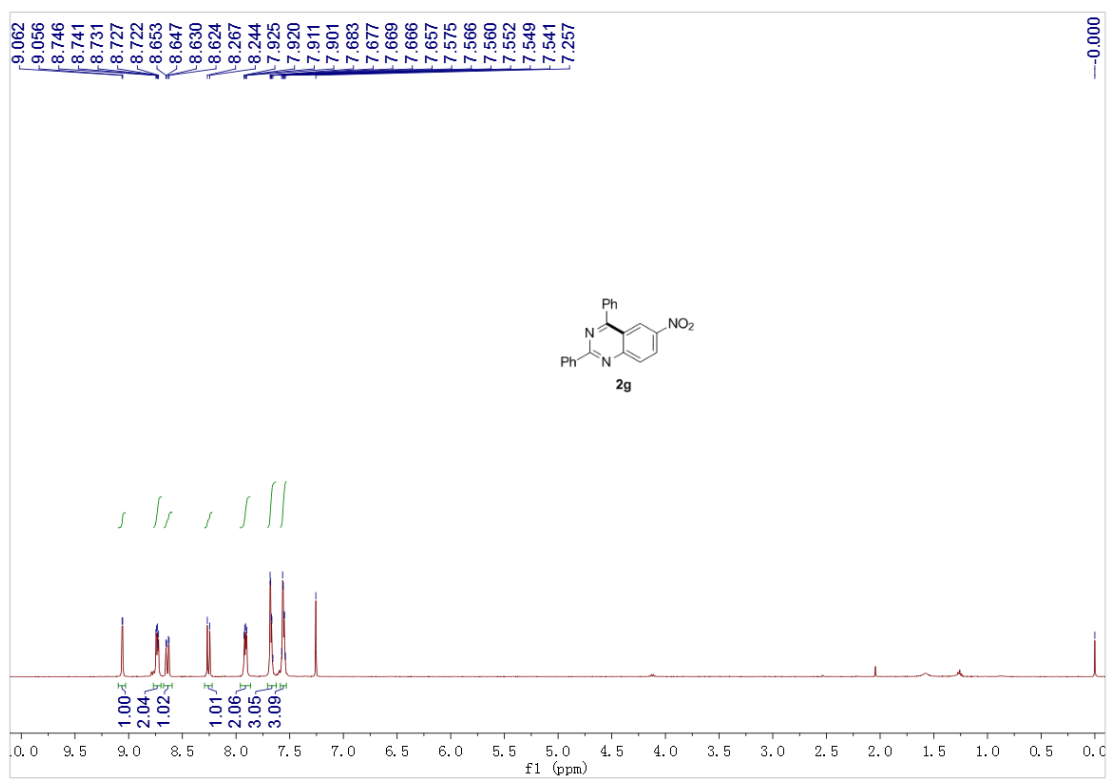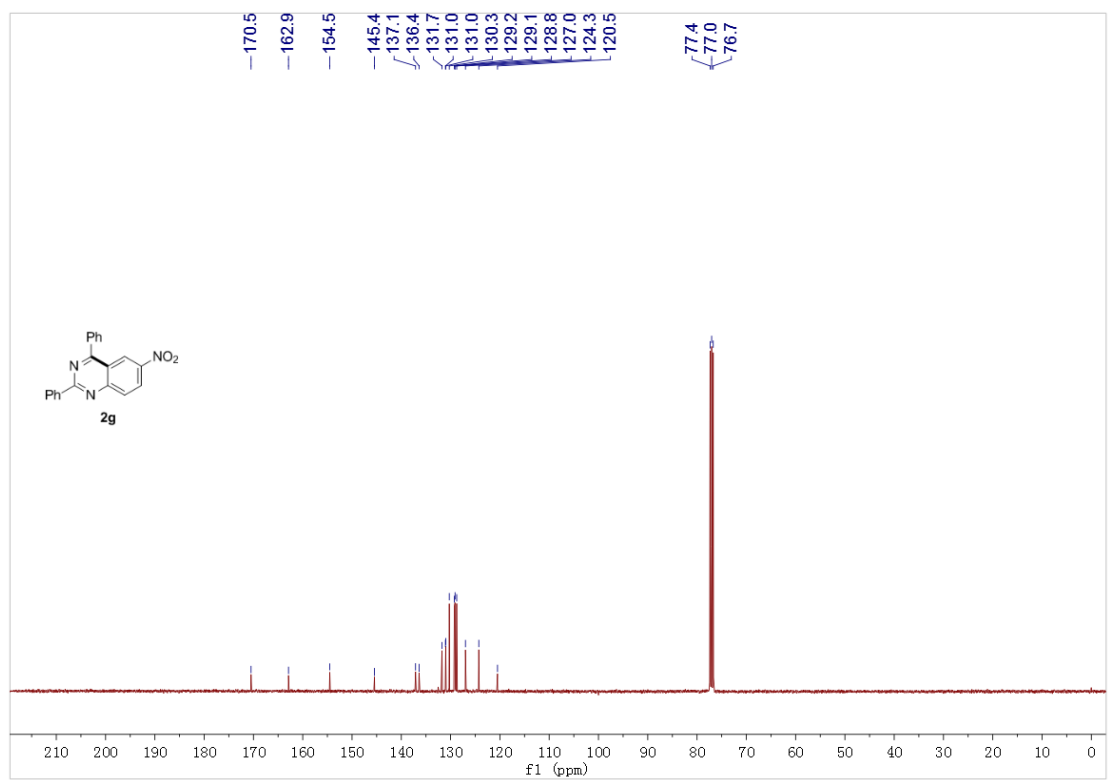



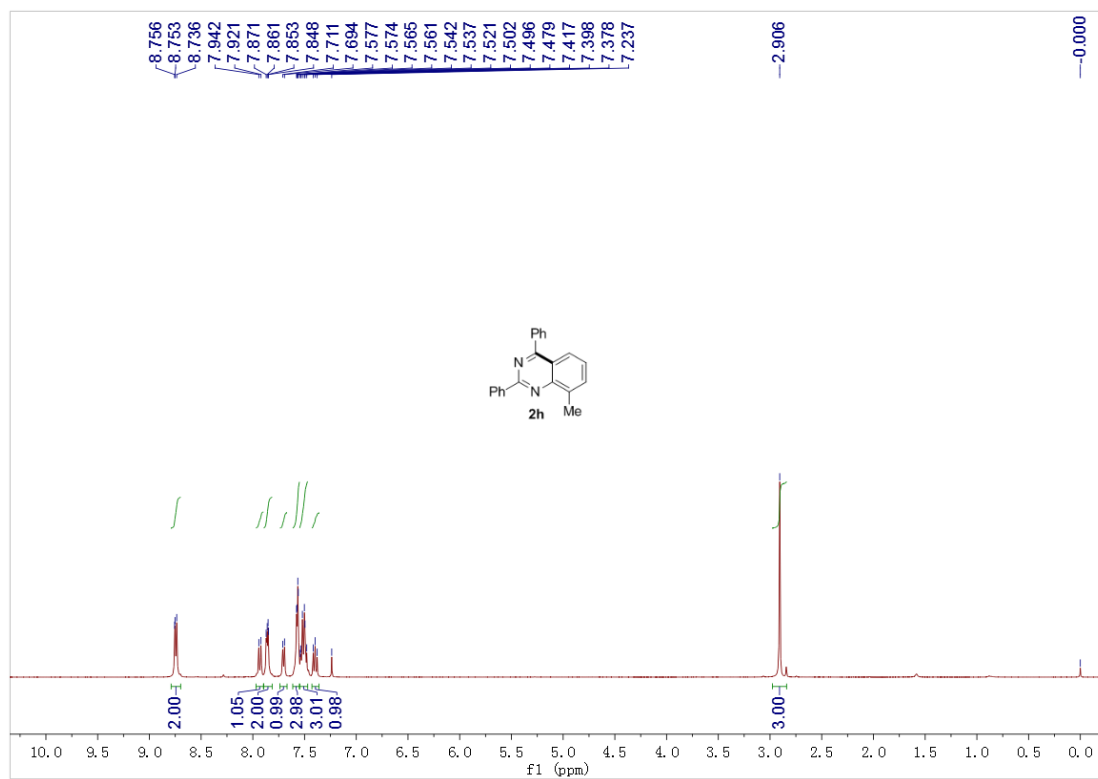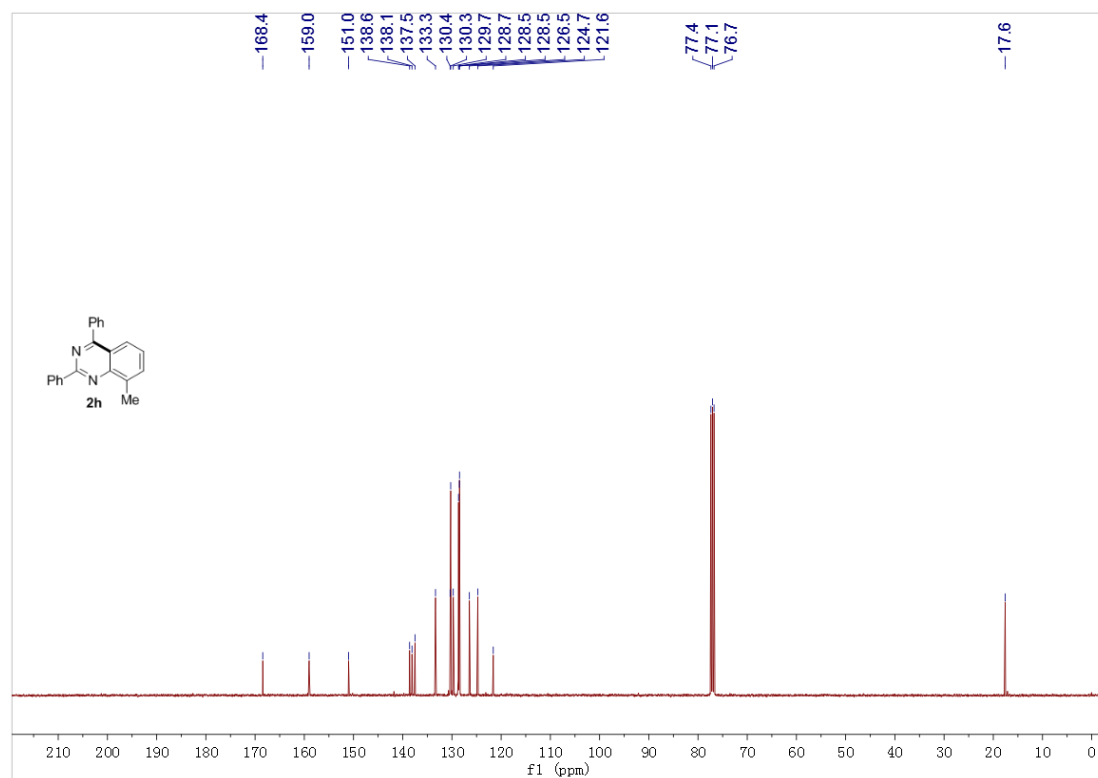

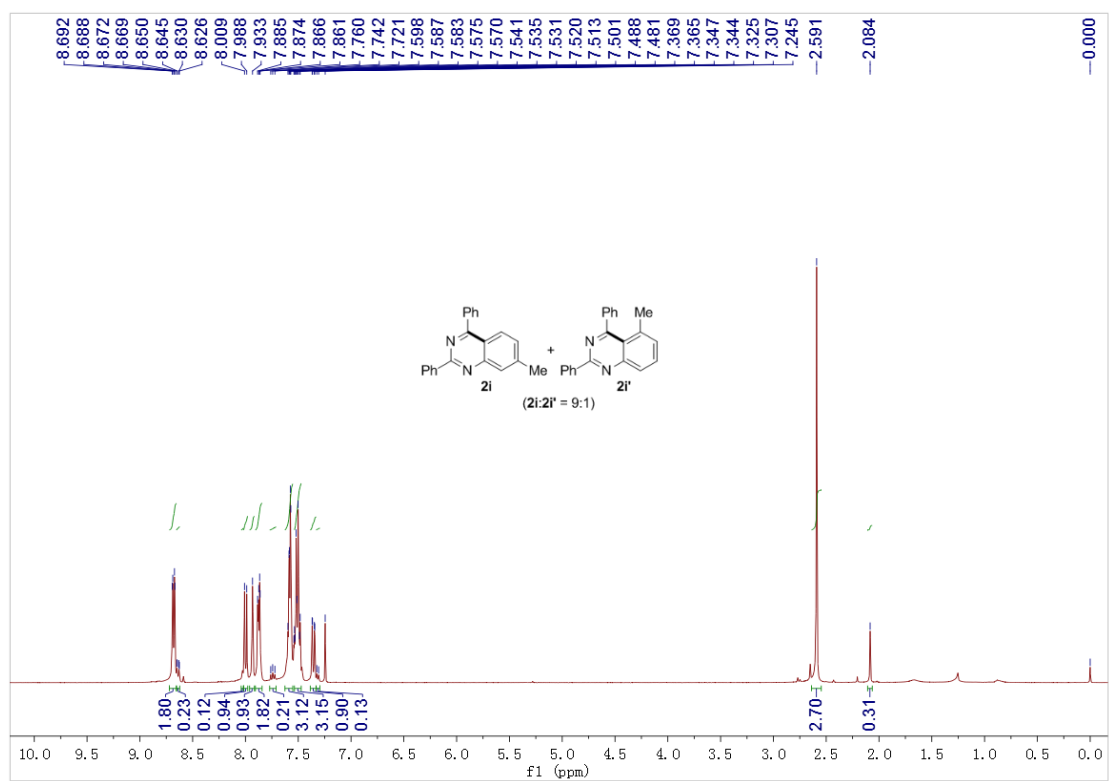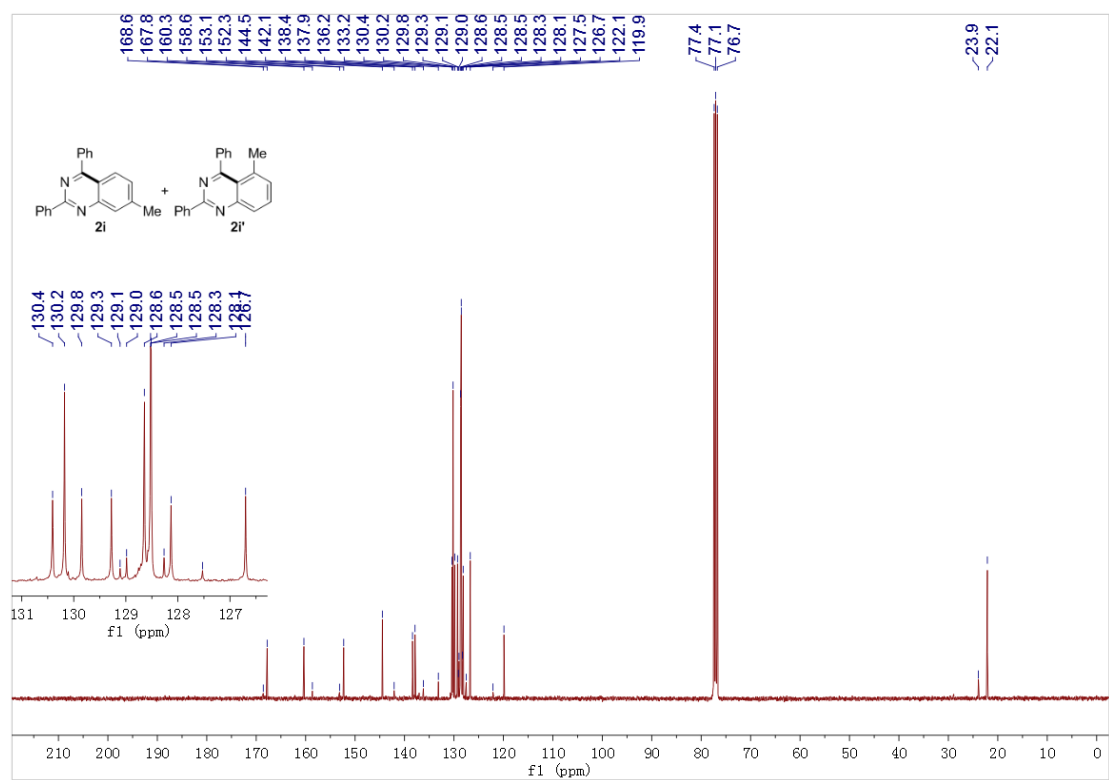

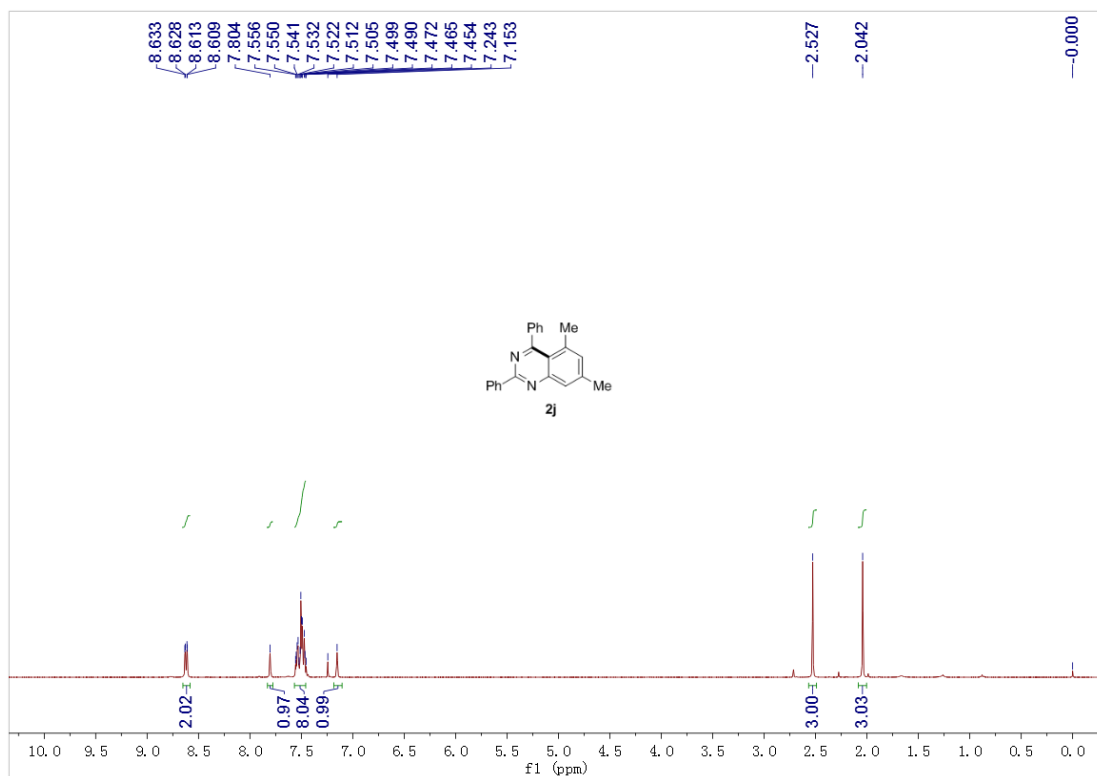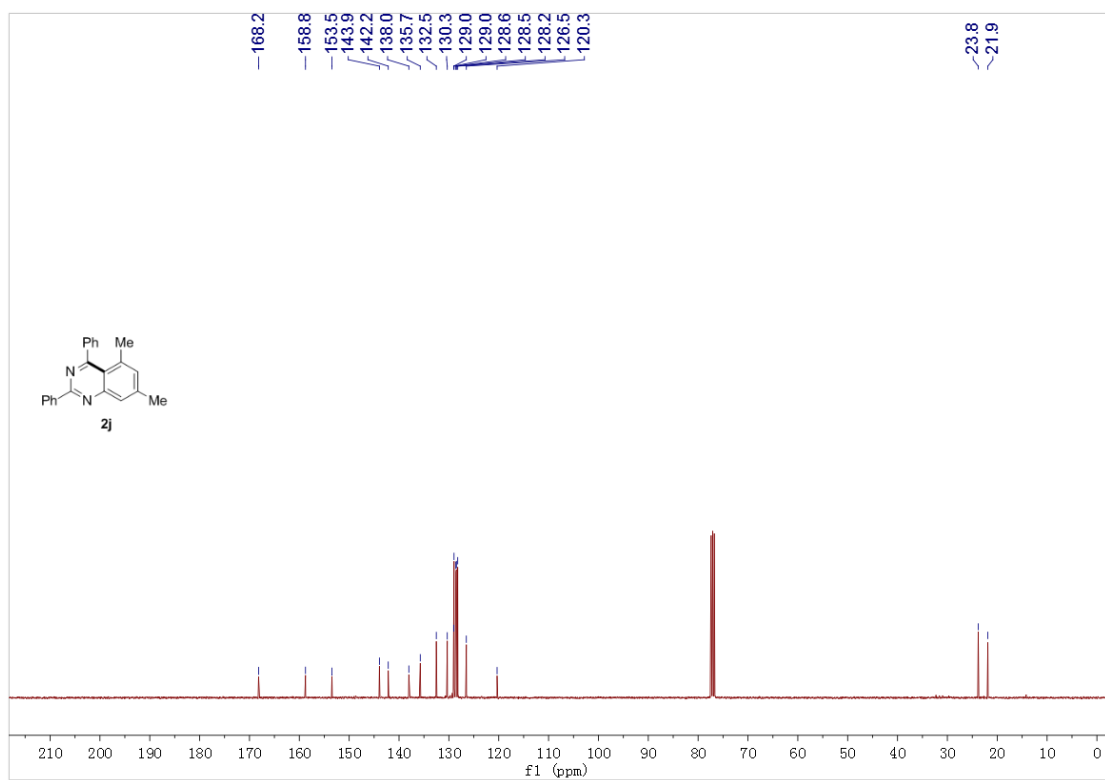

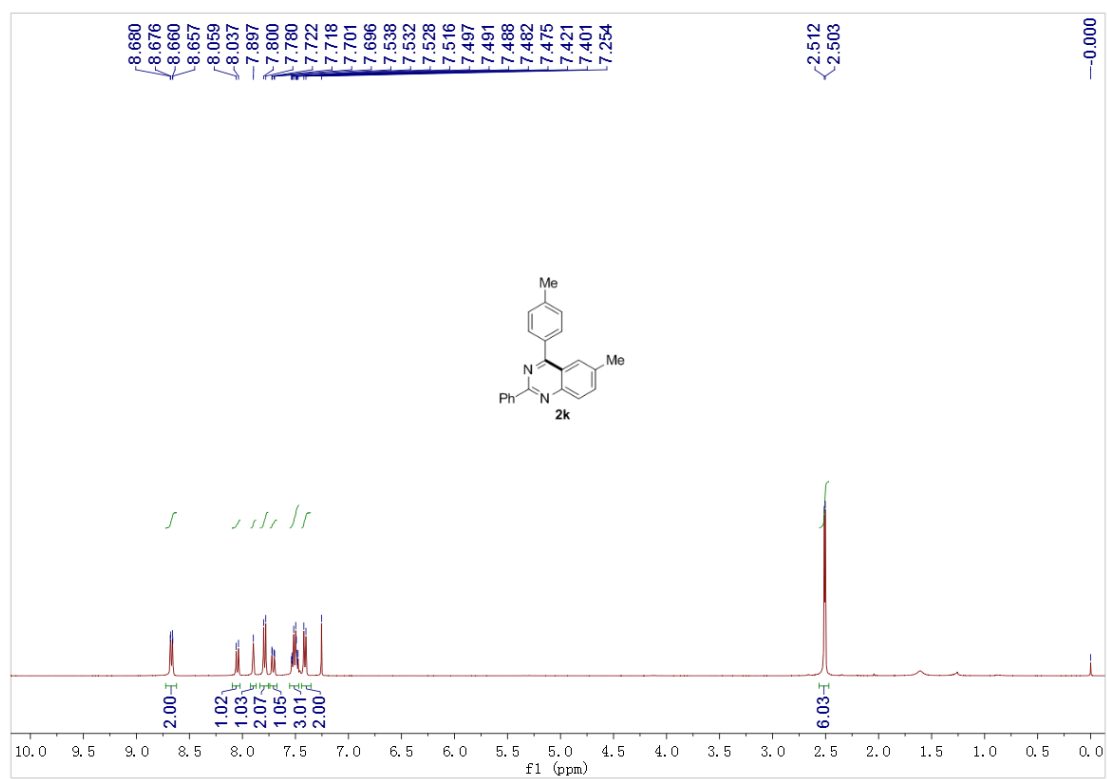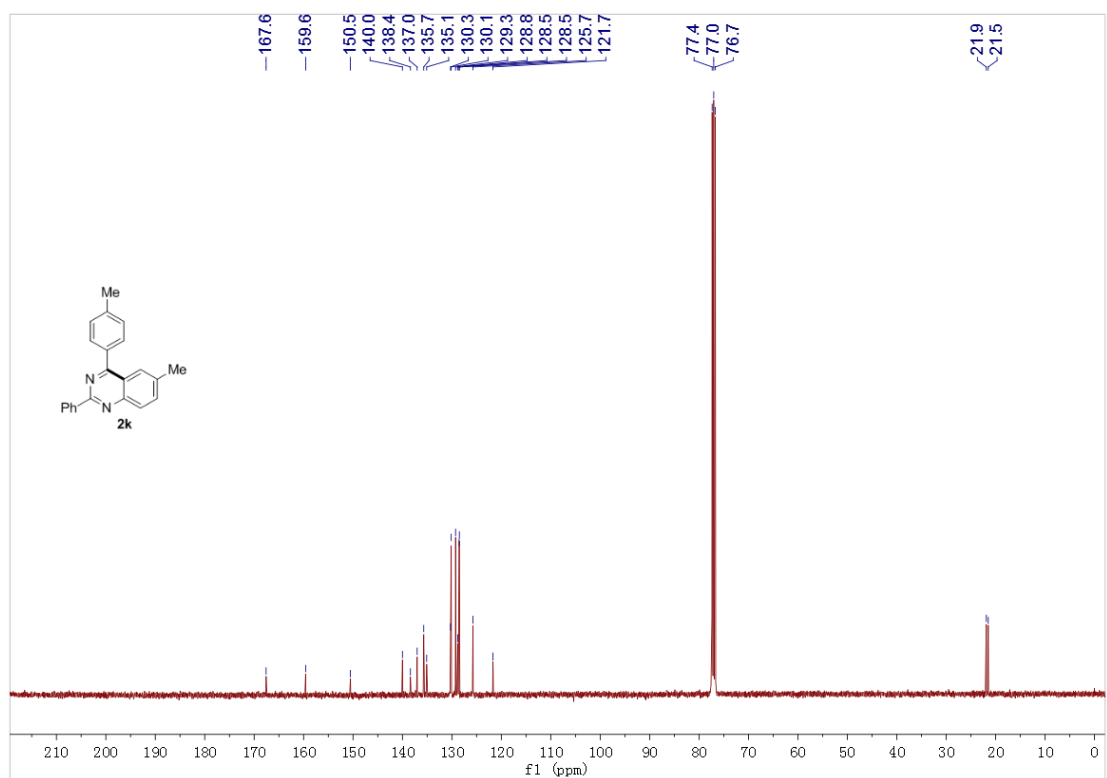

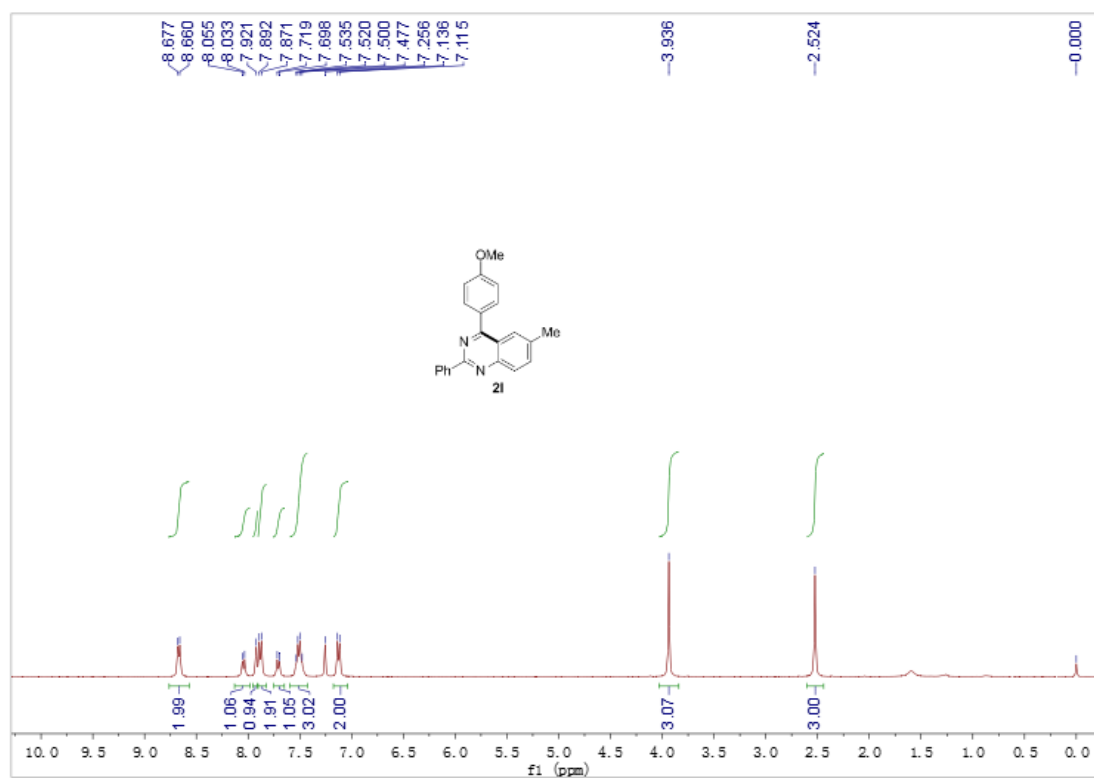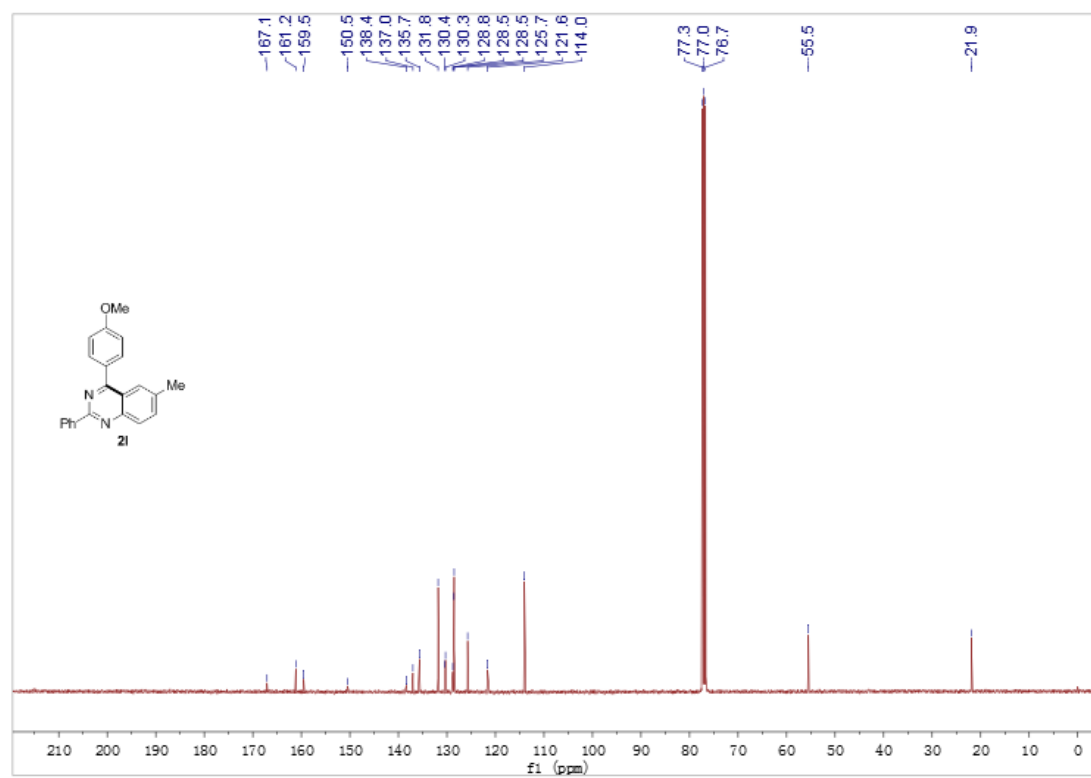

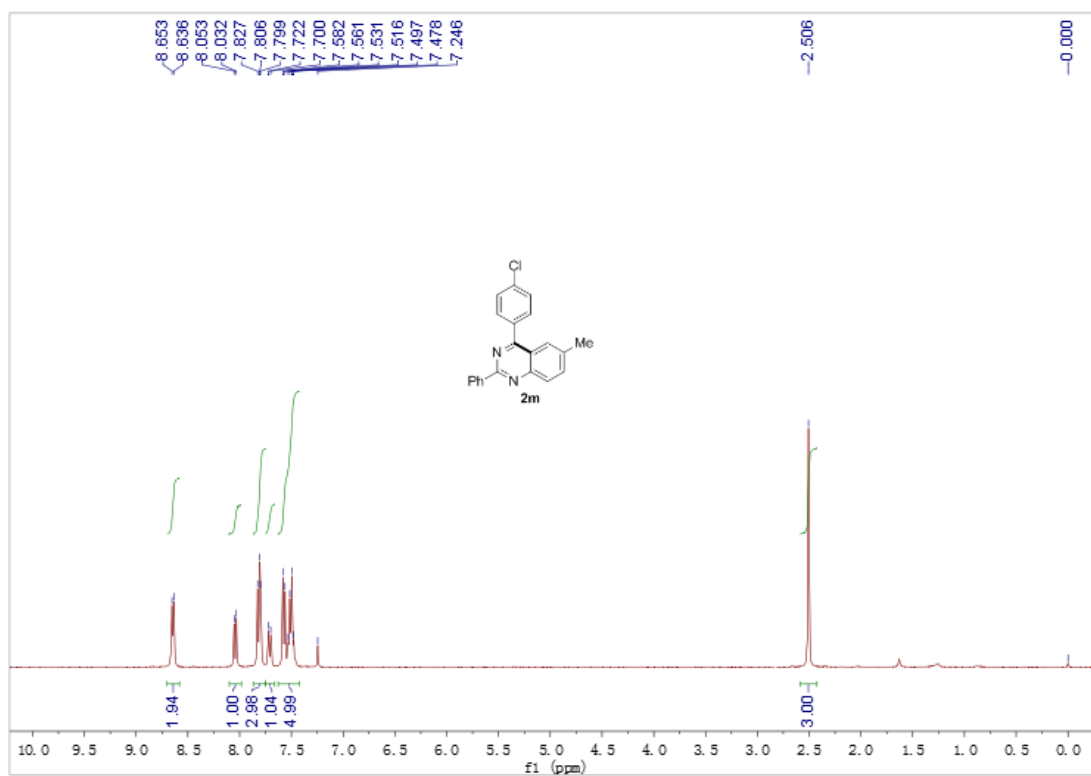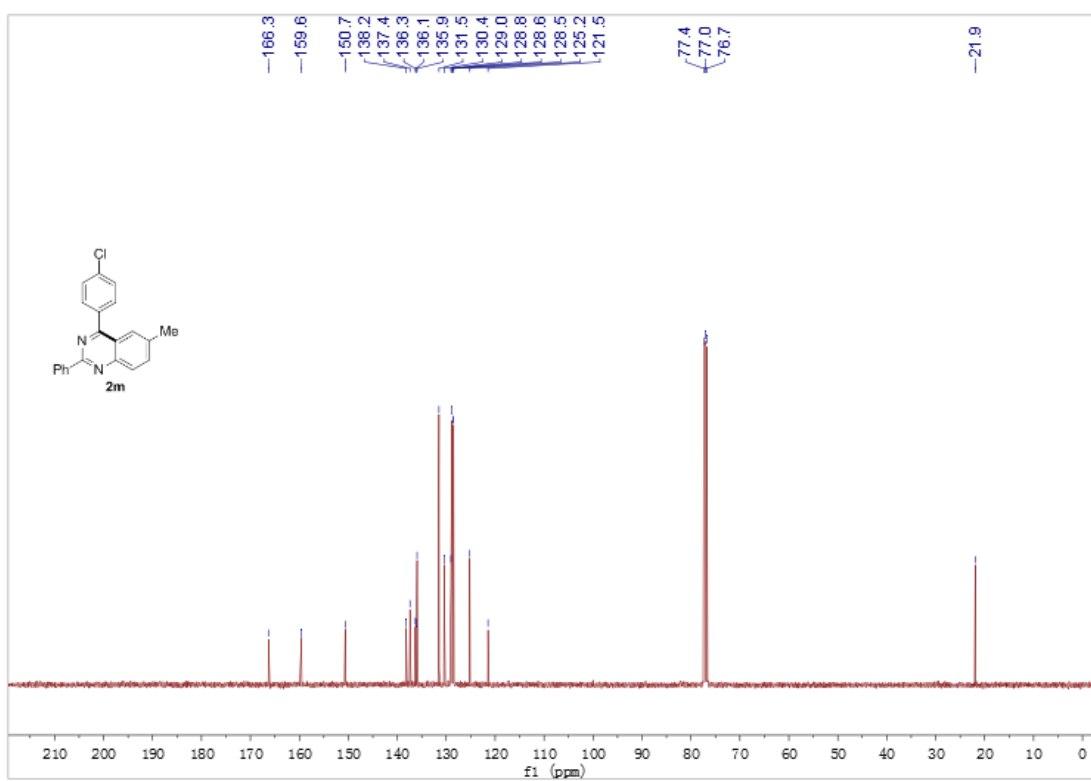

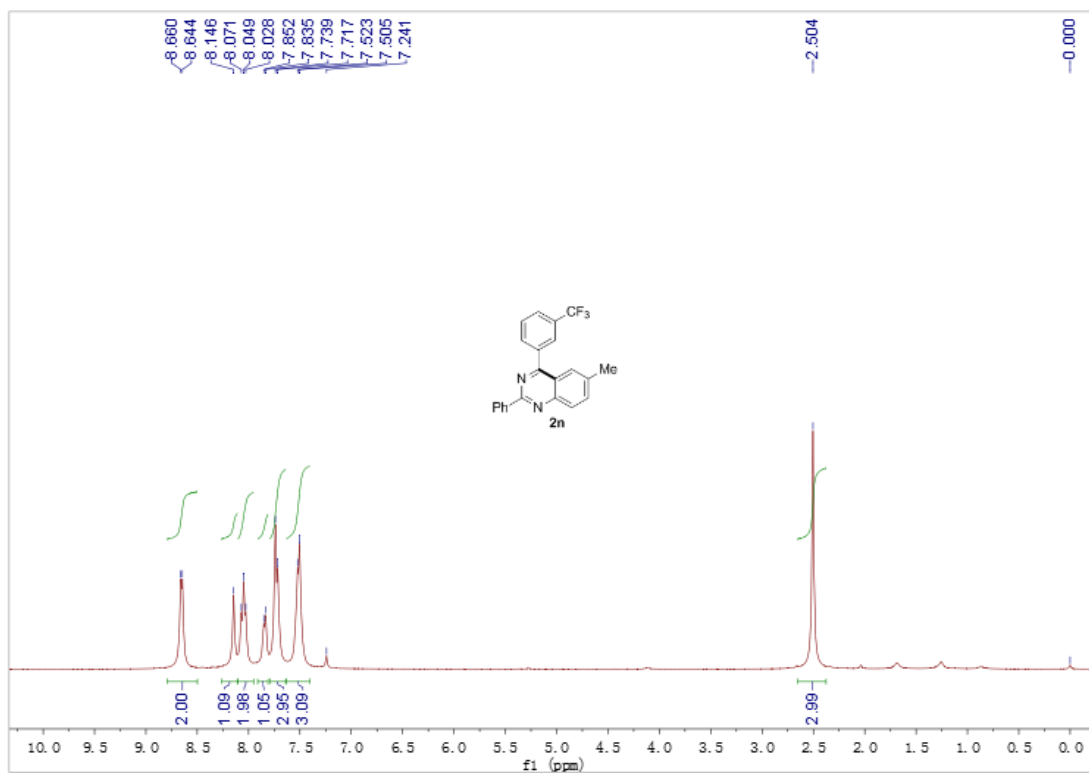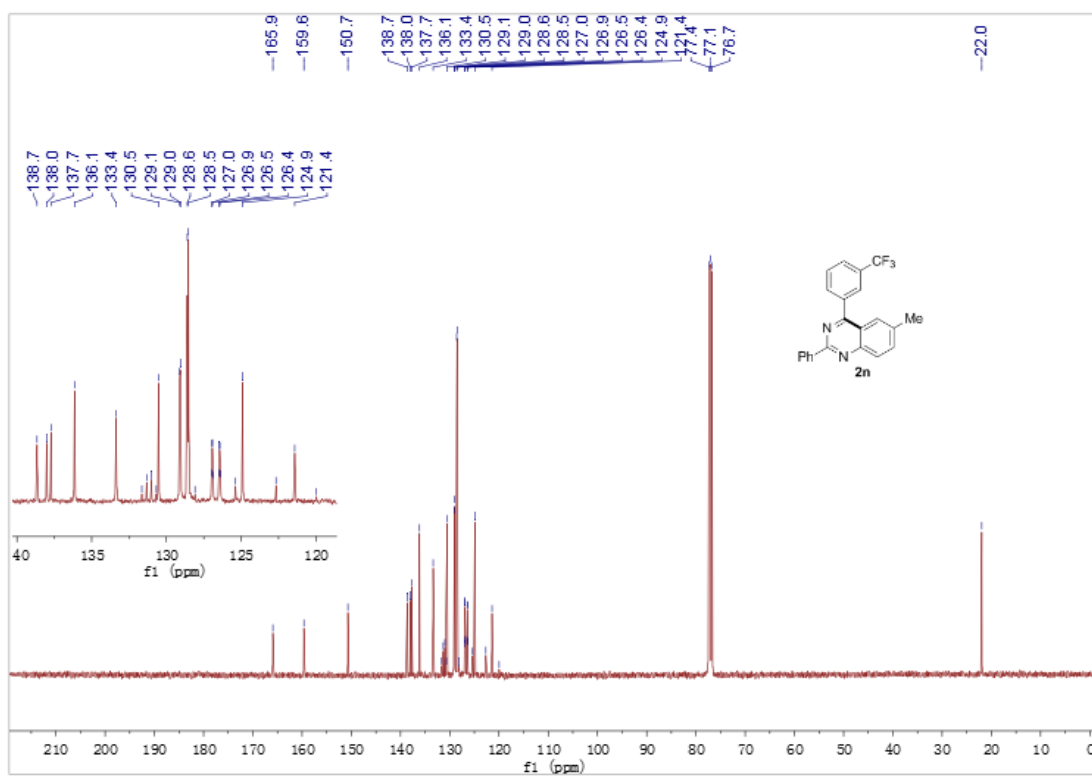

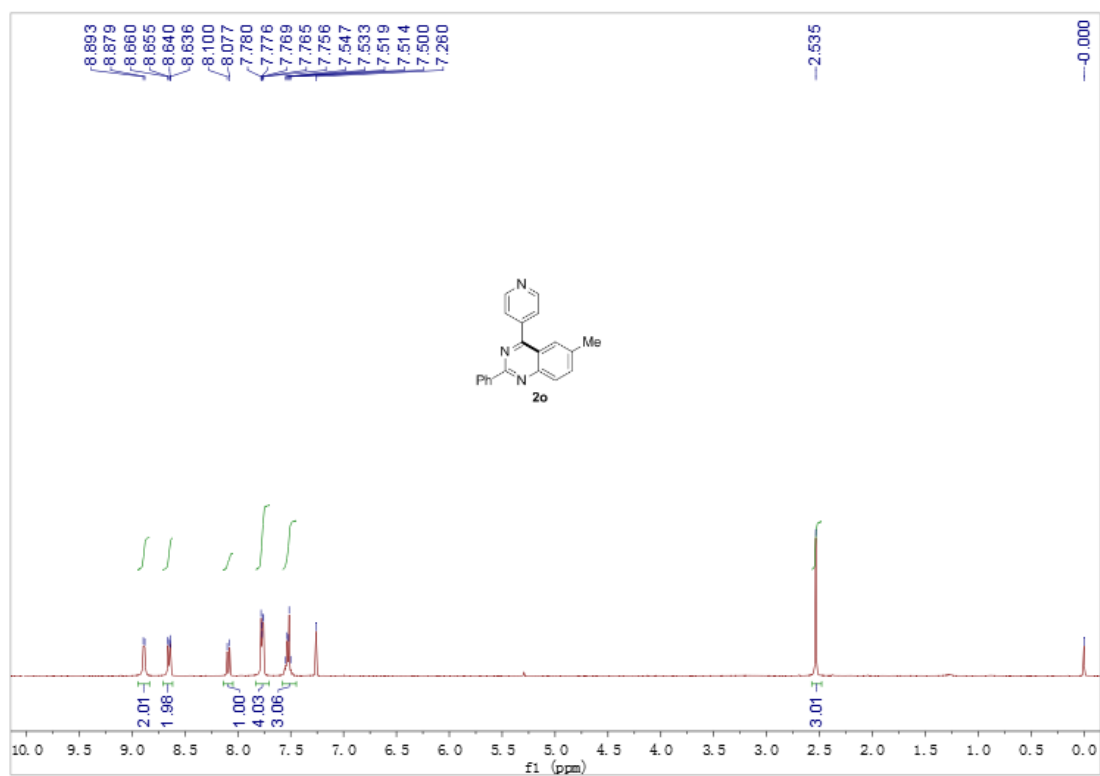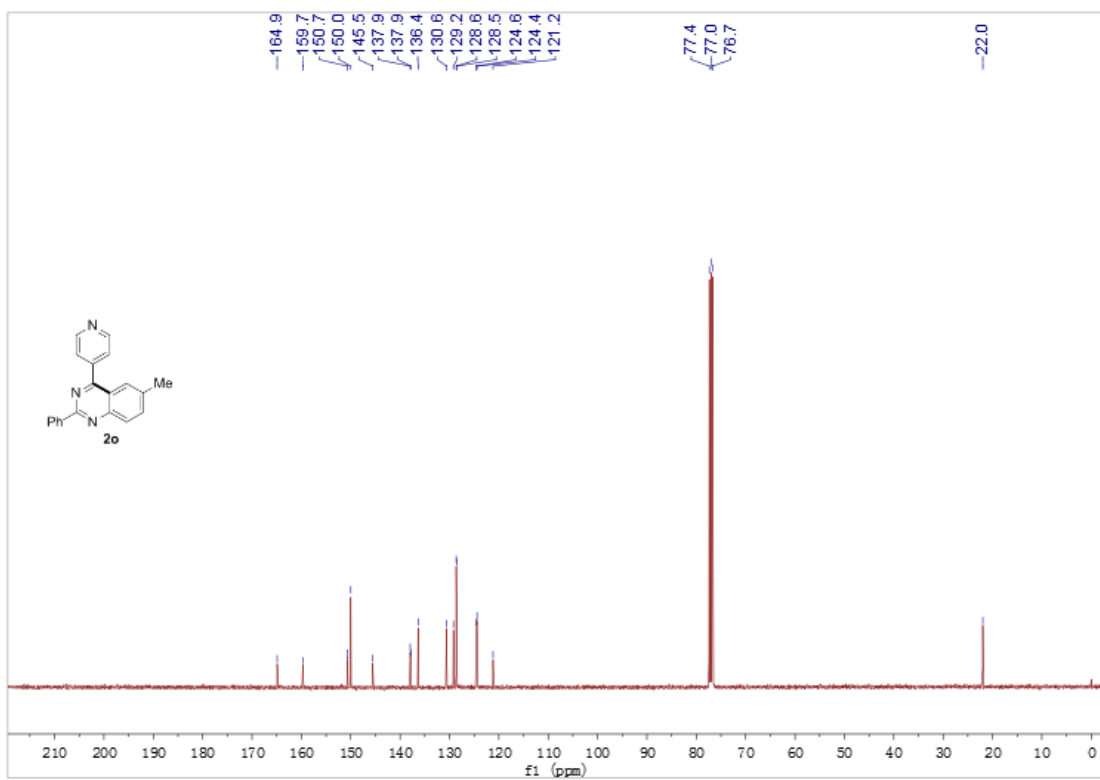



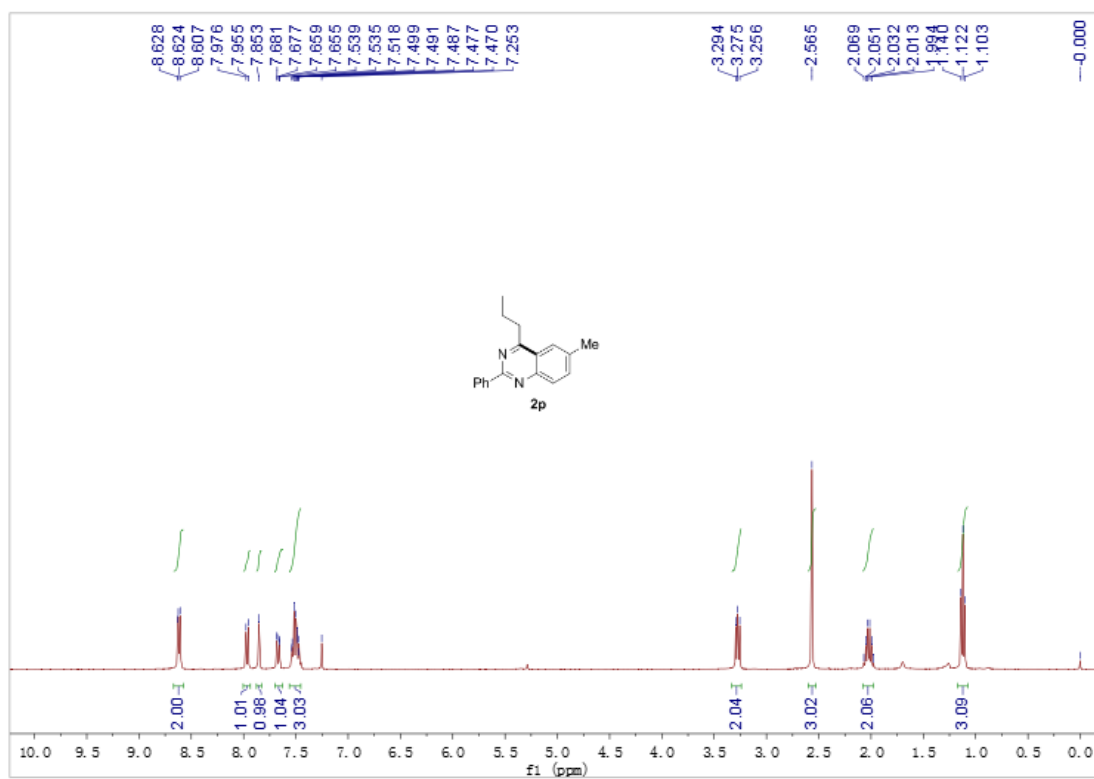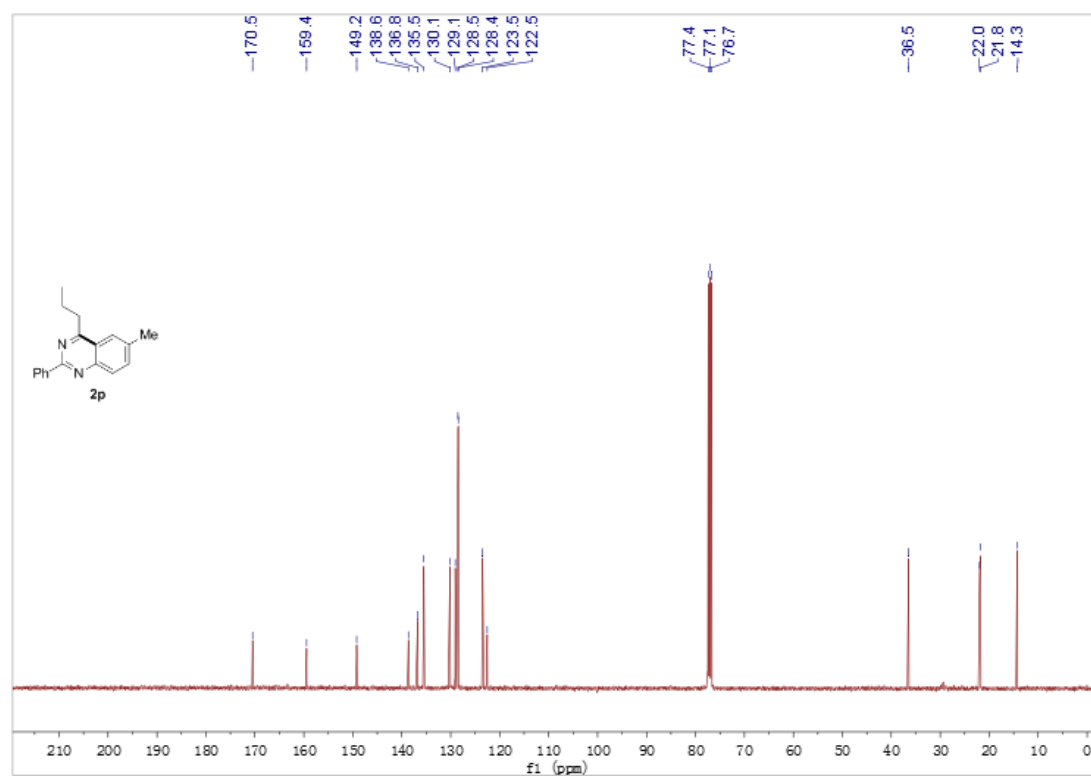

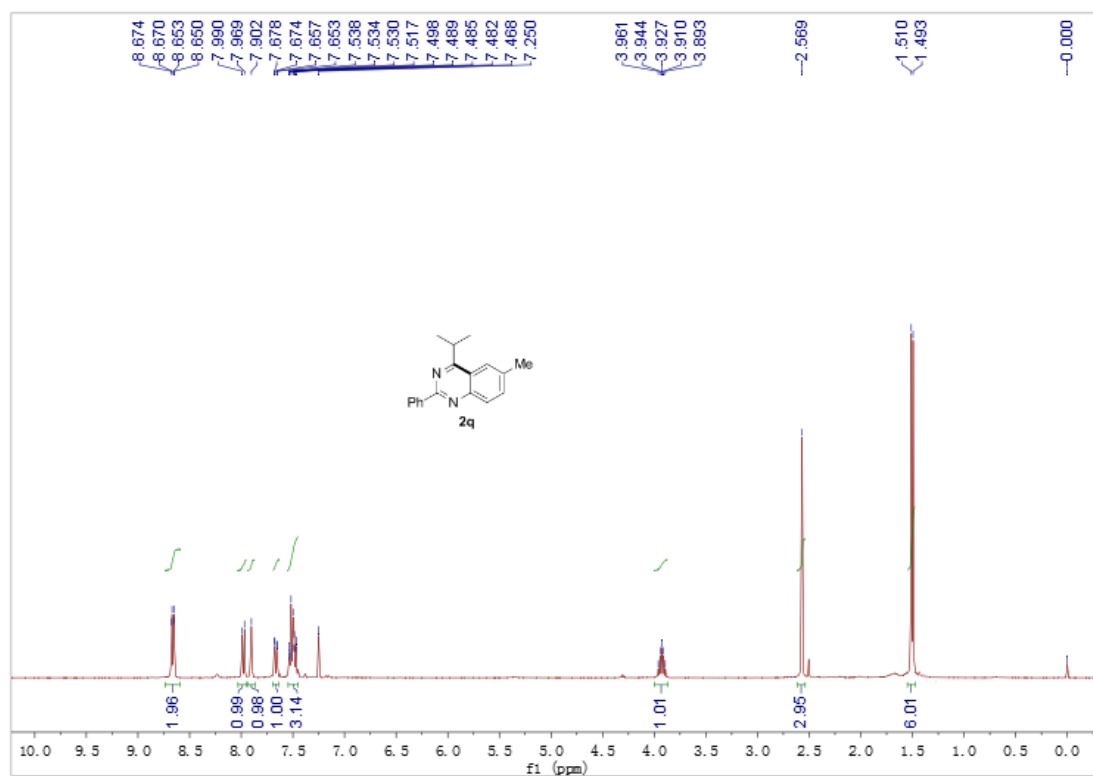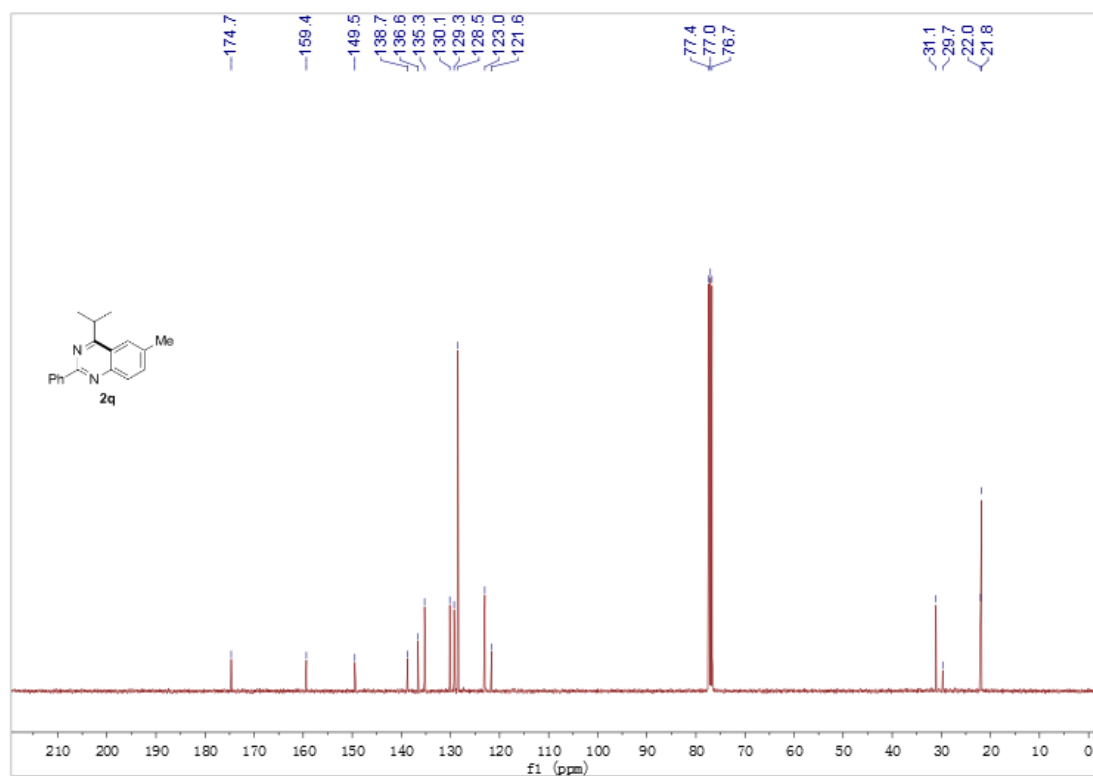

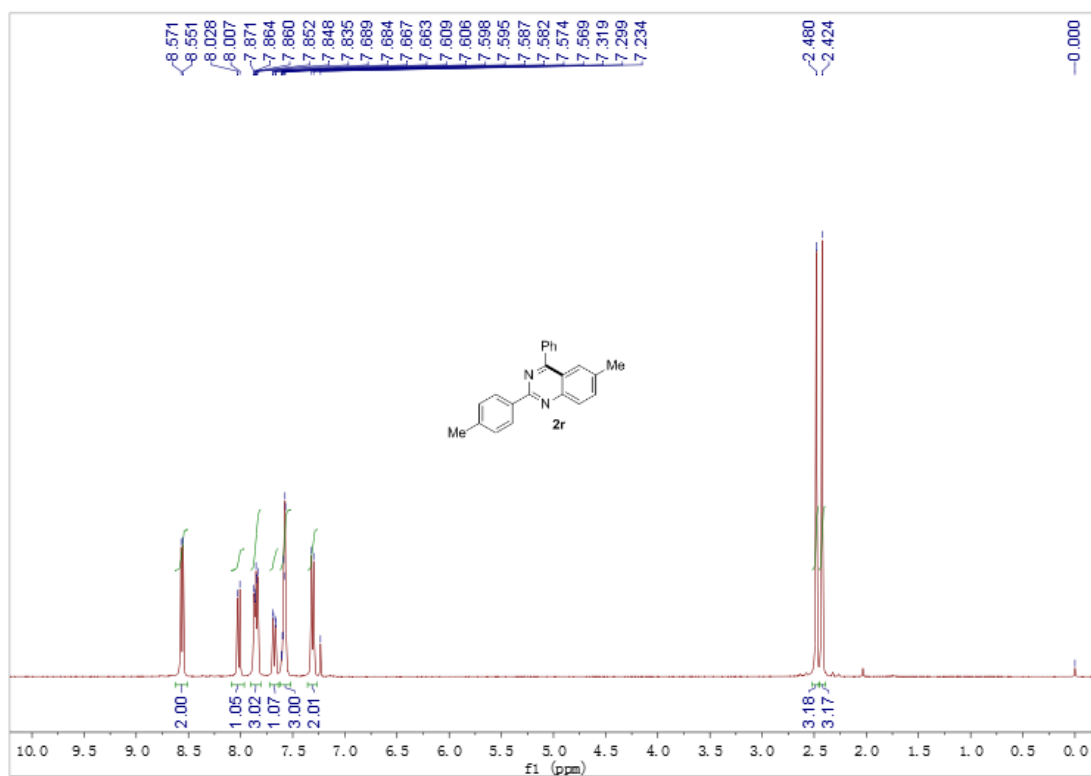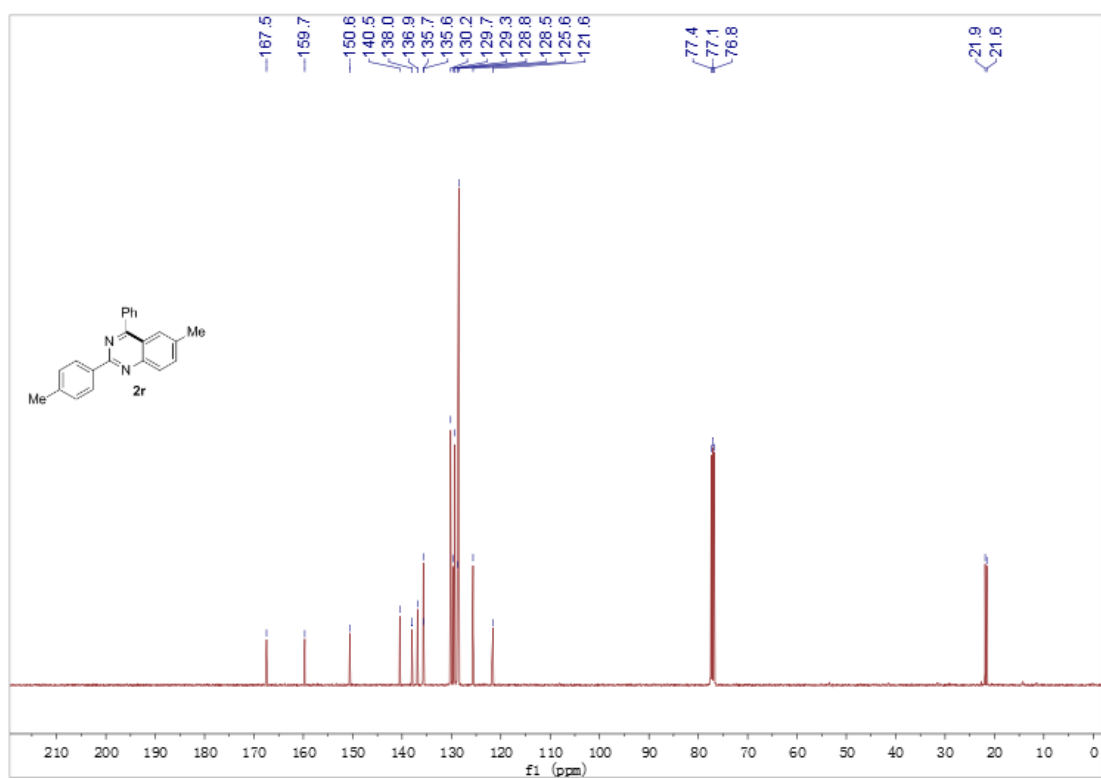

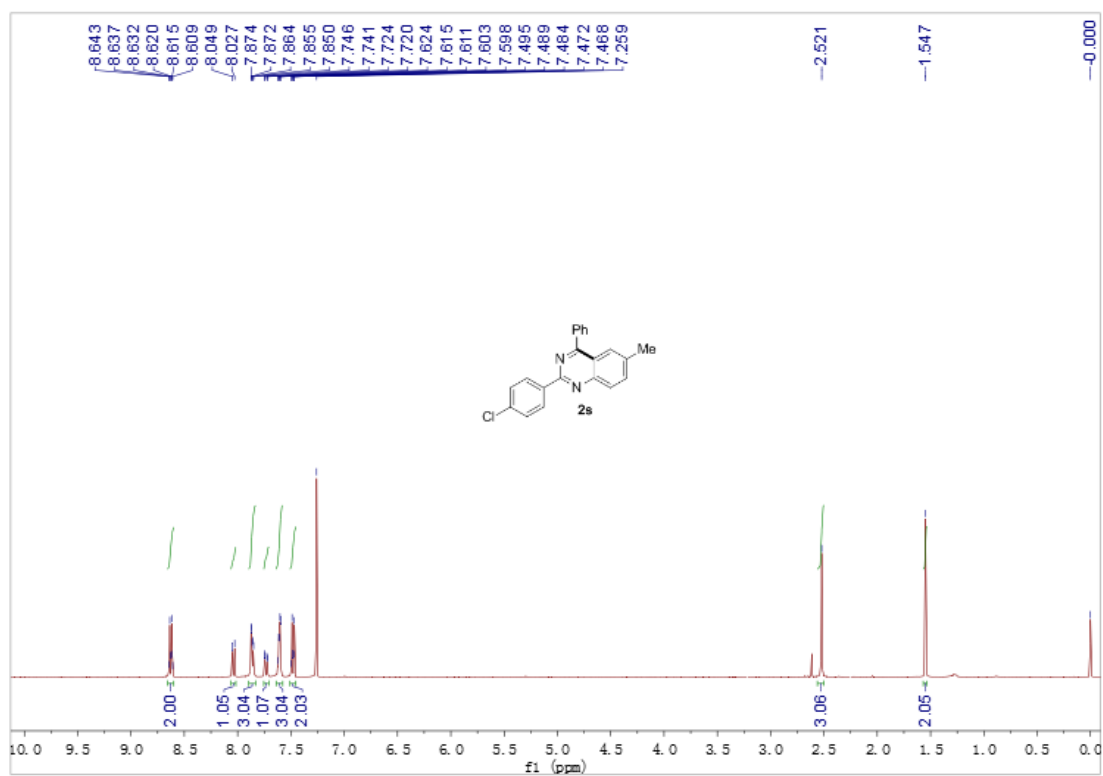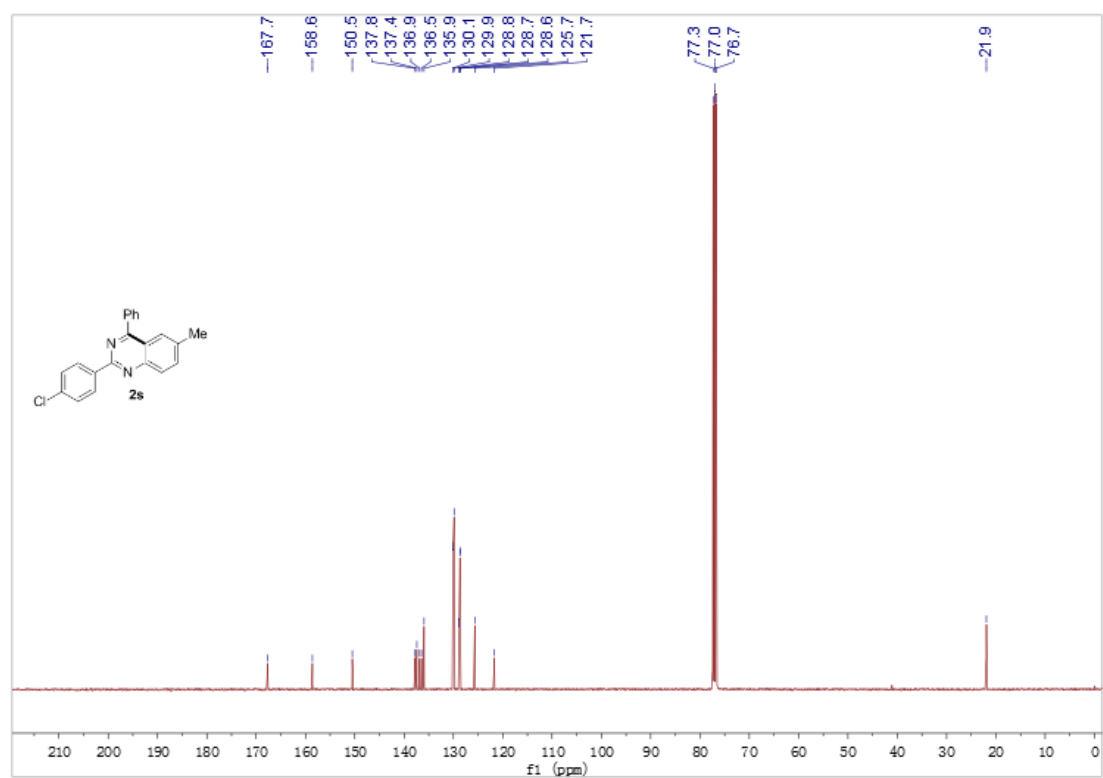

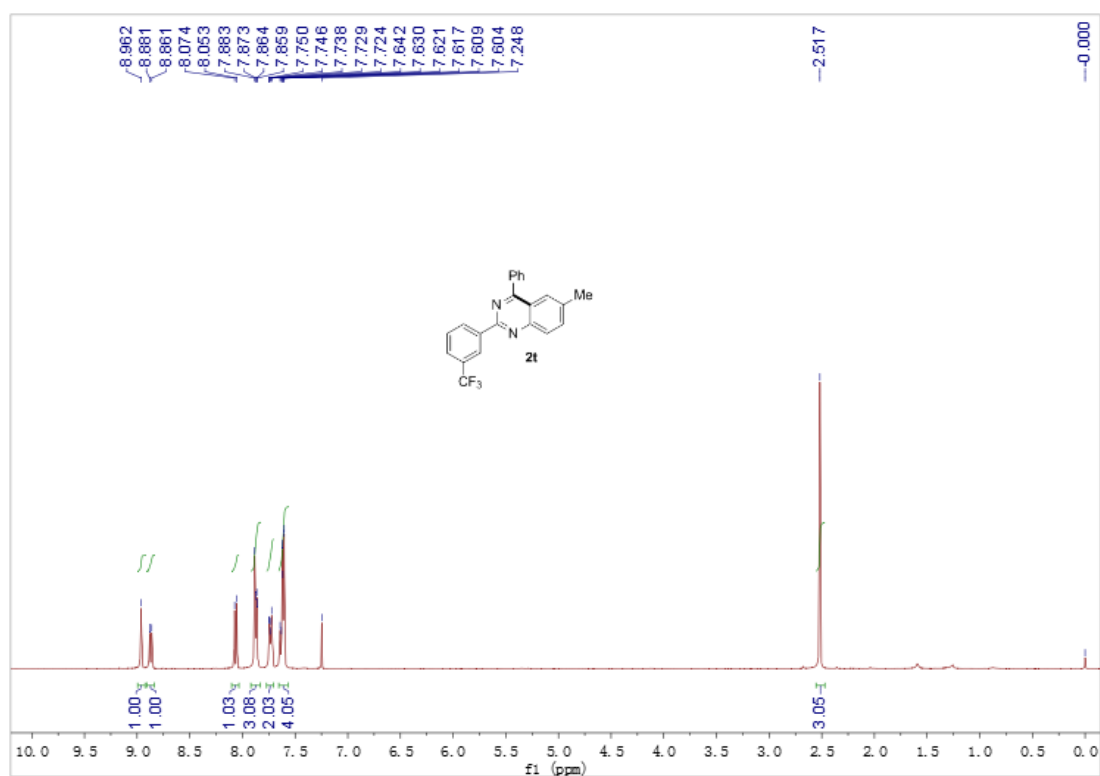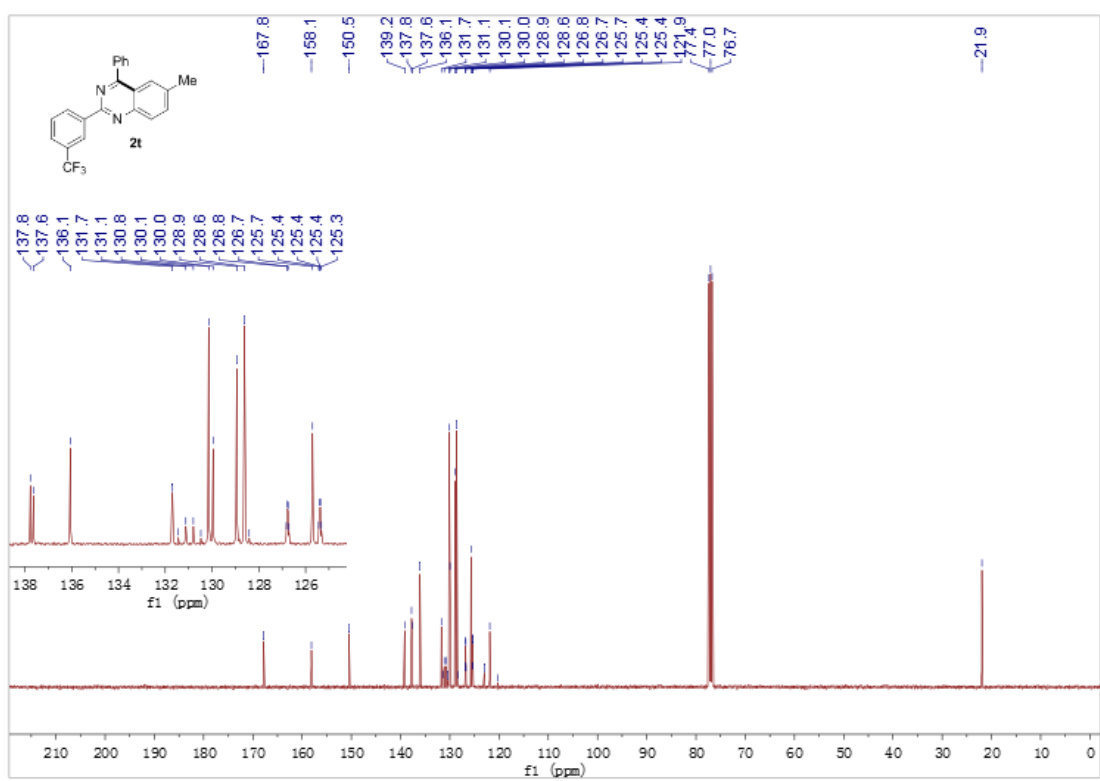

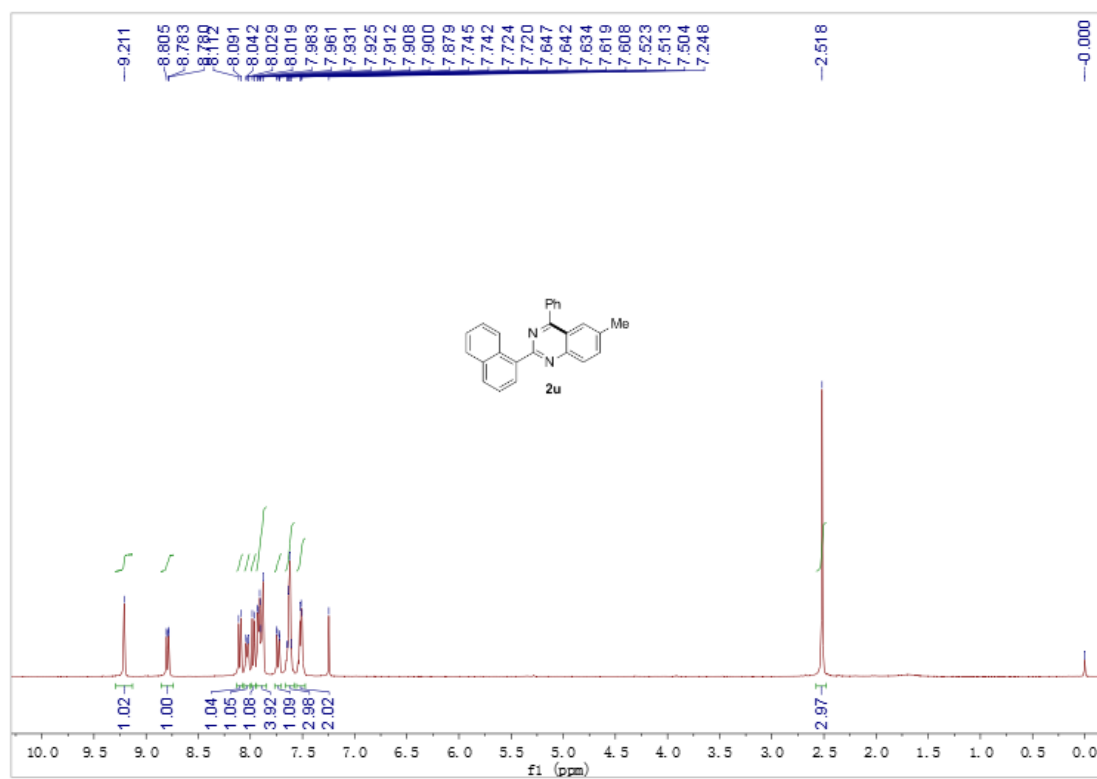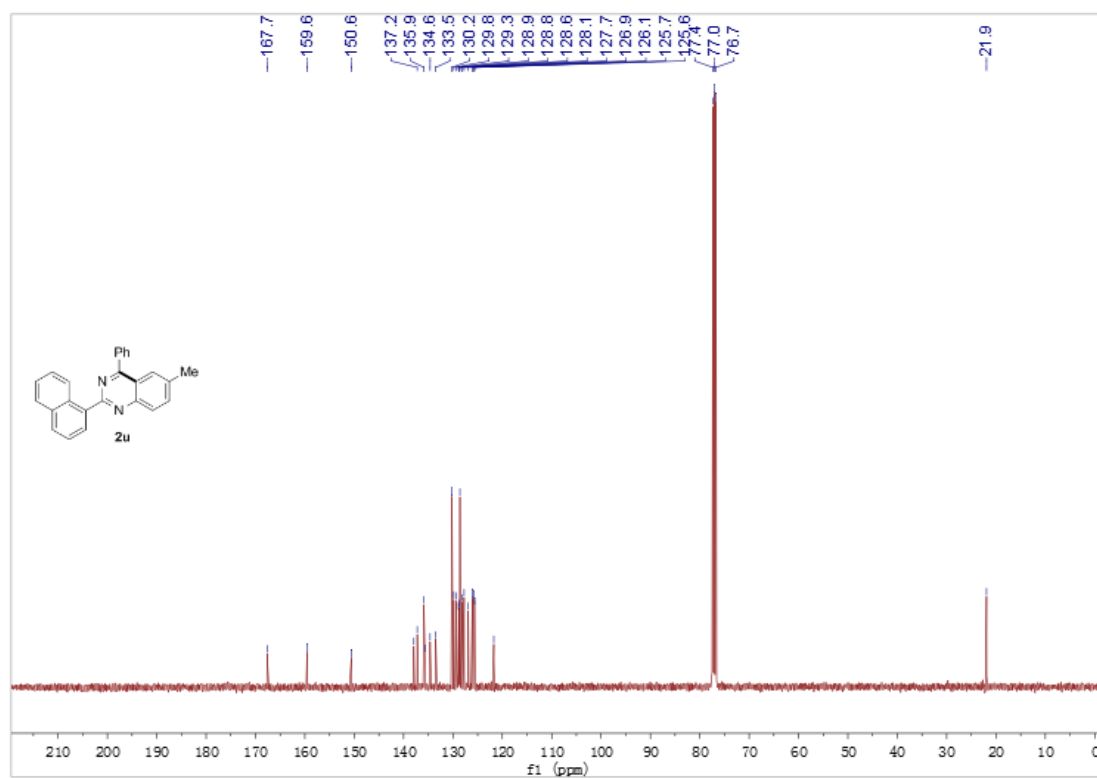

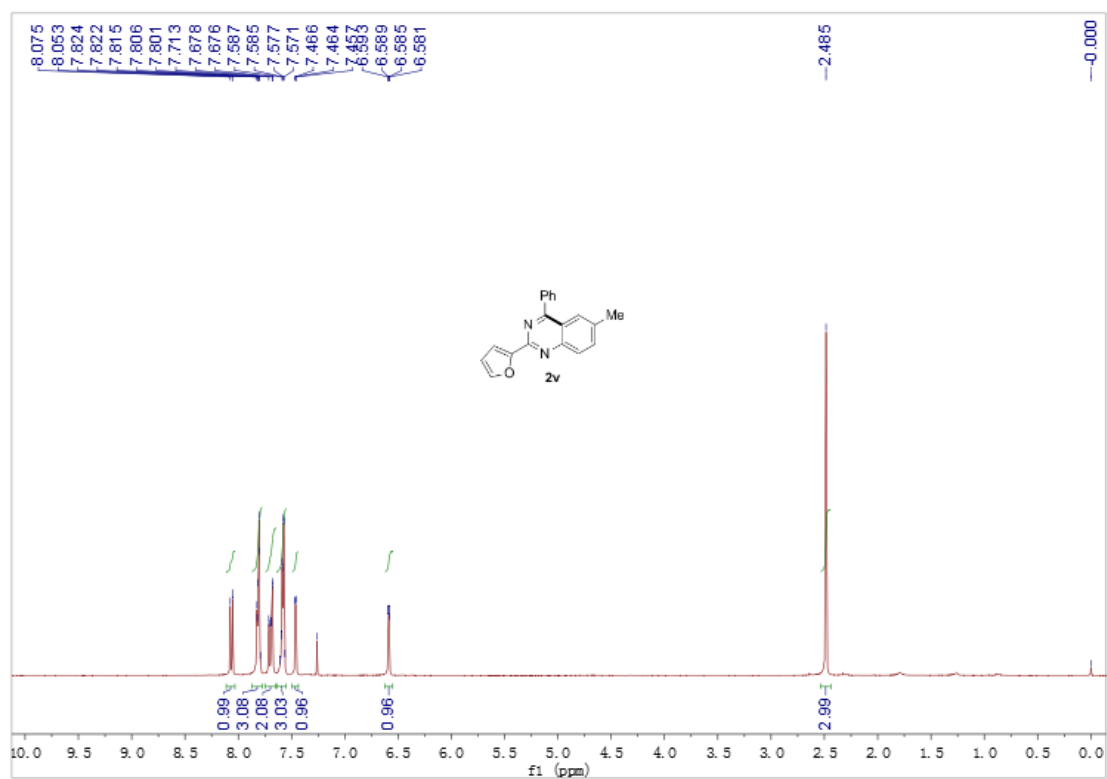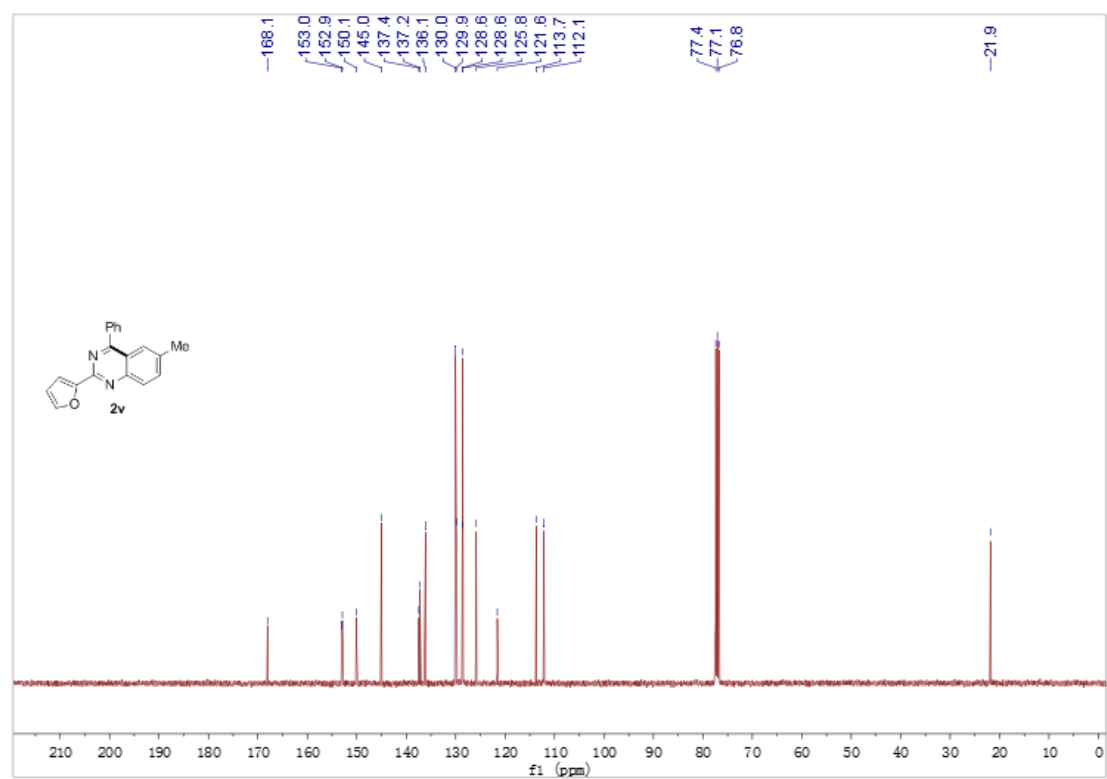

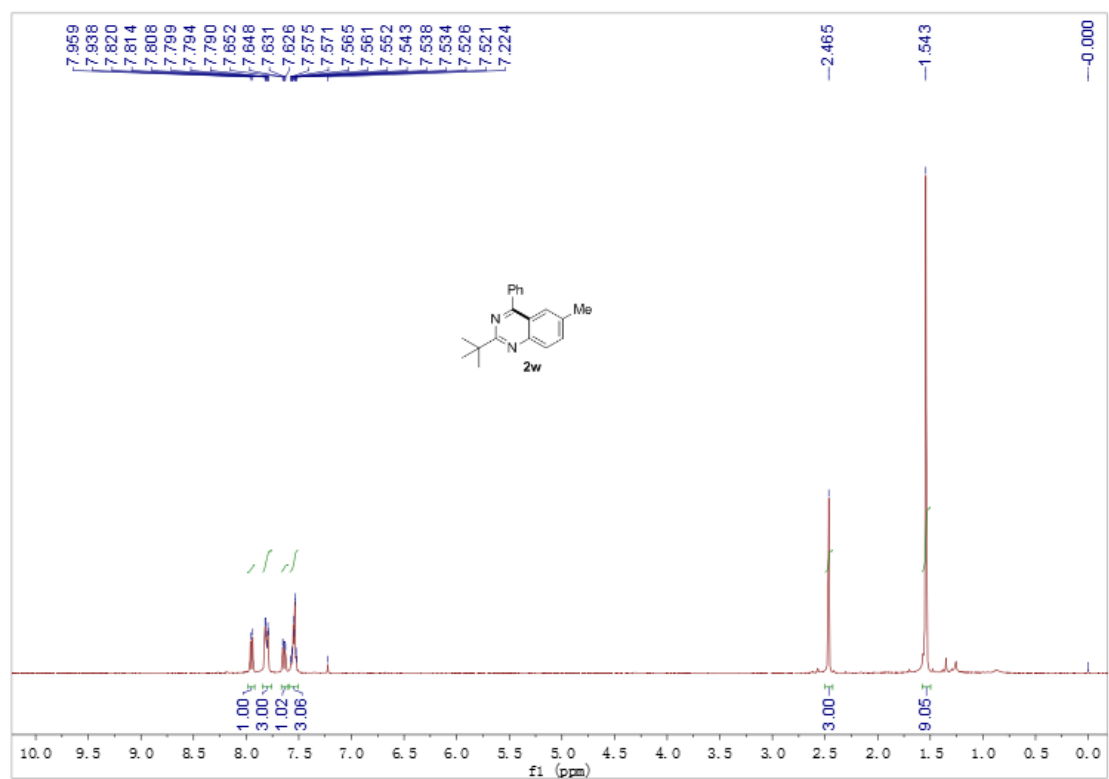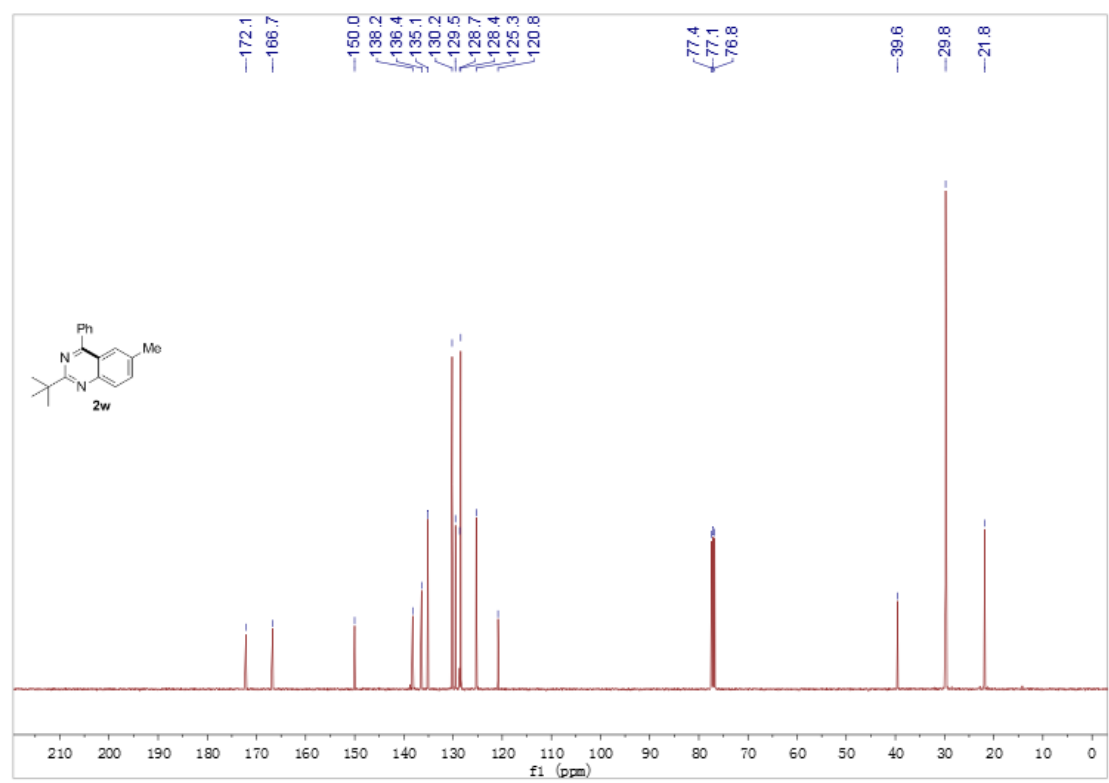

Supplement: Supplementary file 1 [file 6217299]
